# Supplementary material for: Vitamin D status and TB treatment outcomes in adult patients in Tanzania: a cohort study
Source: PubMed Central journal article supplement — BMJ Open. 2013 Nov 16;3(11):e003703. doi: 10.1136/bmjopen-2013-003703 (PMC3840339; doi:10.1136/bmjopen-2013-003703), 2013-11-16
Supplement: bmjopen-2013-003703.draft_revisions.pdf [file bmjopen-2013-003703.draft_revisions.pdf]

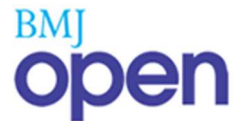

## Vitamin D Status and TB Treatment Outcomes in Adult Tanzanian Patients

|                                    |                                                                                                                                                                                                                                                                                                                                                                                  |
|------------------------------------|----------------------------------------------------------------------------------------------------------------------------------------------------------------------------------------------------------------------------------------------------------------------------------------------------------------------------------------------------------------------------------|
| Journal:                           | <i>BMJ Open</i>                                                                                                                                                                                                                                                                                                                                                                  |
| Manuscript ID:                     | bmjopen-2013-003703                                                                                                                                                                                                                                                                                                                                                              |
| Article Type:                      | Research                                                                                                                                                                                                                                                                                                                                                                         |
| Date Submitted by the Author:      | 01-Aug-2013                                                                                                                                                                                                                                                                                                                                                                      |
| Complete List of Authors:          | Mehta, Saurabh; Cornell University ,<br>Mugusi, Ferdinand; Muhimbili University of Health and Allied Sciences,<br>Bosch, Ronald; Harvard University,<br>Aboud, Said; Muhimbili University of Health and Allied Sciences,<br>Urassa, Willy; World Health Organization,<br>Villamor, Eduardo; University of Michigan Ann Arbor,<br>Fawzi, Wafaie; Harvard School of Public Health, |
| <b>Primary Subject<br>Heading</b>: | Global health                                                                                                                                                                                                                                                                                                                                                                    |
| Secondary Subject Heading:         | Infectious diseases, HIV/AIDS, Nutrition and metabolism, Epidemiology                                                                                                                                                                                                                                                                                                            |
| Keywords:                          | Tuberculosis < INFECTIOUS DISEASES, HIV , Africa , Vitamin D                                                                                                                                                                                                                                                                                                                     |
|                                    |                                                                                                                                                                                                                                                                                                                                                                                  |

SCHOLARONE™  
Manuscripts

## Vitamin D Status and TB Treatment Outcomes in Adult Tanzanian Patients

Saurabh Mehta<sup>1</sup>, Ferdinand M. Mugusi<sup>2</sup>, Ronald J. Bosch<sup>3</sup>, Said Aboud<sup>4</sup>, Willy Urassa<sup>5</sup>,  
Eduardo Villamor<sup>6</sup>, Wafaie W. Fawzi<sup>7</sup>

Corresponding Author: Saurabh Mehta, M.B.B.S., Sc.D.

Division of Nutritional Sciences, Cornell University

314 Savage Hall, Ithaca NY 14853

Phone: +1-607-255-2640; Fax: +1-607-255-1033; E-mail: [smehta@cornell.edu](mailto:smehta@cornell.edu)

Word Count: 3738 words

Number of figures: 2

Number of tables: 5

Online Supplementary Information: 2 tables

Running Title: Vitamin D and Tuberculosis

Keywords: Vitamin D, Tuberculosis, HIV, Africa

---

<sup>1</sup> Division of Nutritional Sciences, Cornell University, Ithaca NY 14853

<sup>2</sup> Department of Internal Medicine, Muhimbili University of Health and Allied Sciences, Dar es Salaam, Tanzania

<sup>3</sup> Department of Biostatistics, Harvard School of Public Health, Boston MA 02115

<sup>4</sup> Department of Microbiology and Immunology, Muhimbili University of Health and Allied Sciences, Dar es Salaam, Tanzania

<sup>5</sup> Diagnostics and Laboratory Technology Team, World Health Organization, Geneva, Switzerland

<sup>6</sup> Department of Epidemiology, University of Michigan School of Public Health, Ann Arbor MI 48109

<sup>7</sup> Departments of Global Health and Population, Nutrition, and Epidemiology, Harvard School of Public Health, Boston MA 02115

1  
2  
3 1 *Abstract*  
4

5 2 **Objectives:** Vitamin D is an immunomodulator and can alter response to tuberculosis  
6  
7  
8 3 treatment, though randomized trials have been inconclusive to date. We present the first  
9  
10 4 comprehensive analysis of the associations between vitamin D status and TB treatment,  
11  
12 5 T-cell counts, and nutritional outcomes by HIV status.  
13  
14

15  
16  
17 7 **Design:** Cohort study  
18  
19

20 8  
21  
22 9 **Setting:** Outpatient clinics in Dar es Salaam, Tanzania  
23  
24  
25 10

26  
27 11 **Participants:** 25-hydroxyvitamin D levels were assessed in a cohort of 677 patients with  
28  
29 12 TB (344 HIV-infected) initiating anti-TB treatment at enrollment in a multivitamin  
30  
31 13 supplementation (excluding vitamin D) trial.  
32  
33  
34 14

35  
36 15 **Primary and secondary outcome measures:** Information on treatment outcomes such as  
37  
38 16 failure and relapse, HIV disease progression, T-cell counts, and anthropometry was  
39  
40 17 collected routinely, with a median follow-up of 52 and 30 months for HIV-uninfected and  
41  
42 18 HIV-infected patients, respectively. Cox and binomial regression, and generalized  
43  
44 19 estimating equations were used to assess the association of vitamin D status with these  
45  
46 20 outcomes.  
47  
48  
49 21

50  
51  
52 22 **Results:** Mean vitamin D concentrations at enrollment were 69.8 ( $\pm$ 21.5) nmol/L [27.9  
53  
54 23 ( $\pm$ 8.6) ng/mL]. Vitamin D insufficiency ( $<$ 75 nmol/L) was associated with a 66% higher  
55  
56  
57  
58  
59  
60

1  
2  
3 24 risk of relapse (95% CI: 4%, 164%; 133% higher risk in HIV-uninfected patients). Each  
4  
5 25 unit higher vitamin D levels at baseline were associated with a decrease of 3 (p=0.004)  
6  
7  
8 26 CD8 and 3 (p=0.01) CD3 T-cells/ $\mu$ L during follow-up in HIV-infected patients. Low  
9  
10 27 vitamin D was also associated with a greater decrease of BMI (-0.21 kg/m<sup>2</sup>; 95% CI:-  
11  
12 28 0.39, -0.02), during the first eight months of follow-up. No association was observed for  
13  
14  
15 29 vitamin D status with mortality or HIV disease progression.  
16  
17  
18 30  
19  
20 31 **Conclusions:** Adequate vitamin D status is associated with a lower risk of relapse and  
21  
22 32 with improved nutritional indicators such as BMI in TB patients, with or without HIV  
23  
24 33 infection. Further research is needed to determine the optimal dose of vitamin D and  
25  
26 34 effectiveness of daily vitamin D supplementation among patients with TB.  
27  
28  
29 35  
30  
31 36  
32  
33  
34  
35  
36

1  
2  
3  
4 37 **Article Focus:** Recent laboratory data has suggested that optimal vitamin D status may  
5  
6 38 be associated with a more effective immune response to TB infection, a faster rate of  
7  
8 39 bacteriologic cure, and better long-term outcomes. However, clinical and epidemiological  
9  
10 40 studies have found inconsistent results. In this paper, we present the first comprehensive  
11  
12 41 analysis of the associations between vitamin D status and TB treatment, T-cell counts,  
13  
14 42 and nutritional outcomes by HIV status.  
15  
16  
17  
18  
19

20 44 **Key Messages:** We found that patients with adequate vitamin D status were less likely to  
21  
22 45 experience a relapse during follow-up after completing TB treatment. They were also  
23  
24 46 more likely to have a better nutritional status, as assessed by their body mass index,  
25  
26 47 during follow-up, compared to patients with low vitamin D status. The results provide  
27  
28 48 justification for conducting both a dose response study to determine optimal dose of  
29  
30 49 vitamin D and a randomized controlled trial of daily vitamin D supplementation among  
31  
32 50 patients with TB.  
33  
34  
35  
36  
37  
38

39 52 **Strengths and Limitations of this study:** The major strengths of this study include a  
40  
41 53 large number of participants, more than half of whom were HIV-infected, comprehensive  
42  
43 54 assessment of clinical, immunological, socio-demographic, and nutritional parameters,  
44  
45 55 and a long duration of follow-up. On the other hand, the major limitation is the possibility  
46  
47 56 of reverse causation and residual confounding. We have attempted to minimize this  
48  
49 57 through rigorous analyses and adjusting for several potential confounders, including  
50  
51 58 hemoglobin concentrations, HIV status, viral load, CD4 T-cells, and Karnofsky score, in  
52  
53 59 most analyses.  
54  
55  
56  
57  
58  
59  
60

1  
2  
3 60 **Introduction**  
4

5 61 *Mycobacterium tuberculosis* is one of the most pernicious infectious diseases and  
6  
7  
8 62 successful pathogens known to man. More than 95% of the estimated cases and deaths  
9  
10 63 due to tuberculosis (TB) occur in low-income countries. The United Republic of  
11  
12 64 Tanzania is one of the 22 high-burden countries that account for 80% of global TB cases.  
13  
14 65 Tanzania has an incidence of 177 cases per 100,000 population per year and a prevalence  
15  
16 66 of 183 cases per 100,000 population per year [1].  
17  
18  
19

20 67  
21  
22 68 The spread of Human Immunodeficiency Virus (HIV) has fuelled the resurgence of the  
23  
24 69 TB epidemic in Tanzania, as in other parts of sub-Saharan Africa [2]. HIV is the  
25  
26 70 strongest factor in the development of active TB; it is estimated that only one out of ten  
27  
28 71 immunocompetent persons infected with TB develops active TB in his/her lifetime;  
29  
30 72 whereas, one out of ten HIV-infected persons infected with TB will develop active TB  
31  
32 73 every year. An estimated 38% of TB patients in Tanzania are also infected with HIV [1].  
33  
34  
35

36 74  
37  
38 75 Current treatment regimens, given under appropriate management conditions, are nearly  
39  
40 76 100% curative for patients with drug-susceptible organisms. However, in Tanzania,  
41  
42 77 treatment fails in 12-17% of the cases. Additionally, TB patients in settings such as  
43  
44 78 Tanzania grapple with multiple health-related and quality of life issues, which are not  
45  
46 79 addressed adequately with treatment alone.  
47  
48  
49

50 80  
51  
52 81 Recent data has suggested that optimal vitamin D status may be associated with a more  
53  
54 82 effective immune response to TB infection, a faster rate of bacteriologic cure, and better  
55  
56  
57  
58  
59  
60

1  
2  
3 83 long-term outcomes. For example, a recent cross-sectional study found that vitamin D  
4  
5 84 deficiency is highly prevalent in South Africa and is associated with susceptibility to  
6  
7  
8 85 active TB both in the presence and absence of HIV infection [3]. A few randomized trials  
9  
10 86 have also been conducted; two of the recent ones failed to find an effect of vitamin D  
11  
12 87 supplementation on treatment success [4 5]. However, the dose used and duration of  
13  
14 88 supplementation may have precluded finding an effect. Further, most studies had small  
15  
16 89 sample sizes and assessed only a limited number of covariates.  
17  
18  
19  
20  
21

22 91 In this manuscript, we comprehensively examined the hypotheses that vitamin D status  
23  
24 92 may be associated with response to treatment, risk of treatment failure, laboratory  
25  
26 93 parameters such as T-cell counts, and anthropometric measurements in the context of a  
27  
28 94 randomized trial of micronutrient supplementation (supplement did not contain vitamin  
29  
30 95 D) in Tanzania to better inform future studies or trials.  
31  
32  
33

### 34 96

### 35

### 36 97 *Materials and Methods*

### 37

38 98 Study Population: The study population and recruitment methods have been described in  
39  
40 99 detail earlier [6]. Briefly, 887 adults with pulmonary tuberculosis (PTB) were enrolled in  
41  
42 100 a randomized trial to examine the effects of micronutrient supplementation on TB  
43  
44 101 treatment failure, relapse, and mortality. The trial started in April 2000 in Dar es Salaam,  
45  
46 102 Tanzania and continued until April 2005. The eligibility criteria for the study included  
47  
48 103 positive sputum smears for acid-fast bacilli (AFB), age between 18 and 65 years,  
49  
50 104 Karnofsky performance score of  $\geq 40\%$  [7], plan to stay in Dar es Salaam for 2 years, not  
51  
52 105 being pregnant, and not having received anti-TB treatment during the previous one year.  
53  
54  
55  
56  
57  
58  
59  
60

1  
2  
3 106 Consenting subjects were randomly assigned in computer-generated permuted blocks of  
4  
5 107 20, stratified by HIV status, to receive a daily oral dose of 1 of 2 regimens:  
6  
7 108 micronutrients (5000 IU of retinol, 20 mg of vitamin B1, 20mg of vitamin B2, 25mg of  
8  
9 109 vitamin B<sub>6</sub>, 100 mg of niacin, 50 µg of vitamin B<sub>12</sub>, 500 mg of vitamin C, 200 mg of  
10  
11 110 vitamin E, 0.8 mg of folic acid, and 100 µg of selenium) or placebo. These doses  
12  
13 111 represent between 6 and 10 times the recommended dietary allowance (RDA) and were  
14  
15 112 being tested at the time among HIV-infected adults from this setting [8]. We chose  
16  
17 113 multiples of the RDA because previous observational studies suggested that HIV-infected  
18  
19 114 individuals need higher dietary intakes of micronutrients to achieve normal serum  
20  
21 115 concentrations [9]. All patients received a daily combination of rifampicin, isoniazid,  
22  
23 116 pyrazinamide, and ethambutol under direct observation of a health worker during the first  
24  
25 117 2 months (intensive phase) followed by 6 months of self-administered daily isoniazid and  
26  
27 118 ethambutol, as per the Tanzania National TB and Leprosy Programme guidelines. None  
28  
29 119 of the HIV-infected patients received antiretroviral therapy, as these medications were  
30  
31 120 not routinely available in Tanzania at the time this trial was conducted.  
32  
33 121  
34  
35 122 At the time of randomization, research nurses collected information on various socio-  
36  
37 123 demographic characteristics including age, education levels, marital status, and  
38  
39 124 socioeconomic status. Anthropometric measurements were also obtained using  
40  
41 125 standardized procedures [10] at the randomization visit as well as during each monthly  
42  
43 126 follow-up visit. Height was measured to the nearest 0.1 cm using SECA Bodymeter 206  
44  
45 127 stadiometers, weight to the nearest 100 g with SECA 700 balance beam scales, and left  
46  
47  
48  
49  
50  
51  
52  
53  
54  
55  
56  
57  
58  
59  
60



1  
2  
3 128 mid-upper arm circumference (MUAC) at the midpoint between the acromion and  
4  
5 129 olecranon to the nearest 0.1 cm using non-stretchable tailor's tapes.  
6  
7  
8 130  
9  
10 131 Physician visits were scheduled every 3 months. During these visits, study physicians  
11  
12 132 inquired about the health of the subject during the preceding period and performed a  
13  
14 133 complete physical examination. The stage of HIV disease was assessed according to the  
15  
16 134 World Health Organization system [11].  
17  
18  
19 135  
20  
21 136 Ethics Approval: A written informed consent was obtained from all the study  
22  
23 137 participants. The institutional review boards of the Muhimbili University of Health and  
24  
25 138 Allied Sciences, the Tanzanian National AIDS Control Program, and the Harvard School  
26  
27 139 of Public Health approved the study protocol.  
28  
29  
30 140  
31  
32 141 Laboratory Methods: At the time of initiation of anti-TB treatment, HIV status was  
33  
34 142 assessed among consenting patients using 2 sequential ELISAs (Wellcozyme, Murex  
35  
36 143 Biotech; Enzygnost anti-HIV1/2 Plus, Dade Behring); discrepant results were resolved by  
37  
38 144 Western Blot test (Bio-rad, Genetic Systems). Both pre-test and post-test counseling was  
39  
40 145 provided. A blood sample also was obtained for measurement of hemoglobin and  
41  
42 146 albumin concentrations using AcT Diff II hematology analyzer (Beckman Coulter,  
43  
44 147 Miami) and Hitachi 911 analyzer (Roche Diagnostics), respectively. CD4, CD3, and CD8  
45  
46 148 T-cell counts were determined using FACScout or FACSCan systems (Becton  
47  
48 149 Dickinson, CA, USA). Viral load was also determined using the Amplicor HIV-1  
49  
50 150 monitor v1.5 assay (Roche Molecular Systems, Branchburg, NJ, USA).  
51  
52  
53  
54  
55  
56  
57  
58  
59  
60

1  
2  
3 151  
4  
5

6 152 Assessment of Vitamin D Status: Serum 25-hydroxyvitamin D concentrations were  
7  
8 153 measured using liquid chromatography-mass spectrometry at the Children's Hospital in  
9  
10 154 Boston only at enrollment. We defined low vitamin D status as serum 25(OH)D levels of  
11  
12 155 less than 75 nmol/L and adequate otherwise. Vitamin D deficiency was defined as serum  
13  
14 156 25(OH)D levels of less than 50 nmol/L.  
15  
16  
17

18 157

19  
20 158 Statistical Analysis: We examined the association of vitamin D status with TB treatment  
21  
22 159 outcomes as well as nutritional, immunological, and clinical end points in the entire  
23  
24 160 cohort and separately by HIV status at baseline. TB-related end points included treatment  
25  
26 161 failure, early relapse, and late relapse. Treatment failure by 1 month was defined as  
27  
28 162 positive AFB cultures at 1 month from the initiation of treatment. Relapses were deemed  
29  
30 163 to have occurred in patients with positive cultures, among those who had become culture  
31  
32 164 negative after treatment initiation. Relapses/recurrences included both endogenous  
33  
34 165 reactivation and exogenous reinfection, which could not be distinguished in this study.  
35  
36 166 We calculated the relative risks (RRs) and 95% confidence intervals (CIs) for each of  
37  
38 167 these outcomes by vitamin D status using binomial regression. We used Cox proportional  
39  
40 168 hazards models to assess the association of vitamin D status with mortality in all patients  
41  
42 169 and HIV disease progression from stage 3 to 4 in HIV-infected participants. We defined  
43  
44 170 the end of follow-up as the date when HIV stage was last assessed.  
45  
46  
47  
48  
49

50 171

51  
52  
53 172 We examined the association of vitamin D status with CD4, CD8, and CD3 T-cell counts,  
54  
55 173 viral load (in HIV-infected participants), indicators of nutritional status (body mass index  
56  
57  
58  
59  
60

1  
2  
3 174 [BMI] and albumin concentrations), and hemoglobin concentrations using generalized  
4  
5 175 estimating equations (GEEs). These models do not require that all patients have the same  
6  
7  
8 176 number of follow-up assessments or that the follow-up measurements be obtained at  
9  
10 177 exactly the same time points. We assumed a standard normal distribution for repeated  
11  
12 178 continuous end points (T cell subsets, log<sub>10</sub> viral load, anthropometry, and albumin and  
13  
14 179 hemoglobin concentrations) and estimated average differences during follow-up by  
15  
16 180 vitamin D status. We used an exchangeable correlation structure to account for within-  
17  
18 181 subject correlations and adjusted the models for the follow-up time when the  
19  
20 182 measurements had been obtained and for the baseline values.  
21  
22  
23  
24  
25 183

26  
27 184 We analyzed the data for the entire period and for the first 8 months, coinciding with the  
28  
29 185 expected end of TB treatment. Multivariate analyses adjusted for age, Karnofsky score,  
30  
31 186 baseline hemoglobin concentrations, viral load, HIV status, CD4 T-cell counts, and  
32  
33 187 micronutrient supplementation, unless otherwise specified in the results section or the  
34  
35 188 tables. All analyses were performed using SAS software version 9.3 (SAS Institute Inc.,  
36  
37 189 Cary NC).  
38  
39  
40  
41  
42  
43

#### 44 **Results**

45  
46 192 Baseline vitamin D concentrations were available for 677 patients out of the original  
47  
48 193 cohort of 887. Mean 25-hydroxyvitamin D concentration was 69.8 (±21.5) nmol/L [27.9  
49  
50 194 (±8.6) ng/mL] and its distribution is shown in Figure 1. The baseline characteristics of  
51  
52 195 these 677 patients by HIV status are presented in Table 1. 36% of the HIV-infected  
53  
54  
55 196 patients had CD4 T-cell counts below 200 cells/μL. The mean body mass index (BMI)  
56  
57  
58  
59  
60

1  
2  
3 197 was  $19.1 \pm 2.7$  kg/m<sup>2</sup>. The median follow-up time for HIV-uninfected patients was 52  
4  
5 198 months (inter-quartile range [IQR]: 47-57 months) and for HIV-infected patients was 30  
6  
7  
8 199 months (IQR: 15-41 months).  
9

10  
11 200

12  
13 201 The mean vitamin D concentrations were significantly different across season of blood  
14  
15 202 draw in this cohort ( $p=0.004$ ). Tanzania has four seasons: dry (January-February); long  
16  
17 203 rains (March-June); dry (July-October); short rains (November-December). The boxplot  
18  
19 204 of vitamin D's association with season of blood draw is presented in Figure 2. In  
20  
21 205 subgroup analyses, this association was only observed among the HIV-uninfected  
22  
23 206 patients and not the HIV-infected patients.  
24  
25  
26

27 207

28  
29 208 We examined the correlates of low vitamin D status, defined as serum 25(OH)D  
30  
31 209 concentrations below 75 nmol/L (75 nmol/L) in Supplemental Tables 1 (HIV-uninfected)  
32  
33 210 and 2 (HIV-infected). All factors that had univariate associations with  $p<0.20$  were  
34  
35 211 included in a multivariate model; only the factors that had  $p<0.05$  were retained in the  
36  
37 212 final model. Among the HIV-uninfected subset, patients enrolled in the dry winter season  
38  
39 213 between July and October were 50% more likely to have low vitamin D concentrations,  
40  
41 214 compared to patients enrolled in the dry summer season between January and February ( $p$   
42  
43 215 for season=0.002). Similarly, the participants with the lowest height were more likely to  
44  
45 216 have low vitamin D status ( $p=0.01$ ). Finally, greater expenditure on food per person per  
46  
47 217 day was associated with a lower risk of having inadequate vitamin D status (Risk Ratio  
48  
49 218 [RR] per 1000 Tanzanian Shillings [approximately 1 US Dollar at the time of the study]:  
50  
51 219 0.76; 95% Confidence Interval [CI]: 0.59, 0.98). In the HIV-infected subset, patients with  
52  
53  
54  
55  
56  
57  
58  
59  
60

1  
2  
3 220 higher hemoglobin concentrations at baseline were less likely to have low vitamin D  
4  
5 221 status, with a 7% lower risk per 1 g/dL higher hemoglobin level ( $p=0.007$ ). On the other  
6  
7  
8 222 hand, higher number of CD4 T-cells was associated with a higher risk of having  
9  
10 223 inadequate vitamin D status (4% higher risk per 100 CD4 T-cells/ $\mu\text{L}$ ;  $p=0.02$ ).  
11

12 224

13  
14  
15 225 There was no significant association of vitamin D status at TB treatment initiation with  
16  
17 226 mortality or HIV disease progression in this cohort (Table 2). There was no association  
18  
19  
20 227 observed between vitamin D status and treatment failure one month after initiation of TB  
21  
22 228 treatment (Table 3). However, patients with low vitamin D status ( $<75$  nmol/L) had a  
23  
24 229 66% higher risk of relapse after becoming culture-negative at one month after initiation  
25  
26  
27 230 of TB treatment (95% CI: 4%, 164%). This association was more pronounced in those  
28  
29 231 who were not HIV-infected at enrollment in the study (RR: 2.33; 95% CI: 1.26, 4.29). In  
30  
31 232 analysis with continuous vitamin D levels, each nmol/L increase was associated with a  
32  
33 233 1% lower risk of relapse during follow-up ( $p=0.04$ ).  
34  
35

36 234

37  
38  
39 235 Low vitamin D status was observed to have no association with CD4 T-cell counts during  
40  
41 236 the entire follow-up in either the HIV-infected or the HIV-uninfected subsets (Table 4).  
42  
43 237 However, low vitamin D status was associated with greater CD4 T-cell counts during the  
44  
45  
46 238 first eight months of follow-up in the HIV-infected patients (mean difference: 58; 95%  
47  
48 239 CI: 13, 104).  
49

50 240

51  
52  
53 241 In analysis among HIV-infected patients with continuous vitamin D levels, each nmol/L  
54  
55 242 higher vitamin D concentration was associated with a decrease of 3 CD8 and 3 CD3 T-  
56  
57  
58  
59  
60

1  
2  
3 243 cells per  $\mu\text{L}$ . Low vitamin D status was associated with an average of 85 higher CD8 T-  
4  
5 244 cells/ $\mu\text{L}$  during follow-up (95% CI: 4, 165). Similar results were observed when we  
6  
7  
8 245 restricted the analyses to the first eight months of follow-up, the duration of TB treatment  
9  
10 246 at the time of the study in Tanzania. No relationship was observed with mean viral loads  
11  
12 247 during follow-up in the patients who were HIV-infected at the time of enrollment.  
13  
14

15 248  
16  
17 249 In analysis examining association of vitamin D status with nutritional parameters in the  
18  
19 250 entire period of follow-up, no significant relationship was observed with BMI, albumin,  
20  
21 251 or hemoglobin concentrations (Table 5). During the first eight months of follow-up,  
22  
23 252 patients with low vitamin D experienced a decline in BMI (Mean:  $-0.21 \text{ kg/m}^2$ ; 95% CI: -  
24  
25 253  $0.39, -0.02$ ), compared to patients with adequate vitamin D status. These results were  
26  
27 254 more pronounced in HIV-uninfected patients (Mean:  $-0.34$ ; 95% CI:  $-0.60, -0.09$ ) and not  
28  
29 255 significant in HIV-infected patients. HIV-infected patients with low vitamin D status had  
30  
31 256 increased albumin levels (Mean:  $0.94$ ; 95% CI:  $0.55, 1.32$ ) during the first eight months  
32  
33 257 of follow-up compared to patients with adequate vitamin D status.  
34  
35  
36  
37  
38  
39  
40

#### 41 259 *Discussion*

42  
43 260 In this study among 677 patients with tuberculosis in Tanzania, more than 61% of the  
44  
45 261 participants had vitamin D concentrations below  $75 \text{ nmol/L}$  ( $75 \text{ nmol/L}$ ). Vitamin D  
46  
47 262 concentrations were associated with the season of blood draw, money spent on food per  
48  
49 263 person per day, and height in HIV-uninfected participants and hemoglobin concentrations  
50  
51 264 and CD4 T-cell counts among HIV-infected patients. Low vitamin D status ( $<75 \text{ nmol/L}$ )  
52  
53 265 was not associated with mortality, HIV disease progression, or treatment failure during  
54  
55  
56  
57  
58  
59  
60

1  
2  
3 266 follow-up in the entire cohort. However, patients with low vitamin D status had an  
4  
5 267 increased risk of experiencing TB relapse during follow-up. Further, low vitamin D status  
6  
7 268 was associated with a decline in CD8 and CD3 T-cells in both the first eight months (the  
8  
9 269 duration of TB treatment) and the entire period of follow-up. A similar relationship was  
10  
11 270 observed with BMI in the first eight months of follow-up.  
12  
13  
14

15 271  
16  
17 272 Our study was conducted in Dar es Salaam, the largest urban center in Tanzania, and just  
18  
19 273 six degrees south of the Equator. The prevalence of low vitamin D status (>61%) in this  
20  
21 274 study is higher than the approximately 40% found in a previous study among TB patients  
22  
23 275 in Mwanza, Tanzania [12] and in our studies among HIV-infected pregnant women  
24  
25 276 (~85% of them had stage 1 HIV disease, unlike this study) in Dar es Salaam [13 14].  
26  
27 277 However, this prevalence is lower than what was observed in a cross-sectional study in  
28  
29 278 South Africa, where 88% of HIV-uninfected and 97% of HIV-infected TB patients had  
30  
31 279 low vitamin D status. The mean vitamin D concentration in this study was 69.8 nmol/L,  
32  
33 280 compared to 86.5 nmol/L in the study in Mwanza and 28.8-40 nmol/L in the South  
34  
35 281 African study. One study from Thailand observed similar levels (69.0 nmol/L) in TB  
36  
37 282 patients [15]; Thailand is located at a similar distance from the Equator as Tanzania,  
38  
39 283 though it is in the northern hemisphere. Similar to the study in South Africa, the vitamin  
40  
41 284 D levels were lowest in our study in the dry winter season between July and October,  
42  
43 285 though the differences were not as stark. For example, the mean vitamin D concentration  
44  
45 286 in January to March in the South African study was 56.8 nmol/L and 30.8 nmol/L  
46  
47 287 between July and September, whereas in our study, the concentrations were 74.8 nmol/L  
48  
49 288 for January through February, and 66.3 nmol/L for July through October.  
50  
51  
52  
53  
54  
55  
56  
57  
58  
59  
60

1  
2  
3 289  
4

5 290 Vitamin D is synthesized in the skin through the action of ultraviolet light on 7-  
6  
7  
8 291 dehydrocholesterol. Fatty fish, such as salmon and sardines, are good sources of vitamin  
9  
10 292 D in the diet but are not widely available everywhere and are usually expensive.  
11  
12 293 Increasing urbanization and a tendency to spend most time indoors are major factors that  
13  
14 294 contribute to the inability of the skin to synthesize adequate amounts of vitamin D [16-  
15  
16  
17 295 18]. Additionally, the TB disease itself and/or the HIV co-infection in the participants in  
18  
19 296 this study are probably the primary reasons for restricted physical activity, lack of  
20  
21 297 adequate exposure to sunlight, and consequent low concentrations of vitamin D.  
22  
23  
24 298

25  
26  
27 299 Several other investigators have examined correlates of vitamin D status in TB patients.  
28  
29 300 The study in Mwanza found that marital status, BMI, and serum transferrin receptor  
30  
31 301 concentrations were correlated with vitamin D status. Though the first two were  
32  
33 302 correlated with vitamin D status in our study in univariate analyses, neither remained  
34  
35 303 significant in multivariate analyses. We didn't measure serum transferrin receptor in our  
36  
37 304 study, though we did observe a correlation of vitamin D status with hemoglobin  
38  
39 305 concentrations among the HIV-infected subset. Another study in South Africa found that  
40  
41 306 TB status (active disease vs. latent infection), month of sampling, and BMI were  
42  
43 307 significantly correlated with vitamin D status in multivariate analyses [3]. All patients in  
44  
45 308 our study had active disease, and we didn't observe a relationship with BMI in our  
46  
47 309 analyses. The study in South Africa incorporated only those correlates associated with  
48  
49 310 serum 25(OH)D concentration with  $P < 0.05$  in univariate analysis in the multivariate  
50  
51 311 model. This may have precluded selection of important covariates and confounders, if  
52  
53  
54  
55  
56  
57  
58  
59  
60



1  
2  
3 312 measured, and produced biased estimates and confidence intervals; increasing the  
4  
5 313 nominal significance level to 20% or more, as used in this study [19] can eliminate most  
6  
7 314 of this bias. Most other studies have been with smaller sample sizes and have examined a  
8  
9 315 limited set of covariates, compared to the current study.  
10  
11  
12  
13  
14

15 317 There was no association of vitamin D status with mortality or HIV disease progression  
16  
17 318 in this cohort, unlike our previous studies among HIV-infected pregnant women [13 20]  
18  
19 319 or HIV-infected adults [21 22] in Tanzania. The major difference is that in our earlier  
20  
21 320 studies [13 20], a large majority (~85%) of the participants had stage 1 or asymptomatic  
22  
23 321 HIV disease, whereas in this study, most of the individuals were already at stage 3  
24  
25 322 disease.  
26  
27  
28

29 323  
30  
31  
32  
33 324 The association of low vitamin D status with TB recurrence/relapse, primarily driven by  
34  
35 325 the HIV-uninfected subset, is a novel finding in a longitudinal study and has important  
36  
37 326 implications. Vitamin D deficiency has been linked to TB in several studies – a  
38  
39 327 hypothesis perhaps initially generated by the observed seasonality of TB. *In vitro* and  
40  
41 328 animal studies indicate that 1,25-dihydroxyvitamin D<sub>3</sub>, the most active form of vitamin  
42  
43 329 D, may increase mycobacterial killing by macrophages but also limits host damage by  
44  
45 330 decreasing the gamma-interferon production [23-28]. In perhaps the strongest evidence to  
46  
47 331 date for a role of vitamin D in tuberculosis, a study by Liu *et al* [29] found that the  
48  
49 332 antimycobacterial response in humans is dependent on adequate availability of vitamin D.  
50  
51  
52  
53

54  
55 333  
56  
57  
58  
59  
60

1  
2  
3 334 A few randomized trials of vitamin D supplementation in TB patients have been  
4  
5 335 conducted in the past few years [4 5 30]. In a randomized trial that was conducted among  
6  
7 336 365 TB patients in Guinea-Bissau starting antituberculosis treatment, overall mortality  
8  
9 337 was 15% (54 of 365) at 1 year of follow-up and similar in both arms [5]. Martineau and  
10  
11 338 colleagues didn't find a difference in median time to sputum culture conversion with  
12  
13 339 vitamin D supplementation of 2.5 mg vitamin D3 at enrollment, 14, 28, and 42 days after  
14  
15 340 starting TB treatment in 126 adults with sputum smear-positive PTB [4]. A recent report  
16  
17 341 by Coussens *et al* from a subset of the 126 adults included in the trial above stated that  
18  
19 342 median time to sputum smear conversion in the intervention arm was significantly shorter  
20  
21 343 than in the control arm (23 vs. 36 days;  $p=0.04$ ) [30]. The lack of effect and concordance  
22  
23 344 in most of these trials is probably due to the dose and dosing interval used. It is worth  
24  
25 345 noting however, that large intermittent doses of vitamin D may result in  
26  
27 346 supraphysiological concentrations in some cases, which may be more harmful than  
28  
29 347 helpful in their effects on the immune system [31].  
30  
31  
32  
33  
34  
35  
36  
37  
38  
39  
40

348  
41 349 Low vitamin D status also was associated with T-cell subset counts only among the HIV-  
42  
43 350 infected patients in this cohort. We can only speculate as to the reasons for the  
44  
45 351 significantly higher increase in CD4 T-cells observed in patients with low vitamin D  
46  
47 352 levels at baseline. One potential explanation is that HIV-infected patients with low  
48  
49 353 vitamin D status may experience more uncontrolled immune reconstitution, leading to a  
50  
51 354 greater increase in CD4 T-cell counts, on treatment of TB, compared to patients with  
52  
53 355 adequate vitamin D status. This may also explain why this relationship is observed only  
54  
55 356 in the first eight months of follow-up and not subsequently.  
56  
57  
58  
59  
60

1  
2  
3 357  
4  
5  
6

7 358 The results for CD8 and CD3 T-cells are consistent with our previous studies among  
8  
9 359 HIV-infected women in Tanzania [13 14]. This could suggest a possible role of vitamin  
10  
11 360 D in inflammation. Although, the conventional role of CD8 cells is as cytotoxic cells,  
12  
13 361 they also are effector cells in inflammation [32]. The involvement of vitamin D in  
14  
15 362 modulating CD8 cells is also indicated by the fact that CD8 cells express the highest  
16  
17 363 concentration of vitamin D receptor of the immune cells [33]. Other studies also have  
18  
19 364 found that vitamin D suppresses antigen-stimulated proinflammatory cytokine responses,  
20  
21 365 which may help speed up resolution of inflammatory responses that can lead to increased  
22  
23 366 risk of mortality among TB patients [30].  
24  
25  
26  
27

28 367  
29

30 368 TB, once known as ‘consumption’, is associated with significant wasting and weight loss.  
31  
32 369 The observation that better vitamin D status among HIV-uninfected patients is associated  
33  
34 370 with a greater increase in BMI during follow-up is likely related to decreased risk of  
35  
36 371 relapse among these patients, as well as improvement in quality of life through  
37  
38 372 mechanisms such as better metabolism that were not directly assessed in this study.  
39  
40  
41

42 373 The major strengths of this study include a large number of participants, more than half  
43  
44 374 of whom were HIV-infected, comprehensive assessment of clinical, immunological,  
45  
46 375 socio-demographic, and nutritional parameters, and a long duration of follow-up. On the  
47  
48 376 other hand, the major limitation is the possibility of reverse causation and residual  
49  
50 377 confounding. We have attempted to minimize this through rigorous analyses and  
51  
52 378 adjusting for several potential confounders, including hemoglobin concentrations, HIV  
53  
54 379 status, viral load, CD4 T-cells, and Karnofsky score, in most analyses. The study results  
55  
56  
57  
58  
59  
60

1  
2  
3 380 are generalizable to most settings with a high TB burden and widely prevalent vitamin D  
4  
5 381 insufficiency.  
6  
7

8 382

9  
10 383 In summary, our study results indicate that adequate vitamin D status is associated with  
11  
12 384 better clinical and nutritional parameters during follow-up in a cohort of TB patients in  
13  
14 385 Tanzania. While randomized trials of vitamin D supplementation among TB patients are  
15  
16 386 urgently warranted, it is also imperative to conduct dose-response studies to determine  
17  
18 387 ideal dose and duration for the supplement.  
19  
20

21 388

22 389

23 390  
24  
25  
26  
27  
28  
29  
30  
31  
32  
33  
34  
35  
36  
37  
38  
39  
40  
41  
42  
43  
44  
45  
46  
47  
48  
49  
50  
51  
52  
53  
54  
55  
56  
57  
58  
59  
60

1  
2  
3 391 *Acknowledgments*  
4

5 392 We thank the patients, whose participation made this study possible. We are grateful to  
6  
7  
8 393 the study coordinator, Dorothy Mallya, and to the study physicians, research nurses, and  
9  
10 394 laboratory and administrative staff at Muhimbili University of Health and Allied Sciences  
11  
12 395 in Dar es Salaam, Tanzania, for their contributions to the project.  
13

14  
15 396

17 397 *Financial support*

18  
19  
20  
21 398 National Institute of Allergy and Infectious Diseases, National Institutes of Health (grant  
22  
23 399 U01AI045441 to support the study)  
24

25  
26 400

27  
28 401 The authors report NO conflict of interest  
29

30  
31 402

32  
33 403 *Author Contributions*

34  
35 404 SM wrote the first draft of the manuscript and analyzed and interpreted the data; FMM,  
36  
37 405 RJB, SA, WU, EV, and WWF were investigators of the parent trial and contributed to  
38  
39 406 field activities and oversight; RJB also helped with the analysis and interpretation of the  
40  
41 407 data; all authors participated in study design and contributed to the final manuscript. All  
42  
43 408 authors have also read and approved the final manuscript.  
44  
45

46  
47 409

48  
49 410  
50  
51  
52  
53  
54  
55  
56  
57  
58  
59  
60

## References

1. WHO. Global Tuberculosis Control. Geneva: World Health Organization, 2011.
2. Chaisson RE, Martinson NA. Tuberculosis in Africa--combating an HIV-driven crisis. *N Engl J Med* 2008;**358**(11):1089-92 doi: 358/11/1089 [pii] 10.1056/NEJMp0800809[published Online First: Epub Date]].
3. Martineau AR, Nhamoyebonde S, Oni T, et al. Reciprocal seasonal variation in vitamin D status and tuberculosis notifications in Cape Town, South Africa. *Proc Natl Acad Sci U S A* 2011;**108**(47):19013-7 doi: 10.1073/pnas.1111825108[published Online First: Epub Date]].
4. Martineau AR, Timms PM, Bothamley GH, et al. High-dose vitamin D(3) during intensive-phase antimicrobial treatment of pulmonary tuberculosis: a double-blind randomised controlled trial. *Lancet* 2011;**377**(9761):242-50 doi: 10.1016/S0140-6736(10)61889-2[published Online First: Epub Date]].
5. Wejse C, Gomes VF, Rabna P, et al. Vitamin D as supplementary treatment for tuberculosis: a double-blind, randomized, placebo-controlled trial. *American Journal of Respiratory and Critical Care Medicine* 2009;**179**(9):843-50 doi: 10.1164/rccm.200804-567OC[published Online First: Epub Date]].
6. Villamor E, Mugusi F, Urassa W, et al. A Trial of the Effect of Micronutrient Supplementation on Treatment Outcome, T Cell Counts, Morbidity, and Mortality in Adults with Pulmonary Tuberculosis. *J Infect Dis* 2008;**197**(11):1499-505 doi: 10.1086/587846 10.1086/587846 [pii][published Online First: Epub Date]].

- 1  
2  
3  
4  
5  
6  
7  
8  
9  
10  
11  
12  
13  
14  
15  
16  
17  
18  
19  
20  
21  
22  
23  
24  
25  
26  
27  
28  
29  
30  
31  
32  
33  
34  
35  
36  
37  
38  
39  
40  
41  
42  
43  
44  
45  
46  
47  
48  
49  
50  
51  
52  
53  
54  
55  
56  
57  
58  
59  
60
7. Karnofsky DA, Abelmann WH, Craver LF, et al. The use of nitrogen mustards in the palliative treatment of cancer. *Cancer* 1948;**1**:634-56
8. Fawzi WW, Msamanga GI, Spiegelman D, et al. A randomized trial of multivitamin supplements and HIV disease progression and mortality. *N Engl J Med* 2004;**351**(1):23-32
9. Baum M, Cassetti L, Bonvehi P, et al. Inadequate dietary intake and altered nutrition status in early HIV-1 infection. *Nutrition* 1994;**10**(1):16-20
10. Lohman TG, Roche AF, Martorell R. *Anthropometric standardization reference manual*. Champaign, IL: Human Kinetics Books, 1988.
11. WHO. Interim proposal for a WHO staging system for HIV infection and disease. *Wkly Epidemiol Rec* 1990;**65**:221-24
12. Friis H, Range N, Pedersen ML, et al. Hypovitaminosis D is common among pulmonary tuberculosis patients in Tanzania but is not explained by the acute phase response. *J Nutr* 2008;**138**(12):2474-80 doi: 10.1093/ajph/98.12.2474 [pii] 10.3945/jn.108.094979[published Online First: Epub Date].
13. Mehta S, Giovannucci E, Mugusi FM, et al. Vitamin D status of HIV-infected women and its association with HIV disease progression, anemia, and mortality. *PLoS ONE* 2010;**5**(1):e8770 doi: 10.1371/journal.pone.0008770[published Online First: Epub Date].
14. Mehta S, Spiegelman D, Aboud S, et al. Lipid-soluble vitamins A, D, and E in HIV-infected pregnant women in Tanzania. *European journal of clinical nutrition* 2010;**64**(8):808-17 doi: 10.1038/ejcn.2010.76[published Online First: Epub Date].
15. Davies PD, Church HA, Bovornkitti S, et al. Altered vitamin D homeostasis in tuberculosis. *Intern Med (Thailand)* 1988;**4**:45-47

- 1  
2  
3 16. Norman AW. Nutritional Aspects of Vitamin D. <http://vitamind.ucr.edu/nutri.html>.  
4  
5 Accessed Oct 9, 2006. 1999. <http://vitamind.ucr.edu/nutri.html> (accessed Oct 9, 2006).  
6  
7  
8 17. Utiger RD. The need for more vitamin D. *N Engl J Med* 1998;**338**(12):828-9  
9  
10 18. Holick MF. High prevalence of vitamin D inadequacy and implications for health.  
11  
12 *Mayo Clin Proc* 2006;**81**(3):353-73  
13  
14 19. Greenland S. Modeling and variable selection in epidemiologic analysis. *Am J Public*  
15  
16 *Health* 1989;**79**(3):340-9  
17  
18 20. Mehta S, Mugusi FM, Spiegelman D, et al. Vitamin D status and its association with  
19  
20 morbidity including wasting and opportunistic illnesses in HIV-infected women in  
21  
22 Tanzania. *AIDS Patient Care STDS* 2011;**25**(10):579-85 doi:  
23  
24 10.1089/apc.2011.0182[published Online First: Epub Date].  
25  
26  
27 21. Sudfeld CR, Giovannucci EL, Isanaka S, et al. Vitamin D Status and Incidence of  
28  
29 Pulmonary Tuberculosis, Opportunistic Infections, and Wasting Among HIV-Infected  
30  
31 Tanzanian Adults Initiating Antiretroviral Therapy. *The Journal of infectious diseases*  
32  
33 2013;**207**(3):378-85 doi: 10.1093/infdis/jis693[published Online First: Epub Date].  
34  
35  
36 22. Sudfeld CR, Wang M, Aboud S, et al. Vitamin D and HIV progression among  
37  
38 Tanzanian adults initiating antiretroviral therapy. *PloS one* 2012;**7**(6):e40036 doi:  
39  
40 10.1371/journal.pone.0040036[published Online First: Epub Date].  
41  
42  
43 23. Thoma-Uszynski S, Stenger S, Takeuchi O, et al. Induction of direct antimicrobial  
44  
45 activity through mammalian toll-like receptors. *Science* 2001;**291**(5508):1544-7  
46  
47  
48 24. Waters WR, Palmer MV, Nonnecke BJ, et al. Mycobacterium bovis infection of  
49  
50 vitamin D-deficient NOS2<sup>-/-</sup> mice. *Microb Pathog* 2004;**36**(1):11-7  
51  
52  
53  
54  
55  
56  
57  
58  
59  
60



- 1  
2  
3  
4  
5  
6  
7  
8  
9  
10  
11  
12  
13  
14  
15  
16  
17  
18  
19  
20  
21  
22  
23  
24  
25  
26  
27  
28  
29  
30  
31  
32  
33  
34  
35  
36  
37  
38  
39  
40  
41  
42  
43  
44  
45  
46  
47  
48  
49  
50  
51  
52  
53  
54  
55  
56  
57  
58  
59  
60
25. Waters WR, Nonnecke BJ, Foote MR, et al. Mycobacterium bovis bacille Calmette-Guerin vaccination of cattle: activation of bovine CD4+ and gamma delta TCR+ cells and modulation by 1,25-dihydroxyvitamin D3. *Tuberculosis (Edinb)* 2003;**83**(5):287-97
26. Waters WR, Nonnecke BJ, Rahner TE, et al. Modulation of Mycobacterium bovis-specific responses of bovine peripheral blood mononuclear cells by 1,25-dihydroxyvitamin D(3). *Clin Diagn Lab Immunol* 2001;**8**(6):1204-12
27. Kawakami K, Teruya K, Tohyama M, et al. [A therapeutic trial of experimental tuberculosis with gamma-interferon in an immunocompromised mouse model]. *Kekkaku* 1994;**69**(10):607-13
28. McMurray DN, Bartow RA, Mintzer CL, et al. Micronutrient status and immune function in tuberculosis. *Ann N Y Acad Sci* 1990;**587**:59-69
29. Liu PT, Stenger S, Li H, et al. Toll-Like Receptor Triggering of a Vitamin D-Mediated Human Antimicrobial Response. *Science* 2006:1123933 doi: 10.1126/science.1123933[published Online First: Epub Date].
30. Coussens AK, Wilkinson RJ, Hanifa Y, et al. Vitamin D accelerates resolution of inflammatory responses during tuberculosis treatment. *Proc Natl Acad Sci* 2012:Epub
31. Martineau AR. Bolus-dose vitamin D and prevention of childhood pneumonia. *Lancet* 2012;**379**(9824):1373-5 doi: 10.1016/S0140-6736(12)60405-X[published Online First: Epub Date].
32. Babbe H, Roers A, Waisman A, et al. Clonal expansions of CD8(+) T cells dominate the T cell infiltrate in active multiple sclerosis lesions as shown by micromanipulation and single cell polymerase chain reaction. *J Exp Med* 2000;**192**(3):393-404

1  
2  
3 33. Veldman CM, Cantorna MT, DeLuca HF. Expression of 1,25-dihydroxyvitamin D(3)  
4 receptor in the immune system. Arch Biochem Biophys 2000;374(2):334-8 doi:  
5  
6 10.1006/abbi.1999.1605  
7  
8 S0003-9861(99)91605-3 [pii][published Online First: Epub Date].  
9  
10  
11  
12  
13  
14  
15  
16  
17  
18  
19  
20  
21  
22  
23  
24  
25  
26  
27  
28  
29  
30  
31  
32  
33  
34  
35  
36  
37  
38  
39  
40  
41  
42  
43  
44  
45  
46  
47  
48  
49  
50  
51  
52  
53  
54  
55  
56  
57  
58  
59  
60

For peer review only

1  
2  
3  
4  
5  
6  
7  
8  
9  
10  
11  
12  
13  
14  
15  
16  
17  
18  
19  
20  
21  
22  
23  
24  
25  
26  
27  
28  
29  
30  
31  
32  
33  
34  
35  
36  
37  
38  
39  
40  
41  
42  
43  
44  
45  
46  
47  
48  
49  
50  
51  
52  
53  
54  
55  
56  
57  
58  
59  
60

**Figure Legends**

1. Distribution of Vitamin D concentrations at baseline (nmol/L)
2. Distribution of Vitamin D concentrations by season of blood draw; Season 1: Dry (January-February); Season 2: Long Rains (March-June); Season 3: Dry (July-October); Season 4: Short Rains (November-December)

For peer review only

1  
2  
3  
4  
5  
6  
7  
8  
9  
10  
11  
12  
13  
14  
15  
16  
17  
18  
19  
20  
21  
22  
23  
24  
25  
26  
27  
28  
29  
30  
31  
32  
33  
34  
35  
36  
37  
38  
39  
40  
41  
42  
43  
44  
45  
46  
47  
48  
49  
50  
51  
52  
53  
54  
55  
56  
57  
58  
59  
60

**Tables**

| <b>Table 1</b>                                                  | <b>Baseline Characteristics of the Study Population (n=677)</b> |                                      |                                      |
|-----------------------------------------------------------------|-----------------------------------------------------------------|--------------------------------------|--------------------------------------|
|                                                                 |                                                                 | <b>HIV-infected<br/>(n=344)</b>      | <b>HIV-uninfected<br/>(n=333)</b>    |
| <b>Variable</b>                                                 |                                                                 | <b>Mean (Standard<br/>Deviation)</b> | <b>Mean (Standard<br/>Deviation)</b> |
| Age, years                                                      |                                                                 | 34.4 ± 8.6                           | 30.2 ± 9.2                           |
| Money spent on food per person per day,<br>Tanzanian Shillings* |                                                                 | 587.3 ± 445.9                        | 580.1 ± 684.2                        |
| Hemoglobin, g/dL                                                |                                                                 | 9.9 ± 1.8                            | 11.1 ± 1.7                           |
| Albumin, g/dL                                                   |                                                                 | 2.8 ± 1.0                            | 3.2 ± 1.1                            |
| CD3 T-cell count, cells/μL                                      |                                                                 | 1228.0 ± 608.5                       | 1195.9 ± 404.8                       |
| CD4 T-cell counts, cells/μL                                     |                                                                 | 327.2 ± 246.2                        | 709.2 ± 250.8                        |
| CD8 T-cell counts, cells/μL                                     |                                                                 | 826.9 ± 447.5                        | 427.5 ± 188.2                        |
| Log(10) Viral Load, copies/mL                                   |                                                                 | 4.6 ± 1.0                            | N/A                                  |
| Body Mass Index, kg/m <sup>2</sup>                              |                                                                 | 19.4 ± 2.8                           | 18.8 ± 2.5                           |
| Mid-Upper Arm Circumference, cm                                 |                                                                 | 23.4 ± 2.7                           | 23.1 ± 2.7                           |
| Follow-up time, days                                            |                                                                 | 916.8 ± 507.4                        | 1532.9 ± 331.4                       |
|                                                                 |                                                                 |                                      |                                      |
|                                                                 |                                                                 | <b>n (%)</b>                         | <b>n (%)</b>                         |
| Low Vitamin D (serum 25-hydroxyvitamin<br>D <75 nmol/L)         |                                                                 | 218 (63.4%)                          | 200 (60.1%)                          |

|  |                                                             |             |             |
|--|-------------------------------------------------------------|-------------|-------------|
|  |                                                             |             |             |
|  | Vitamin D deficiency (serum 25-hydroxyvitamin D <50 nmol/L) | 55 (16.0%)  | 51 (15.3%)  |
|  |                                                             |             |             |
|  | Sex                                                         |             |             |
|  | Male                                                        | 203 (59.0%) | 257 (77.2%) |
|  | Female                                                      | 141 (41.0%) | 76 (22.8%)  |
|  |                                                             |             |             |
|  | Center                                                      |             |             |
|  | Mwananyamala                                                | 79 (23.0%)  | 88 (26.4%)  |
|  | Temeke                                                      | 102 (29.7%) | 83 (24.9%)  |
|  | Tandale                                                     | 83 (24.1%)  | 91 (27.3%)  |
|  | Mbgala                                                      | 31 (9.0%)   | 70 (21.0%)  |
|  | Amana                                                       | 49 (14.2%)  | 1 (.3%)     |
|  |                                                             |             |             |
|  | Karnofsky Score <70%                                        | 45 (13.1%)  | 29 (8.7%)   |
|  |                                                             |             |             |
|  | Education Group                                             |             |             |
|  | None                                                        | 29 (8.4%)   | 36 (10.8%)  |
|  | Low <5years                                                 | 35 (10.2%)  | 31 (9.3%)   |
|  | Primary 5-8 years                                           | 238 (69.2%) | 233 (70.0%) |
|  | Secondary/University                                        | 42 (12.2%)  | 33 (9.9%)   |
|  |                                                             |             |             |

|  |                                       |             |             |
|--|---------------------------------------|-------------|-------------|
|  | Cohabits with a Partner               | 200 (58.1%) | 168 (50.5%) |
|  |                                       |             |             |
|  | Assets at home                        |             |             |
|  | None                                  | 92 (26.9%)  | 108 (32.4%) |
|  | One                                   | 89 (26.0%)  | 85 (25.5%)  |
|  | 2-3                                   | 122 (35.7%) | 114 (34.2%) |
|  | 4-5                                   | 39 (11.4%)  | 26 (7.8%)   |
|  |                                       |             |             |
|  | WHO HIV Disease Stage                 |             |             |
|  | 3                                     | 240 (90.9%) | N/A         |
|  | 4                                     | 24 (9.1%)   |             |
|  |                                       |             |             |
|  | CD4 T-cell categories, cells/ $\mu$ L |             |             |
|  | 0-199                                 | 97 (35.9%)  | 0 (.0%)     |
|  | 200-499                               | 116 (43.0%) | 69 (22.9%)  |
|  | 500+                                  | 57 (21.1%)  | 232 (77.1%) |
|  |                                       |             |             |
|  | WHO BMI Group, kg/m <sup>2</sup>      |             |             |
|  | <16                                   | 26 (7.7%)   | 33 (9.9%)   |
|  | 16-16.99                              | 37 (10.9%)  | 45 (13.6%)  |
|  | 17-18.49                              | 73 (21.5%)  | 88 (26.5%)  |
|  | 18.5-19.99                            | 79 (23.3%)  | 70 (21.1%)  |
|  | 20-21.99                              | 77 (22.7%)  | 69 (20.8%)  |

|                                                                         |     |            |           |
|-------------------------------------------------------------------------|-----|------------|-----------|
|                                                                         | 22+ | 47 (13.9%) | 27 (8.1%) |
|                                                                         |     |            |           |
| * 1 US Dollar $\cong$ 1000 Tanzanian Shillings at the time of the study |     |            |           |

For peer review only

| <b>Table 2</b>                   |                | <b>Vitamin D Status and Mortality and HIV Disease Progression in HIV-infected TB Patients</b> |                |                     |                |
|----------------------------------|----------------|-----------------------------------------------------------------------------------------------|----------------|---------------------|----------------|
|                                  |                | <b>Univariate</b>                                                                             |                | <b>Multivariate</b> |                |
| <b>Outcome</b>                   | <b>n/N (%)</b> | <b>RR (95% CI)</b>                                                                            | <b>p-value</b> | <b>RR (95% CI)</b>  | <b>p-value</b> |
| <b>Mortality</b>                 |                |                                                                                               |                |                     |                |
| Low Vitamin D (<75 nmol/L)       | 61/218 (28.0%) | 0.73 (0.50, 1.08)                                                                             | 0.12           | 0.70 (0.47, 1.04)   | 0.08           |
| Adequate Vitamin D               | 43/126 (34.1%) |                                                                                               |                |                     |                |
| Vitamin D deficient (<50 nmol/L) | 20/55 (36.4%)  | 1.34 (0.82, 2.18)                                                                             | 0.25           | 0.91 (0.55, 1.50)   | 0.71           |
| Not deficient                    | 84/289 (29.1%) |                                                                                               |                |                     |                |
| Continuous Vitamin D (nmol/L)    |                | 1.00 (0.99, 1.01)                                                                             | 0.49           | 1.01 (1.00, 1.02)   | 0.15           |
| <b>HIV Disease Progression</b>   |                |                                                                                               |                |                     |                |
| Low Vitamin D                    | 46/150         | 1.10 (0.67, 1.82)                                                                             | 0.71           | 1.08 (0.64, 1.82)   | 0.78           |



|                                                                                           |                      |         |  |                   |             |                   |
|-------------------------------------------------------------------------------------------|----------------------|---------|--|-------------------|-------------|-------------------|
|                                                                                           | (<75 nmol/L)         | (30.7%) |  |                   |             |                   |
|                                                                                           | Adequate             | 23/90   |  | Reference         |             | Reference         |
|                                                                                           | Vitamin D            | (25.6%) |  |                   |             |                   |
|                                                                                           |                      |         |  |                   |             |                   |
|                                                                                           | Vitamin D            | 14/34   |  | 1.91 (1.05, 3.44) | <b>0.03</b> | 1.48 (0.78, 2.82) |
|                                                                                           | deficient (<50       | (41.2%) |  |                   |             | 0.23              |
|                                                                                           | nmol/L)              |         |  |                   |             |                   |
|                                                                                           | Not deficient        | 55/206  |  | Reference         |             | Reference         |
|                                                                                           |                      | (26.7%) |  |                   |             |                   |
|                                                                                           |                      |         |  |                   |             |                   |
|                                                                                           | Continuous Vitamin D |         |  | 0.99 (0.98, 1.01) | 0.30        | 1.00 (0.99,       |
|                                                                                           | (nmol/L)             |         |  |                   |             | 1.01)             |
|                                                                                           |                      |         |  |                   |             | 0.57              |
|                                                                                           |                      |         |  |                   |             |                   |
| p-values obtained using Cox Proportional Hazards Regression; RR: Risk Ratio; 95%          |                      |         |  |                   |             |                   |
| CI: 95% Confidence Interval                                                               |                      |         |  |                   |             |                   |
| Multivariate analyses adjusted for Age, Karnofsky Score, Baseline Hemoglobin, Viral Load, |                      |         |  |                   |             |                   |
| HIV Status, CD4 Counts, and Micronutrient Supplementation                                 |                      |         |  |                   |             |                   |

| <b>Table 3</b>                                                                                      |                | <b>Vitamin D Status and Treatment Outcomes in TB Patients</b> |                |                    |                     |  |
|-----------------------------------------------------------------------------------------------------|----------------|---------------------------------------------------------------|----------------|--------------------|---------------------|--|
|                                                                                                     |                | <b>Univariate</b>                                             |                |                    | <b>Multivariate</b> |  |
| <b>Outcome</b>                                                                                      | <b>n/N (%)</b> | <b>RR (95% CI)</b>                                            | <b>p-value</b> | <b>RR (95% CI)</b> | <b>p-value</b>      |  |
| <b>Treatment Failure by 1 month post-treatment initiation</b>                                       |                |                                                               |                |                    |                     |  |
| Low Vitamin D (<75 nmol/L)                                                                          | 58/298 (19.5%) | 1.06 (0.72, 1.55)                                             | 0.77           | 1.02 (0.70, 1.49)  | 0.93                |  |
| Adequate Vitamin D                                                                                  | 34/185 (18.4%) |                                                               |                |                    |                     |  |
| Vitamin D deficient (<50 nmol/L)                                                                    | 15/75 (20.0%)  | 1.06 (0.65, 1.74)                                             | 0.82           | 1.13 (0.69, 1.86)  | 0.63                |  |
| Not deficient                                                                                       | 77/408 (18.9%) |                                                               |                |                    |                     |  |
| Continuous Vitamin D (nmol/L)                                                                       |                | 1.00 (0.99, 1.01)                                             | 0.49           | 1.00 (0.99, 1.01)  | 0.50                |  |
| <b>Any Relapse (relapse after 1 month post-treatment initiation if culture negative at 1 month)</b> |                |                                                               |                |                    |                     |  |
| Low Vitamin D (<75 nmol/L)                                                                          | 51/227 (22.5%) | 1.56 (0.98, 2.48)                                             | 0.06           | 1.66 (1.04, 2.64)  | <b>0.03</b>         |  |

|                                                                                                                                                     |                                        |                   |                   |      |                   |             |  |
|-----------------------------------------------------------------------------------------------------------------------------------------------------|----------------------------------------|-------------------|-------------------|------|-------------------|-------------|--|
|                                                                                                                                                     | nmol/L)                                |                   |                   |      |                   |             |  |
|                                                                                                                                                     | Adequate<br>Vitamin D                  | 21/146<br>(14.4%) |                   |      |                   |             |  |
|                                                                                                                                                     | Vitamin D<br>deficient (<50<br>nmol/L) | 13/56<br>(23.2%)  | 1.25 (0.73, 2.12) | 0.41 | 1.40 (0.82, 2.39) | 0.21        |  |
|                                                                                                                                                     | Not deficient                          | 59/317<br>(18.6%) |                   |      |                   |             |  |
|                                                                                                                                                     | Continuous Vitamin D<br>(nmol/L)       |                   | 0.99 (0.98, 1.00) | 0.06 | 0.99 (0.98, 1.00) | <b>0.04</b> |  |
| p-values obtained using Binomial Regression; RR: Risk Ratio; 95% CI: 95% Confidence Interval                                                        |                                        |                   |                   |      |                   |             |  |
| Multivariate analyses adjusted for Age, Karnofsky Score, Baseline Hemoglobin, Viral Load, HIV Status, CD4 Counts, and Micronutrient Supplementation |                                        |                   |                   |      |                   |             |  |

1  
2  
3  
4  
5  
6  
7  
8  
9  
10  
11  
12  
13  
14  
15  
16  
17  
18  
19  
20  
21  
22  
23  
24  
25  
26  
27  
28  
29  
30  
31  
32  
33  
34  
35  
36  
37  
38  
39  
40  
41  
42  
43  
44  
45  
46  
47  
48  
49

| Table 4                                        | Vitamin D Status and T-cell Counts (cells/ $\mu$ L) in TB Patients |                                                                          |                                                                                 |  |         |                                                                          |                                                                                 |                                                                                 |  |         |                                                                   |                                                                     |                                                                                 |         |
|------------------------------------------------|--------------------------------------------------------------------|--------------------------------------------------------------------------|---------------------------------------------------------------------------------|--|---------|--------------------------------------------------------------------------|---------------------------------------------------------------------------------|---------------------------------------------------------------------------------|--|---------|-------------------------------------------------------------------|---------------------------------------------------------------------|---------------------------------------------------------------------------------|---------|
|                                                | CD4 T-cells                                                        |                                                                          |                                                                                 |  |         | CD8 T-cells                                                              |                                                                                 |                                                                                 |  |         | CD3 T-cells                                                       |                                                                     |                                                                                 |         |
| Outcome                                        |                                                                    | Adequate<br>vitamin D,<br>mean<br>difference<br>(95%<br>CI) <sup>a</sup> | Low<br>vitamin D,<br>adjusted<br>mean<br>difference<br>(95%<br>CI) <sup>c</sup> |  | p-value | Adequate<br>vitamin D,<br>mean<br>difference<br>(95%<br>CI) <sup>a</sup> | Low<br>vitamin D,<br>adjusted<br>mean<br>difference<br>(95%<br>CI) <sup>b</sup> | Low<br>vitamin D,<br>adjusted<br>mean<br>difference<br>(95%<br>CI) <sup>c</sup> |  | p-value | Adequate<br>vitamin D,<br>mean<br>difference<br>(SD) <sup>a</sup> | Low<br>vitamin D,<br>mean<br>difference<br>(95%<br>CI) <sup>b</sup> | Low<br>vitamin D,<br>adjusted<br>mean<br>difference<br>(95%<br>CI) <sup>c</sup> | p-value |
| <b>Entire follow-up: HIV-infected patients</b> |                                                                    |                                                                          |                                                                                 |  |         |                                                                          |                                                                                 |                                                                                 |  |         |                                                                   |                                                                     |                                                                                 |         |

1  
2  
3  
4  
5  
6  
7  
8  
9  
10  
11  
12  
13  
14  
15  
16  
17  
18  
19  
20  
21  
22  
23  
24  
25  
26  
27  
28  
29  
30  
31  
32  
33  
34  
35  
36  
37  
38  
39  
40  
41  
42  
43  
44  
45  
46  
47  
48  
49

|                                                  |              |              |              |          |              |               |               |                         |               |                 |                |                        |
|--------------------------------------------------|--------------|--------------|--------------|----------|--------------|---------------|---------------|-------------------------|---------------|-----------------|----------------|------------------------|
| Low Vitamin D (<75 nmol/L)                       | 300<br>(234) | 17 (-23, 56) | 21 (-18, 59) | 0.2<br>9 | 902<br>(457) | 88 (7, 169)   | 85 (4, 165)   | <b>0.0</b><br><b>4</b>  | 1298<br>(635) | 101 (-4, 206)   | 103 (-5, 212)  | 0.0<br>6               |
| Vitamin D deficient (<50 nmol/L)                 | 333<br>(225) | 21 (-34, 76) | 30 (-26, 86) | 0.2<br>9 | 957<br>(424) | 105 (-9, 219) | 114 (-6, 234) | 0.0<br>6                | 1392<br>(595) | 104 (-47, 255)  | 125 (-28, 279) | 0.1<br>1               |
| Continuous Vitamin D (per nmol/L)                |              | 0 (-1, 1)    | -1 (-1, 0)   | 0.2<br>6 |              | -3 (-5, -1)   | -3 (-5, -1)   | <b>0.0</b><br><b>04</b> |               | -3 (-5, -1)     | -3 (-6, -1)    | <b>0.0</b><br><b>1</b> |
| <b>Entire follow-up: HIV-uninfected patients</b> |              |              |              |          |              |               |               |                         |               |                 |                |                        |
| Low Vitamin D (<75 nmol/L)                       | 771<br>(235) | -2 (-49, 49) | 3 (-45, 51)  | 0.9<br>1 | 508<br>(209) | -25 (-63, 14) | -22 (-60, 17) | 0.2<br>7                | 1351<br>(400) | -37 (-109, 109) | -28 (-99, 44)  | 0.4<br>5               |

1  
2  
3  
4  
5  
6  
7  
8  
9  
10  
11  
12  
13  
14  
15  
16  
17  
18  
19  
20  
21  
22  
23  
24  
25  
26  
27  
28  
29  
30  
31  
32  
33  
34  
35  
36  
37  
38  
39  
40  
41  
42  
43  
44  
45  
46  
47  
48  
49

|                                                           |                                   |           |               |                |                        |           |               |               |                        |            |                |                |                        |
|-----------------------------------------------------------|-----------------------------------|-----------|---------------|----------------|------------------------|-----------|---------------|---------------|------------------------|------------|----------------|----------------|------------------------|
|                                                           |                                   | )         | 45)           |                |                        | )         |               |               |                        |            | 35)            |                |                        |
|                                                           |                                   |           |               |                |                        |           |               |               |                        |            |                |                |                        |
|                                                           | Vitamin D deficient (<50 nmol/L)  | 781 (241) | -34 (-99, 30) | -34 (-101, 32) | 0.3<br>1               | 500 (195) | -1 (-64, 62)  | 3 (-61, 67)   | 0.9<br>3               | 1354 (397) | -33 (-136, 71) | -28 (-134, 79) | 0.6<br>1               |
|                                                           |                                   |           |               |                |                        |           |               |               |                        |            |                |                |                        |
|                                                           | Continuous Vitamin D (per nmol/L) |           | 0 (-1, 1)     | 0 (-1, 1)      | 0.9<br>7               |           | 0 (-1, 1)     | 0 (-1, 1)     | 0.8<br>3               |            | 0 (-1, 2)      | 0 (-2, 2)      | 0.9<br>0               |
|                                                           |                                   |           |               |                |                        |           |               |               |                        |            |                |                |                        |
| <b>First 8 months of follow-up: HIV-infected patients</b> |                                   |           |               |                |                        |           |               |               |                        |            |                |                |                        |
|                                                           | Low Vitamin D (<75 nmol/L)        | 316 (237) | 54 (8, 100)   | 58 (13, 104)   | <b>0.0</b><br><b>1</b> | 868 (470) | 132 (29, 235) | 119 (15, 223) | <b>0.0</b><br><b>2</b> | 1279 (670) | 190 (42, 337)  | 179 (28, 331)  | <b>0.0</b><br><b>2</b> |
|                                                           |                                   |           |               |                |                        |           |               |               |                        |            |                |                |                        |

1  
2  
3  
4  
5  
6  
7  
8  
9  
10  
11  
12  
13  
14  
15  
16  
17  
18  
19  
20  
21  
22  
23  
24  
25  
26  
27  
28  
29  
30  
31  
32  
33  
34  
35  
36  
37  
38  
39  
40  
41  
42  
43  
44  
45  
46  
47  
48  
49

|                                                             |              |              |               |             |              |               |               |             |               |                |                |             |
|-------------------------------------------------------------|--------------|--------------|---------------|-------------|--------------|---------------|---------------|-------------|---------------|----------------|----------------|-------------|
| Vitamin D deficient (<50 nmol/L)                            | 372<br>(264) | 36 (-25, 97) | 41 (-20, 101) | 0.19        | 963<br>(471) | 63 (-77, 203) | 75 (-72, 221) | 0.32        | 1443<br>(689) | 67 (-125, 259) | 101 (-93, 295) | 0.31        |
| Continuous Vitamin D (per nmol/L)                           |              | -1 (-2, 0)   | -1 (-2, 0)    | <b>0.01</b> |              | -4 (-6, -1)   | -4 (-6, -1)   | <b>0.02</b> |               | -4 (-7, -1)    | -5 (-8, -2)    | <b>0.03</b> |
| <b>First 8 months of follow-up: HIV-uninfected patients</b> |              |              |               |             |              |               |               |             |               |                |                |             |
| Low Vitamin D (<75 nmol/L)                                  | 724<br>(243) | 1 (-52, 53)  | 6 (-47, 59)   | 0.82        | 461<br>(232) | -22 (-63, 20) | -17 (-57, 22) | 0.39        | 1248<br>(446) | -38 (-121, 46) | -27 (-106, 52) | 0.50        |
| Vitamin D deficient (<50 nmol/L)                            | 731<br>(237) | -7 (-95, 96) | -7 (-81, 81)  | 0.87        | 454<br>(209) | 4 (-73, 81)   | 5 (-71, 81)   | 0.90        | 1247<br>(410) | 14 (-124, 123) | 17 (-123, 123) | 0.82        |

1  
2  
3  
4  
5  
6  
7  
8  
9  
10  
11  
12  
13  
14  
15  
16  
17  
18  
19  
20  
21  
22  
23  
24  
25  
26  
27  
28  
29  
30  
31  
32  
33  
34  
35  
36  
37  
38  
39  
40  
41  
42  
43  
44  
45  
46  
47  
48  
49

|  |                                         |   |              |              |          |  |              |              |          |  |              |           |          |
|--|-----------------------------------------|---|--------------|--------------|----------|--|--------------|--------------|----------|--|--------------|-----------|----------|
|  | nmol/L)                                 | ) | 80)          | )            |          |  |              |              |          |  | 153)         | 156)      |          |
|  |                                         |   |              |              |          |  |              |              |          |  |              |           |          |
|  | Continuous<br>Vitamin D (per<br>nmol/L) |   | 0 (-<br>2,1) | 0 (-<br>2,1) | 0.5<br>4 |  | 0 (-1,<br>1) | 0 (-1,<br>1) | 0.7<br>3 |  | 0 (-2,<br>1) | 0 (-2, 1) | 0.5<br>7 |
|  |                                         |   |              |              |          |  |              |              |          |  |              |           |          |

<sup>a</sup>Data are the means (SD) of the average measurement during follow-up for each participant

<sup>b</sup>Data are the mean difference between the low and the adequate vitamin D group, as defined in Column B. The mean differences, 95% confidence intervals (CIs), and corresponding p-values were estimated from generalized estimating equations, after adjustment for baseline measurements, follow-up time, and treatment (micronutrients vs. placebo) group.

<sup>c</sup>Multivariate analyses additionally adjusted for Age, Karnofsky Score, and Baseline Hemoglobin



| Table 5 Vitamin D Status and Nutritional Parameters in TB Patients |                                            |                                                      |                                                               |         |                                            |                                                      |                                                               |         |                                            |                                                      |                                                               |         |
|--------------------------------------------------------------------|--------------------------------------------|------------------------------------------------------|---------------------------------------------------------------|---------|--------------------------------------------|------------------------------------------------------|---------------------------------------------------------------|---------|--------------------------------------------|------------------------------------------------------|---------------------------------------------------------------|---------|
| Outcome                                                            | Body Mass Index (kg/m <sup>2</sup> )       |                                                      |                                                               |         | Albumin concentration (g/dL)               |                                                      |                                                               |         | Hemoglobin concentration (g/dL)            |                                                      |                                                               |         |
|                                                                    | Adequate vitamin D, mean (SD) <sup>a</sup> | Low vitamin D, mean difference (95% CI) <sup>b</sup> | Low vitamin D, adjusted mean difference (95% CI) <sup>c</sup> | p-value | Adequate vitamin D, mean (SD) <sup>a</sup> | Low vitamin D, mean difference (95% CI) <sup>b</sup> | Low vitamin D, adjusted mean difference (95% CI) <sup>c</sup> | p-value | Adequate vitamin D, mean (SD) <sup>a</sup> | Low vitamin D, mean difference (95% CI) <sup>b</sup> | Low vitamin D, adjusted mean difference (95% CI) <sup>c</sup> | p-value |
| Entire follow-up:                                                  |                                            |                                                      |                                                               |         |                                            |                                                      |                                                               |         |                                            |                                                      |                                                               |         |

1  
2  
3  
4  
5  
6  
7  
8  
9  
10  
11  
12  
13  
14  
15  
16  
17  
18  
19  
20  
21  
22  
23  
24  
25  
26  
27  
28  
29  
30  
31  
32  
33  
34  
35  
36  
37  
38  
39  
40  
41  
42  
43  
44  
45  
46  
47  
48  
49

|                                   |                 |                        |                        |      |                |                        |                       |          |                 |                        |                        |          |  |
|-----------------------------------|-----------------|------------------------|------------------------|------|----------------|------------------------|-----------------------|----------|-----------------|------------------------|------------------------|----------|--|
| <b>All patients</b>               |                 |                        |                        |      |                |                        |                       |          |                 |                        |                        |          |  |
| Low Vitamin D (<75 nmol/L)        | 21.20<br>(2.80) | -0.06<br>(-0.30, 0.17) | -0.08<br>(-0.30, 0.14) | 0.46 | 3.42<br>(0.74) | -0.05<br>(-0.14, 0.04) | 0.00<br>(-0.08, 0.08) | 0.9<br>7 | 12.65<br>(1.80) | -0.16<br>(-0.40, 0.08) | -0.18<br>(-0.41, 0.05) | 0.<br>12 |  |
| Vitamin D deficient (<50 nmol/L)  | 21.23<br>(3.00) | -0.16<br>(-0.46, 0.14) | -0.14<br>(-0.44, 0.15) | 0.34 | 3.42<br>(0.72) | -0.05<br>(-0.17, 0.07) | 0.02<br>(-0.08, 0.13) | 0.65     | 12.42<br>(1.87) | 0.15<br>(-0.16, 0.45)  | 0.17<br>(-0.11, 0.45)  | 0.2<br>4 |  |
| Continuous Vitamin D (per nmol/L) |                 | 0.00<br>(0.00, 0.01)   | 0.00<br>(0.00,         | 0.30 |                | 0.002<br>(0.00,        | 0.000<br>(-           | 0.90     |                 | 0.00<br>(-0.01,        | 0.00<br>(0.00,         | 0.8<br>5 |  |

|                                                  |                 |                         |                         |             |  |                |                        |                       |      |                 |                        |                        |          |
|--------------------------------------------------|-----------------|-------------------------|-------------------------|-------------|--|----------------|------------------------|-----------------------|------|-----------------|------------------------|------------------------|----------|
|                                                  |                 |                         | 0.01)                   |             |  |                | 0.004)                 | 0.002,                |      |                 | 0.01)                  | 0.01)                  |          |
|                                                  |                 |                         |                         |             |  |                |                        | 0.002)                |      |                 |                        |                        |          |
| <b>First 8 months of follow-up: All patients</b> |                 |                         |                         |             |  |                |                        |                       |      |                 |                        |                        |          |
| Low Vitamin D (<75 nmol/L)                       | 20.96<br>(2.73) | -0.20<br>(-0.40, -0.01) | -0.21<br>(-0.39, -0.02) | <b>0.03</b> |  | 3.42<br>(1.09) | -0.01<br>(-0.18, 0.16) | 0.04<br>(-0.13, 0.21) | 0.65 | 12.12<br>(1.85) | -0.01<br>(-0.28, 0.26) | -0.04<br>(-0.31, 0.23) | 0.7<br>8 |
| Vitamin D                                        | 20.85<br>(2.84) | 0.00<br>(-0.25, 0.25)   | 0.04<br>(-0.21,         | 0.78        |  | 3.41<br>(1.08) | -0.11<br>(-0.32,       | -0.05<br>(-0.27,      | 0.64 | 11.92<br>(1.99) | 0.16<br>(-0.18,        | 0.21<br>(-0.10,        | 0.1<br>9 |

1  
2  
3  
4  
5  
6  
7  
8  
9  
10  
11  
12  
13  
14  
15  
16  
17  
18  
19  
20  
21  
22  
23  
24  
25  
26  
27  
28  
29  
30  
31  
32  
33  
34  
35  
36  
37  
38  
39  
40  
41  
42  
43  
44  
45  
46  
47  
48  
49

1  
2  
3  
4  
5  
6  
7  
8  
9  
10  
11  
12  
13  
14  
15  
16  
17  
18  
19  
20  
21  
22  
23  
24  
25  
26  
27  
28  
29  
30  
31  
32  
33  
34  
35  
36  
37  
38  
39  
40  
41  
42  
43  
44  
45  
46  
47  
48  
49

|                                      |              |                 |       |  |  |                        |                        |       |  |  |                  |                  |       |  |
|--------------------------------------|--------------|-----------------|-------|--|--|------------------------|------------------------|-------|--|--|------------------|------------------|-------|--|
| deficient<br>( $<50$<br>nmol/L)      |              |                 | 0.29) |  |  |                        | 0.10)                  | 0.17) |  |  |                  | 0.50)            | 0.53) |  |
|                                      |              |                 |       |  |  |                        |                        |       |  |  |                  |                  |       |  |
| Continuous Vitamin<br>D (per nmol/L) | 0.00         | 0.00            | 0.38  |  |  | 0.000                  | 0.000                  | 0.87  |  |  | 0.00             | 0.00             | 0.5   |  |
|                                      | (0.00, 0.01) | (0.00,<br>0.01) |       |  |  | (-<br>0.003,<br>0.005) | (-<br>0.004,<br>0.004) |       |  |  | (-0.01,<br>0.00) | (-0.01,<br>0.00) | 7     |  |

<sup>a</sup>Data are the means (SD) of the average measurement during follow-up for each participant

<sup>b</sup>Data are the mean difference between the low and the adequate vitamin D group, as defined in Column B. The mean differences, 95% confidence intervals (CIs), and corresponding p-values were estimated from generalized estimating equations, after adjustment for baseline measurements, follow-up time, and treatment (micronutrients vs. placebo) group.

<sup>c</sup>Multivariate analyses additionally adjusted for Age, Karnofsky Score, Baseline Hemoglobin, Viral Load, CD4 Count, and HIV Status; HIV status removed from the model where the results are stratified by HIV status. Viral Load also removed from the model in HIV-

1  
2  
3  
4  
5  
6  
7  
8  
9  
10  
11  
12  
13  
14  
15  
16  
17  
18  
19  
20  
21  
22  
23  
24  
25  
26  
27  
28  
29  
30  
31  
32  
33  
34  
35  
36  
37  
38  
39  
40  
41  
42  
43  
44  
45  
46  
47  
48  
49

uninfected individuals.

For peer review only

1  
2  
3  
4  
5  
6  
7  
8  
9  
10  
11  
12  
13  
14  
15  
16  
17  
18  
19  
20  
21  
22  
23  
24  
25  
26  
27  
28  
29  
30  
31  
32  
33  
34  
35  
36  
37  
38  
39  
40  
41  
42  
43  
44  
45  
46  
47  
48  
49  
50  
51  
52  
53  
54  
55  
56  
57  
58  
59  
60

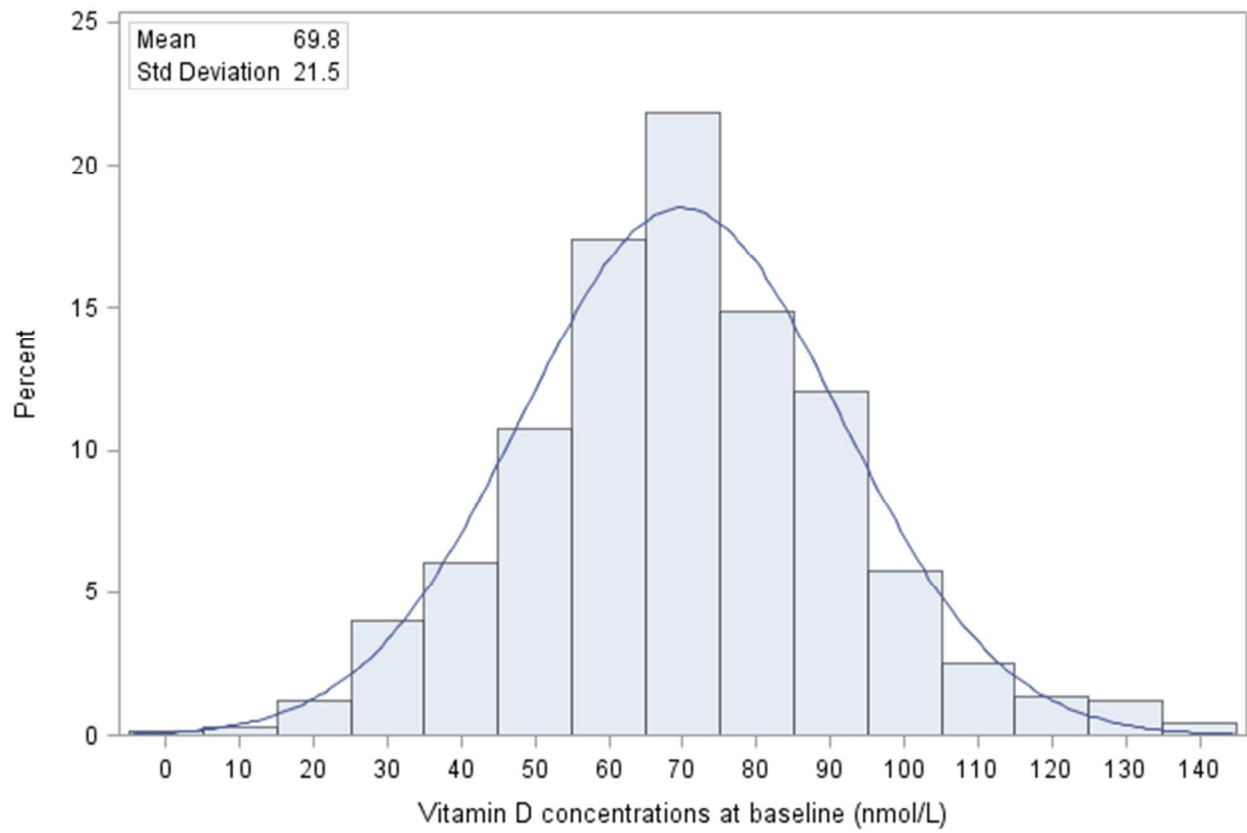

review only

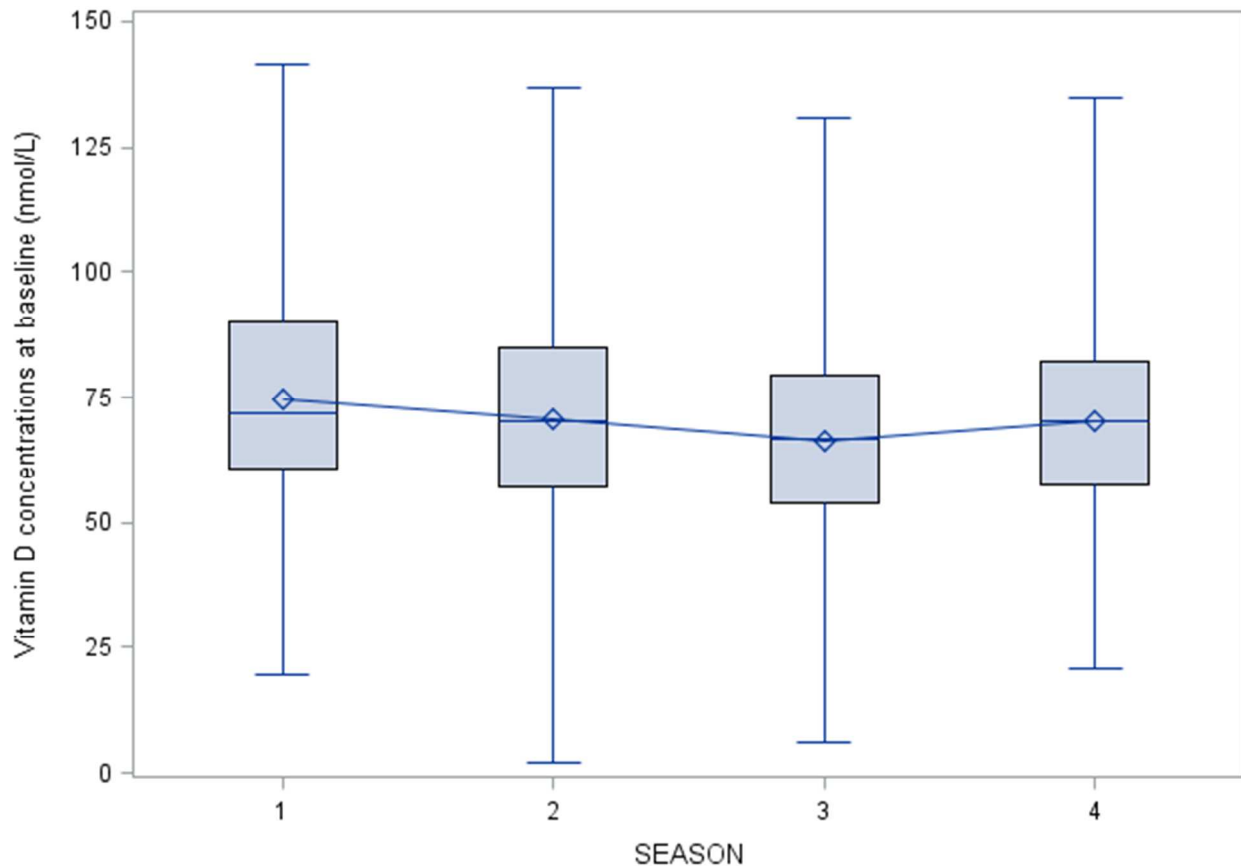

Review only

1  
2  
3  
4  
5  
6  
7  
8  
9  
10  
11  
12  
13  
14  
15  
16  
17  
18  
19  
20  
21  
22  
23  
24  
25  
26  
27  
28  
29  
30  
31  
32  
33  
34  
35  
36  
37  
38  
39  
40  
41  
42  
43  
44  
45  
46  
47  
48  
49  
50  
51  
52  
53  
54  
55  
56  
57  
58  
59  
60

| Supplemental Table 1                                                  |                          | Correlates of Low Vitamin D Status (25(OH)D < 75 nmol/L) in HIV-uninfected TB patients |              |                       |              |
|-----------------------------------------------------------------------|--------------------------|----------------------------------------------------------------------------------------|--------------|-----------------------|--------------|
|                                                                       |                          | Univariate (p<0.20)                                                                    |              | Multivariate (p<0.05) |              |
| <i>Variable</i>                                                       |                          | RR (95% CI)                                                                            | p-value      | RR (95% CI)           | p-value      |
| Season                                                                |                          |                                                                                        | <b>0.002</b> |                       | <b>0.002</b> |
|                                                                       | 1: Dry (Jan-Feb)         | Ref.                                                                                   |              | Ref.                  |              |
|                                                                       | 2: Long Rains (Mar-Jun)  | 1.07 (0.74, 1.53)                                                                      |              | 1.09 (0.76, 1.56)     |              |
|                                                                       | 3: Dry (Jul-Oct)         | 1.50 (1.07, 2.09)                                                                      |              | 1.50 (1.08, 2.08)     |              |
|                                                                       | 4: Short Rains (Nov-Dec) | 1.29 (0.84, 1.96)                                                                      |              | 1.26 (0.84, 1.90)     |              |
| Sex                                                                   |                          |                                                                                        |              |                       |              |
|                                                                       | Female                   | 1.19 (0.99, 1.43)                                                                      | 0.07         |                       |              |
| Cohabits with a partner                                               |                          | 0.89 (0.75, 1.06)                                                                      | 0.19         |                       |              |
| Money spent per person per day on food, per 1000 Tanzanian Shillings* |                          | 0.76 (0.59, 0.98)                                                                      | <b>0.04</b>  | 0.76 (0.59, 0.98)     | <b>0.03</b>  |
| Money spent per person per day on food quartiles                      |                          |                                                                                        | 0.14         |                       |              |
|                                                                       | 0:<250                   | 1.36 (1.03, 1.80)                                                                      |              |                       |              |
|                                                                       | 1:250-499                | 1.11 (0.82, 1.52)                                                                      |              |                       |              |
|                                                                       | 2:500-750                | 1.13 (0.84, 1.53)                                                                      |              |                       |              |
|                                                                       | 3:>750                   | Ref.                                                                                   |              |                       |              |
| AFB Culture positive at baseline                                      |                          | 1.17 (0.94, 1.46)                                                                      | 0.16         |                       |              |
| Number of colonies in AFB culture                                     |                          |                                                                                        | 0.16         |                       |              |
|                                                                       | 1                        | Ref.                                                                                   |              |                       |              |
|                                                                       | 2                        | 1.01 (0.66, 1.56)                                                                      |              |                       |              |
|                                                                       | 3                        | 0.95 (0.63, 1.44)                                                                      |              |                       |              |
|                                                                       | 4                        | 1.05 (0.70, 1.58)                                                                      |              |                       |              |



|                                           |             |                   |              |                   |             |
|-------------------------------------------|-------------|-------------------|--------------|-------------------|-------------|
|                                           | 5           | 1.27 (1.01, 1.59) |              |                   |             |
| Received TB treatment in the past 5 years |             | 1.41 (0.97, 2.04) | 0.07         |                   |             |
| Hemoglobin, g/dL                          |             | 0.92 (0.87, 0.97) | <b>0.004</b> |                   |             |
| CD4 T-cells, 100 cells/ $\mu$ L           |             | 1.03 (0.99, 1.07) | 0.12         |                   |             |
| CD3 T-cells, 100 cells/ $\mu$ L           |             | 1.02 (1.00, 1.04) | 0.12         |                   |             |
| Depressed >2 weeks, ever                  |             | 1.17 (0.97, 1.42) | 0.10         |                   |             |
| Dysentery                                 |             | 0.23 (0.04, 1.41) | 0.11         |                   |             |
| Outpatient visit                          |             | 1.14 (0.95, 1.38) | 0.16         |                   |             |
| Skin rash                                 |             | 0.73 (0.46, 1.16) | 0.18         |                   |             |
| Height quartiles, cm                      |             |                   | <b>0.01</b>  |                   | <b>0.01</b> |
|                                           | <158.1      | Ref.              |              | Ref.              |             |
|                                           | 158.1-164.0 | 1.08 (0.87, 1.32) |              | 1.12 (0.93, 1.36) |             |
|                                           | 164.1-169.5 | 0.76 (0.59, 0.98) |              | 0.82 (0.64, 1.04) |             |
|                                           | 169.6+      | 0.77 (0.60, 0.99) |              | 0.81 (0.64, 1.03) |             |
| Weight, kg                                |             | 0.99 (0.97, 1.00) | <b>0.03</b>  |                   |             |
| WHO BMI groups, kg/m <sup>2</sup>         |             |                   | 0.14         |                   |             |
|                                           | <16         | 1.14 (0.88, 1.48) |              |                   |             |
|                                           | 16-16.99    | 0.98 (0.74, 1.29) |              |                   |             |
|                                           | 17-18.49    | Ref.              |              |                   |             |
|                                           | 18.5-19.99  | 0.76 (0.57, 1.02) |              |                   |             |
|                                           | 20-21.99    | 0.89 (0.68, 1.15) |              |                   |             |
|                                           | 22+         | 1.11 (0.83, 1.48) |              |                   |             |
| Mid-Upper Arm Circumference (MUAC) <22 cm |             | 1.27 (1.07, 1.51) | <b>0.01</b>  |                   |             |
| Triceps Skinfold Thickness,               |             | 1.02 (1.00, 1.03) | 0.09         |                   |             |

1  
2  
3  
4  
5  
6  
7  
8  
9  
10  
11  
12  
13  
14  
15  
16  
17  
18  
19  
20  
21  
22  
23  
24  
25  
26  
27  
28  
29  
30  
31  
32  
33  
34  
35  
36  
37  
38  
39  
40  
41  
42  
43  
44  
45  
46  
47  
48  
49  
50  
51  
52  
53  
54  
55  
56  
57  
58  
59  
60

|                                                                                                                                                                       |  |  |  |  |  |  |
|-----------------------------------------------------------------------------------------------------------------------------------------------------------------------|--|--|--|--|--|--|
| cm                                                                                                                                                                    |  |  |  |  |  |  |
|                                                                                                                                                                       |  |  |  |  |  |  |
| p-values obtained using Binomial Regression; RR: Risk Ratio; 95% CI: 95% Confidence Interval; * 1 US Dollar $\cong$ 1000 Tanzanian Shillings at the time of the study |  |  |  |  |  |  |

For peer review only

| Supplemental Table 2                      |              | Correlates of Low Vitamin D Status (serum 25(OH)D <75 nmol/L) in HIV-infected TB patients |             |                       |              |
|-------------------------------------------|--------------|-------------------------------------------------------------------------------------------|-------------|-----------------------|--------------|
|                                           |              | Univariate (p<0.20)                                                                       |             | Multivariate (p<0.05) |              |
| Variable                                  |              | RR (95% CI)                                                                               | P-value     | RR (95% CI)           | P-value      |
| Age                                       |              | 0.99 (0.98, 1.00)                                                                         | <b>0.01</b> |                       |              |
| Center                                    |              |                                                                                           | <b>0.03</b> |                       |              |
|                                           | Mwananyamala | 1.05 (0.86, 1.27)                                                                         |             |                       |              |
|                                           | Temeke       | Ref.                                                                                      |             |                       |              |
|                                           | Tandale      | 0.80 (0.63, 1.02)                                                                         |             |                       |              |
|                                           | Mbgala       | 0.67 (0.44, 1.01)                                                                         |             |                       |              |
|                                           | Amana        | 1.03 (0.82, 1.29)                                                                         |             |                       |              |
| Cohabits with a partner                   |              | 0.90 (0.77, 1.05)                                                                         | 0.19        |                       |              |
| Assets at home                            |              |                                                                                           | 0.07        |                       |              |
|                                           | 0:none       | 1.36 (1.03, 1.80)                                                                         |             |                       |              |
|                                           | 1:one        | 0.88 (0.66, 1.16)                                                                         |             |                       |              |
|                                           | 2:2-3        | 0.87 (0.67, 1.14)                                                                         |             |                       |              |
|                                           | 3:4-5        | Ref.                                                                                      |             |                       |              |
| Received TB treatment in the past 5 years |              | 0.58 (0.31, 1.10)                                                                         | 0.10        |                       |              |
| Hemoglobin, g/dL                          |              | 0.95 (0.90, 1.00)                                                                         | <b>0.04</b> | 0.93 (0.89, 0.98)     | <b>0.007</b> |
| Albumin, U/L                              |              | 0.93 (0.86, 1.02)                                                                         | 0.13        |                       |              |
| CD4 T-cells, 100 cells/ $\mu$ L           |              | 1.02 (0.99, 1.05)                                                                         | 0.12        | 1.04 (1.01, 1.07)     | <b>0.02</b>  |
| Depressed >2 weeks, ever                  |              | 0.80 (0.61, 1.05)                                                                         | 0.11        |                       |              |
| Hospitalization                           |              | 1.30 (0.94, 1.80)                                                                         | 0.11        |                       |              |
| Skin rash                                 |              | 1.32 (1.07, 1.64)                                                                         | <b>0.01</b> |                       |              |
| Extrapulmonary TB                         |              | 1.35 (0.93, 1.96)                                                                         | 0.11        |                       |              |

|                                                                                              |            |                   |             |  |  |
|----------------------------------------------------------------------------------------------|------------|-------------------|-------------|--|--|
| Height, cm                                                                                   |            | 0.99 (0.98, 1.00) | 0.08        |  |  |
| Weight, kg                                                                                   |            | 0.99 (0.98, 1.00) | 0.11        |  |  |
| WHO Body Mass Index (BMI) groups, kg/m <sup>2</sup>                                          |            |                   | 0.06        |  |  |
|                                                                                              | <16        | 0.81 (0.57, 1.16) |             |  |  |
|                                                                                              | 16-16.99   | 0.99 (0.76, 1.27) |             |  |  |
|                                                                                              | 17-18.49   | Ref.              |             |  |  |
|                                                                                              | 18.5-19.99 | 0.80 (0.63, 1.02) |             |  |  |
|                                                                                              | 20-21.99   | 0.75 (0.58, 0.96) |             |  |  |
|                                                                                              | 22+        | 1.05 (0.84, 1.30) |             |  |  |
| Mid-Upper Arm Circumference (MUAC) quartiles, cm                                             |            |                   | <b>0.02</b> |  |  |
|                                                                                              | <=21       | Ref.              |             |  |  |
|                                                                                              | 21.1-23.0  | 1.09 (0.90, 1.32) |             |  |  |
|                                                                                              | 23.1-24.9  | 0.81 (0.61, 1.08) |             |  |  |
|                                                                                              | 25+        | 0.82 (0.66, 1.03) |             |  |  |
| p-values obtained using Binomial Regression; RR: Risk Ratio; 95% CI: 95% Confidence Interval |            |                   |             |  |  |

STROBE 2007 (v4) Statement—Checklist of items that should be included in reports of *cohort studies*

| Section/Topic                | Item # | Recommendation                                                                                                                                                                       | Reported on page # |
|------------------------------|--------|--------------------------------------------------------------------------------------------------------------------------------------------------------------------------------------|--------------------|
| Title and abstract           | 1      | (a) Indicate the study's design with a commonly used term in the title or the abstract                                                                                               | 2                  |
|                              |        | (b) Provide in the abstract an informative and balanced summary of what was done and what was found                                                                                  | 2-3                |
| <b>Introduction</b>          |        |                                                                                                                                                                                      |                    |
| Background/rationale         | 2      | Explain the scientific background and rationale for the investigation being reported                                                                                                 | 5                  |
| Objectives                   | 3      | State specific objectives, including any prespecified hypotheses                                                                                                                     | 6                  |
| <b>Methods</b>               |        |                                                                                                                                                                                      |                    |
| Study design                 | 4      | Present key elements of study design early in the paper                                                                                                                              | 6-8                |
| Setting                      | 5      | Describe the setting, locations, and relevant dates, including periods of recruitment, exposure, follow-up, and data collection                                                      | 6-8                |
| Participants                 | 6      | (a) Give the eligibility criteria, and the sources and methods of selection of participants. Describe methods of follow-up                                                           | 6-8                |
|                              |        | (b) For matched studies, give matching criteria and number of exposed and unexposed                                                                                                  | NA                 |
| Variables                    | 7      | Clearly define all outcomes, exposures, predictors, potential confounders, and effect modifiers. Give diagnostic criteria, if applicable                                             | 6, 9               |
| Data sources/<br>measurement | 8*     | For each variable of interest, give sources of data and details of methods of assessment (measurement). Describe comparability of assessment methods if there is more than one group | 9-10               |
| Bias                         | 9      | Describe any efforts to address potential sources of bias                                                                                                                            | 10                 |
| Study size                   | 10     | Explain how the study size was arrived at                                                                                                                                            | 10                 |
| Quantitative variables       | 11     | Explain how quantitative variables were handled in the analyses. If applicable, describe which groupings were chosen and why                                                         | 10                 |
| Statistical methods          | 12     | (a) Describe all statistical methods, including those used to control for confounding                                                                                                | 9-10               |
|                              |        | (b) Describe any methods used to examine subgroups and interactions                                                                                                                  | 9-10               |
|                              |        | (c) Explain how missing data were addressed                                                                                                                                          | 9-10               |
|                              |        | (d) If applicable, explain how loss to follow-up was addressed                                                                                                                       | 9-10               |
|                              |        | (e) Describe any sensitivity analyses                                                                                                                                                | NA                 |
| <b>Results</b>               |        |                                                                                                                                                                                      |                    |

|                          |     |                                                                                                                                                                                                              |            |
|--------------------------|-----|--------------------------------------------------------------------------------------------------------------------------------------------------------------------------------------------------------------|------------|
| Participants             | 13* | (a) Report numbers of individuals at each stage of study—eg numbers potentially eligible, examined for eligibility, confirmed eligible, included in the study, completing follow-up, and analysed            | 10, Tables |
|                          |     | (b) Give reasons for non-participation at each stage                                                                                                                                                         | NA         |
|                          |     | (c) Consider use of a flow diagram                                                                                                                                                                           | NA         |
| Descriptive data         | 14* | (a) Give characteristics of study participants (eg demographic, clinical, social) and information on exposures and potential confounders                                                                     | 10-11      |
|                          |     | (b) Indicate number of participants with missing data for each variable of interest                                                                                                                          | 10         |
|                          |     | (c) Summarise follow-up time (eg, average and total amount)                                                                                                                                                  | 11         |
| Outcome data             | 15* | Report numbers of outcome events or summary measures over time                                                                                                                                               | Tables     |
| Main results             | 16  | (a) Give unadjusted estimates and, if applicable, confounder-adjusted estimates and their precision (eg, 95% confidence interval). Make clear which confounders were adjusted for and why they were included | Tables     |
|                          |     | (b) Report category boundaries when continuous variables were categorized                                                                                                                                    | Tables     |
|                          |     | (c) If relevant, consider translating estimates of relative risk into absolute risk for a meaningful time period                                                                                             | NA         |
| Other analyses           | 17  | Report other analyses done—eg analyses of subgroups and interactions, and sensitivity analyses                                                                                                               | 10-13      |
| <b>Discussion</b>        |     |                                                                                                                                                                                                              |            |
| Key results              | 18  | Summarise key results with reference to study objectives                                                                                                                                                     | 13         |
| <b>Limitations</b>       |     |                                                                                                                                                                                                              |            |
| Interpretation           | 20  | Give a cautious overall interpretation of results considering objectives, limitations, multiplicity of analyses, results from similar studies, and other relevant evidence                                   | 14-19      |
| Generalisability         | 21  | Discuss the generalisability (external validity) of the study results                                                                                                                                        | 18-19      |
| <b>Other information</b> |     |                                                                                                                                                                                                              |            |
| Funding                  | 22  | Give the source of funding and the role of the funders for the present study and, if applicable, for the original study on which the present article is based                                                | 20         |

\*Give information separately for cases and controls in case-control studies and, if applicable, for exposed and unexposed groups in cohort and cross-sectional studies.

**Note:** An Explanation and Elaboration article discusses each checklist item and gives methodological background and published examples of transparent reporting. The STROBE checklist is best used in conjunction with this article (freely available on the Web sites of PLoS Medicine at <http://www.plosmedicine.org/>, Annals of Internal Medicine at <http://www.annals.org/>, and Epidemiology at <http://www.epidem.com/>). Information on the STROBE Initiative is available at [www.strobe-statement.org](http://www.strobe-statement.org).

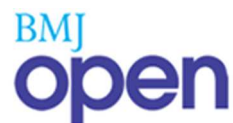

## Vitamin D Status and TB Treatment Outcomes in Adult Tanzanian Patients

|                                 |                                                                                                                                                                                                                                                                                                                                                                                  |
|---------------------------------|----------------------------------------------------------------------------------------------------------------------------------------------------------------------------------------------------------------------------------------------------------------------------------------------------------------------------------------------------------------------------------|
| Journal:                        | <i>BMJ Open</i>                                                                                                                                                                                                                                                                                                                                                                  |
| Manuscript ID:                  | bmjopen-2013-003703.R1                                                                                                                                                                                                                                                                                                                                                           |
| Article Type:                   | Research                                                                                                                                                                                                                                                                                                                                                                         |
| Date Submitted by the Author:   | 29-Sep-2013                                                                                                                                                                                                                                                                                                                                                                      |
| Complete List of Authors:       | Mehta, Saurabh; Cornell University ,<br>Mugusi, Ferdinand; Muhimbili University of Health and Allied Sciences,<br>Bosch, Ronald; Harvard University,<br>Aboud, Said; Muhimbili University of Health and Allied Sciences,<br>Urassa, Willy; World Health Organization,<br>Villamor, Eduardo; University of Michigan Ann Arbor,<br>Fawzi, Wafaie; Harvard School of Public Health, |
| <b>Primary Subject Heading</b>: | Global health                                                                                                                                                                                                                                                                                                                                                                    |
| Secondary Subject Heading:      | Infectious diseases, HIV/AIDS, Nutrition and metabolism, Epidemiology, Respiratory medicine                                                                                                                                                                                                                                                                                      |
| Keywords:                       | Tuberculosis < INFECTIOUS DISEASES, HIV , Africa , Vitamin D                                                                                                                                                                                                                                                                                                                     |
|                                 |                                                                                                                                                                                                                                                                                                                                                                                  |

SCHOLARONE™  
Manuscripts

## Vitamin D Status and TB Treatment Outcomes in Adult Tanzanian Patients

Saurabh Mehta<sup>1</sup>, Ferdinand M. Mugusi<sup>2</sup>, Ronald J. Bosch<sup>3</sup>, Said Aboud<sup>4</sup>, Willy Urassa<sup>5</sup>,  
Eduardo Villamor<sup>6</sup>, Wafaie W. Fawzi<sup>7</sup>

Corresponding Author: Saurabh Mehta, M.B.B.S., Sc.D.

Division of Nutritional Sciences, Cornell University

314 Savage Hall, Ithaca NY 14853

Phone: +1-607-255-2640; Fax: +1-607-255-1033; E-mail: [smehta@cornell.edu](mailto:smehta@cornell.edu)

Word Count: 3743 words

Number of figures: 2

Number of tables: 5

Online Supplementary Information: 2 tables

Running Title: Vitamin D and Tuberculosis

Keywords: Vitamin D, Tuberculosis, HIV, Africa

---

<sup>1</sup> Division of Nutritional Sciences, Cornell University, Ithaca NY 14853

<sup>2</sup> Department of Internal Medicine, Muhimbili University of Health and Allied Sciences, Dar es Salaam, Tanzania

<sup>3</sup> Department of Biostatistics, Harvard School of Public Health, Boston MA 02115

<sup>4</sup> Department of Microbiology and Immunology, Muhimbili University of Health and Allied Sciences, Dar es Salaam, Tanzania

<sup>5</sup> Diagnostics and Laboratory Technology Team, World Health Organization, Geneva, Switzerland

<sup>6</sup> Department of Epidemiology, University of Michigan School of Public Health, Ann Arbor MI 48109

<sup>7</sup> Departments of Global Health and Population, Nutrition, and Epidemiology, Harvard School of Public Health, Boston MA 02115



1  
2  
3 1 *Abstract*  
4

5 2 **Objectives:** Vitamin D is an immunomodulator and can alter response to tuberculosis  
6  
7  
8 3 treatment, though randomized trials have been inconclusive to date. We present the first  
9  
10 4 comprehensive analysis of the associations between vitamin D status and TB treatment,  
11  
12  
13 5 T-cell counts, and nutritional outcomes by HIV status.  
14

15  
16  
17 7 **Design:** Cohort study  
18  
19

20 8  
21  
22 9 **Setting:** Outpatient clinics in Tanzania  
23  
24

25 10  
26  
27 11 **Participants:** 25-hydroxyvitamin D levels were assessed in a cohort of 677 patients with  
28  
29 12 TB (344 HIV-infected) initiating anti-TB treatment at enrollment in a multivitamin  
30  
31 13 supplementation (excluding vitamin D) trial (Clinicaltrials.gov identifier:  
32  
33 14 NCT00197704).  
34  
35

36 15  
37  
38 16 **Primary and secondary outcome measures:** Information on treatment outcomes such as  
39  
40 17 failure and relapse, HIV disease progression, T-cell counts, and anthropometry was  
41  
42 18 collected routinely, with a median follow-up of 52 and 30 months for HIV-uninfected and  
43  
44 19 HIV-infected patients, respectively. Cox and binomial regression, and generalized  
45  
46 20 estimating equations were used to assess the association of vitamin D status with these  
47  
48 21 outcomes.  
49  
50

51  
52  
53 22  
54  
55  
56  
57  
58  
59  
60

1  
2  
3  
4 23 **Results:** Mean 25-hydroxyvitamin D concentrations at enrollment were 69.8 ( $\pm$ 21.5)  
5  
6 24 nmol/L [27.9 ( $\pm$ 8.6) ng/mL]. Vitamin D insufficiency (<75 nmol/L) was associated with  
7  
8 25 a 66% higher risk of relapse (95% CI: 4%, 164%; 133% higher risk in HIV-uninfected  
9  
10 26 patients). Each unit higher vitamin D levels at baseline were associated with a decrease of  
11  
12 27 3 ( $p=0.004$ ) CD8 and 3 ( $p=0.01$ ) CD3 T-cells/ $\mu$ L during follow-up in HIV-infected  
13  
14 28 patients. Vitamin D insufficiency was also associated with a greater decrease of BMI (-  
15  
16 29 0.21 kg/m<sup>2</sup>; 95% CI:-0.39, -0.02), during the first eight months of follow-up. No  
17  
18 30 association was observed for vitamin D status with mortality or HIV disease progression.  
19  
20 31

21  
22  
23  
24 32 **Conclusions:** Adequate vitamin D status is associated with a lower risk of relapse and  
25  
26 33 with improved nutritional indicators such as BMI in TB patients, with or without HIV  
27  
28 34 infection. Further research is needed to determine the optimal dose of vitamin D and  
29  
30 35 effectiveness of daily vitamin D supplementation among patients with TB.  
31  
32  
33  
34  
35  
36  
37

1  
2  
3 38 **Article Focus:** Recent laboratory data has suggested that optimal vitamin D status may  
4  
5 39 be associated with a more effective immune response to TB infection, a faster rate of  
6  
7 40 bacteriologic cure, and better long-term outcomes. However, clinical and epidemiological  
8  
9 41 studies have found inconsistent results. In this paper, we present the first comprehensive  
10  
11 42 analysis of the associations between vitamin D status and TB treatment, T-cell counts,  
12  
13 43 and nutritional outcomes by HIV status.  
14  
15  
16  
17  
18  
19

20 45 **Key Messages:** We found that patients with adequate vitamin D status were less likely to  
21  
22 46 experience a relapse during follow-up after completing TB treatment. They were also  
23  
24 47 more likely to have a better nutritional status, as assessed by their body mass index,  
25  
26 48 during follow-up, compared to patients with vitamin D insufficiency. The results provide  
27  
28 49 justification for conducting both a dose response study to determine optimal dose of  
29  
30 50 vitamin D and a randomized controlled trial of daily vitamin D supplementation among  
31  
32 51 patients with TB.  
33  
34  
35  
36  
37  
38

39 53 **Strengths and Limitations of this study:** The major strengths of this study include a  
40  
41 54 large number of participants, more than half of whom were HIV-infected, comprehensive  
42  
43 55 assessment of clinical, immunological, socio-demographic, and nutritional parameters,  
44  
45 56 and a long duration of follow-up. On the other hand, the major limitation is the possibility  
46  
47 57 of reverse causation and residual confounding. We have attempted to minimize this  
48  
49 58 through rigorous analyses and adjusting for several potential confounders, including  
50  
51 59 hemoglobin concentrations, HIV status, viral load, CD4 T-cells, and Karnofsky score, in  
52  
53 60 most analyses.  
54  
55  
56  
57  
58  
59  
60

1  
2  
3 61 **Introduction**  
4

5 62 *Mycobacterium tuberculosis* is one of the most pernicious infectious diseases and  
6  
7  
8 63 successful pathogens known to man. More than 95% of the estimated cases and deaths  
9  
10 64 due to tuberculosis (TB) occur in low-income countries. The United Republic of  
11  
12 65 Tanzania is one of the 22 high-burden countries that account for 80% of global TB cases.  
13  
14 66 Tanzania has an incidence of 177 cases per 100,000 population per year and a prevalence  
15  
16 67 of 183 cases per 100,000 population per year [1].  
17  
18  
19

20 68  
21  
22 69 The spread of Human Immunodeficiency Virus (HIV) has fuelled the resurgence of the  
23  
24 70 TB epidemic in Tanzania, as in other parts of sub-Saharan Africa [2]. HIV is the  
25  
26 71 strongest factor in the development of active TB; it is estimated that only one out of ten  
27  
28 72 immunocompetent persons infected with TB develops active TB in his/her lifetime;  
29  
30 73 whereas, one out of ten HIV-infected persons infected with TB will develop active TB  
31  
32 74 every year. An estimated 38% of TB patients in Tanzania are also infected with HIV [1].  
33  
34  
35

36 75  
37  
38 76 Current treatment regimens, given under appropriate management conditions, are nearly  
39  
40 77 100% curative for patients with drug-susceptible organisms. However, in Tanzania,  
41  
42 78 treatment fails in 12-17% of the cases. Additionally, TB patients in settings such as  
43  
44 79 Tanzania grapple with multiple health-related and quality of life issues, which are not  
45  
46 80 addressed adequately with treatment alone.  
47  
48  
49

50 81  
51  
52 82 Recent data has suggested that optimal vitamin D status may be associated with a more  
53  
54 83 effective immune response to TB infection, a faster rate of bacteriologic cure, and better  
55  
56  
57  
58  
59  
60

1  
2  
3 84 long-term outcomes. For example, a recent cross-sectional study found that vitamin D  
4  
5 85 deficiency is highly prevalent in South Africa and is associated with susceptibility to  
6  
7  
8 86 active TB both in the presence and absence of HIV infection [3]. A few randomized trials  
9  
10  
11 87 have also been conducted; two of the recent ones failed to find an effect of vitamin D  
12  
13 88 supplementation on treatment success [4 5]. However, the dose used and duration of  
14  
15 89 supplementation may have precluded finding an effect. Further, most studies had small  
16  
17 90 sample sizes and assessed only a limited number of covariates.  
18  
19

20 91  
21  
22 92 In this manuscript, we comprehensively examined the hypotheses that vitamin D status  
23  
24 93 may be associated with response to treatment, risk of treatment failure, laboratory  
25  
26 94 parameters such as T-cell counts, and anthropometric measurements in the context of a  
27  
28 95 randomized trial of micronutrient supplementation (supplement did not contain vitamin  
29  
30 96 D) in Tanzania to better inform future studies or trials.  
31  
32  
33

34 97

### 35 98 ***Materials and Methods***

36  
37 99 Study Population: The study population and recruitment methods have been described in  
38  
39 100 detail earlier [6]. Briefly, 887 adults with pulmonary tuberculosis (PTB) were enrolled in  
40  
41 101 a randomized trial (Clinicaltrials.gov identifier: NCT00197704) to examine the effects of  
42  
43 102 micronutrient supplementation on TB treatment failure, relapse, and mortality. The trial  
44  
45 103 started in April 2000 in Dar es Salaam, Tanzania and continued until April 2005. The  
46  
47 104 eligibility criteria for the study included positive sputum smears for acid-fast bacilli  
48  
49 105 (AFB), age between 18 and 65 years, Karnofsky performance score of  $\geq 40\%$  [7], plan to  
50  
51 106 stay in Dar es Salaam for 2 years, not being pregnant, and not having received anti-TB  
52  
53  
54  
55  
56  
57  
58  
59  
60

1  
2  
3 107 treatment during the previous one year. Consenting subjects were randomly assigned in  
4  
5 108 computer-generated permuted blocks of 20, stratified by HIV status, to receive a daily  
6  
7  
8 109 oral dose of 1 of 2 regimens: micronutrients (5000 IU of retinol, 20 mg of vitamin B1,  
9  
10 110 20mg of vitamin B2, 25mg of vitamin B<sub>6</sub>, 100 mg of niacin, 50 µg of vitamin B<sub>12</sub>, 500  
11  
12 111 mg of vitamin C, 200 mg of vitamin E, 0.8 mg of folic acid, and 100 µg of selenium) or  
13  
14 112 placebo. These doses represent between 6 and 10 times the recommended dietary  
15  
16 113 allowance (RDA) and were being tested at the time among HIV-infected adults from this  
17  
18 114 setting [8]. We chose multiples of the RDA because previous observational studies  
19  
20 115 suggested that HIV-infected individuals need higher dietary intakes of micronutrients to  
21  
22 116 achieve normal serum concentrations [9]. All patients received a daily combination of  
23  
24 117 rifampicin, isoniazid, pyrazinamide, and ethambutol under direct observation of a health  
25  
26 118 worker during the first 2 months (intensive phase) followed by 6 months of self-  
27  
28 119 administered daily isoniazid and ethambutol, as per the Tanzania National TB and  
29  
30 120 Leprosy Programme guidelines. None of the HIV-infected patients received antiretroviral  
31  
32 121 therapy, as these medications were not routinely available in Tanzania at the time this  
33  
34 122 trial was conducted.  
35  
36  
37  
38  
39  
40  
41  
42

43 124 At the time of randomization, research nurses collected information on various socio-  
44  
45 125 demographic characteristics including age, education levels, marital status, and  
46  
47 126 socioeconomic status. Anthropometric measurements were also obtained using  
48  
49 127 standardized procedures [10] at the randomization visit as well as during each monthly  
50  
51 128 follow-up visit. Height was measured to the nearest 0.1 cm using SECA Bodymeter 206  
52  
53 129 stadiometers, weight to the nearest 100 g with SECA 700 balance beam scales, and left  
54  
55  
56  
57  
58  
59  
60

1  
2  
3 130 mid-upper arm circumference (MUAC) at the midpoint between the acromion and  
4  
5 131 olecranon to the nearest 0.1 cm using non-stretchable tailor's tapes.  
6  
7  
8 132  
9  
10 133 Physician visits were scheduled every 3 months. During these visits, study physicians  
11  
12 134 inquired about the health of the subject during the preceding period and performed a  
13  
14 135 complete physical examination. The stage of HIV disease was assessed according to the  
15  
16 136 World Health Organization system [11].  
17  
18  
19  
20 137  
21  
22 138 Ethics Approval: A written informed consent was obtained from all the study  
23  
24 139 participants. The institutional review boards of the Muhimbili University of Health and  
25  
26 140 Allied Sciences, the Tanzanian National AIDS Control Program, and the Harvard School  
27  
28 141 of Public Health approved the study protocol.  
29  
30  
31  
32 142  
33  
34 143 Laboratory Methods: At the time of initiation of anti-TB treatment, HIV status was  
35  
36 144 assessed among consenting patients using 2 sequential ELISAs (Wellcozyme, Murex  
37  
38 145 Biotech; Enzygnost anti-HIV1/2 Plus, Dade Behring); discrepant results were resolved by  
39  
40 146 Western Blot test (Bio-rad, Genetic Systems). Both pre-test and post-test counseling was  
41  
42 147 provided. A blood sample also was obtained for measurement of hemoglobin and  
43  
44 148 albumin concentrations using AcT Diff II hematology analyzer (Beckman Coulter,  
45  
46 149 Miami) and Hitachi 911 analyzer (Roche Diagnostics), respectively. CD4, CD3, and CD8  
47  
48 150 T-cell counts were determined using FACScout or FACSCan systems (Becton  
49  
50 151 Dickinson, CA, USA). Viral load was also determined using the Amplicor HIV-1  
51  
52 152 monitor v1.5 assay (Roche Molecular Systems, Branchburg, NJ, USA).  
53  
54  
55  
56  
57  
58  
59  
60

1  
2  
3 153  
4

5 154 Assessment of Vitamin D Status: Serum 25-hydroxyvitamin D concentrations were  
6  
7  
8 155 measured using liquid chromatography-mass spectrometry at the Children's Hospital in  
9  
10 156 Boston only at enrollment before the initiation of micronutrient supplementation. We  
11  
12 157 defined vitamin D insufficiency status as serum 25(OH)D levels of less than 75 nmol/L  
13  
14 158 and adequate otherwise. Vitamin D deficiency was defined as serum 25(OH)D levels of  
15  
16 159 less than 50 nmol/L.  
17

18  
19  
20 160

21  
22 161 Statistical Analysis: We examined the association of vitamin D status with TB treatment  
23  
24 162 outcomes as well as nutritional, immunological, and clinical end points in the entire  
25  
26 163 cohort and separately by HIV status at baseline. TB-related end points included treatment  
27  
28 164 failure, early relapse, and late relapse. Treatment failure by 1 month was defined as  
29  
30 165 positive AFB cultures at 1 month from the initiation of treatment. Relapses were deemed  
31  
32 166 to have occurred in patients with positive cultures, among those who had become culture  
33  
34 167 negative after treatment initiation. Relapses/recurrences included both endogenous  
35  
36 168 reactivation and exogenous reinfection, which could not be distinguished in this study.  
37  
38 169 We calculated the relative risks (RRs) and 95% confidence intervals (CIs) for each of  
39  
40 170 these outcomes by vitamin D status using binomial regression. We used Cox proportional  
41  
42 171 hazards models to assess the association of vitamin D status with mortality in all patients  
43  
44 172 and HIV disease progression from stage 3 to 4 in HIV-infected participants. We defined  
45  
46 173 the end of follow-up as the date when HIV stage was last assessed.  
47  
48  
49  
50

51  
52 174  
53  
54  
55  
56  
57  
58  
59  
60



1  
2  
3 175 We examined the association of vitamin D status with CD4, CD8, and CD3 T-cell counts,  
4  
5 176 viral load (in HIV-infected participants), indicators of nutritional status (body mass index  
6  
7  
8 177 [BMI] and albumin concentrations), and hemoglobin concentrations using generalized  
9  
10 178 estimating equations (GEEs). These models do not require that all patients have the same  
11  
12 179 number of follow-up assessments or that the follow-up measurements be obtained at  
13  
14 180 exactly the same time points. We assumed a standard normal distribution for repeated  
15  
16 181 continuous end points (T cell subsets, log<sub>10</sub> viral load, anthropometry, and albumin and  
17  
18 182 hemoglobin concentrations) and estimated average differences during follow-up by  
19  
20 183 vitamin D status. We used an exchangeable correlation structure to account for within-  
21  
22 184 subject correlations and adjusted the models for the follow-up time when the  
23  
24 185 measurements had been obtained and for the baseline values.  
25  
26  
27  
28  
29  
30  
31

32 187 We analyzed the data for the entire period and for the first 8 months, coinciding with the  
33  
34 188 expected end of TB treatment. Multivariate analyses adjusted for age, Karnofsky score,  
35  
36 189 baseline hemoglobin concentrations, viral load, HIV status, CD4 T-cell counts, and  
37  
38 190 micronutrient supplementation, unless otherwise specified in the results section or the  
39  
40 191 tables. All analyses were performed using SAS software version 9.3 (SAS Institute Inc.,  
41  
42 192 Cary NC).  
43  
44  
45  
46  
47

## 48 194 **Results**

49  
50 195 Baseline 25-hydroxyvitamin D concentrations were available for 677 patients out of the  
51  
52 196 original cohort of 887. Mean 25-hydroxyvitamin D concentration was 69.8 (±21.5)  
53  
54 197 nmol/L [27.9 (±8.6) ng/mL] and its distribution is shown in Figure 1. The baseline  
55  
56  
57  
58  
59  
60

1  
2  
3 198 characteristics of these 677 patients by HIV status are presented in Table 1. 36% of the  
4  
5 199 HIV-infected patients had CD4 T-cell counts below 200 cells/ $\mu$ L. The mean body mass  
6  
7 200 index (BMI) was  $19.1 \pm 2.7$  kg/m<sup>2</sup>. The median follow-up time for HIV-uninfected  
8  
9 201 patients was 52 months (inter-quartile range [IQR]: 47-57 months) and for HIV-infected  
10  
11 202 patients was 30 months (IQR: 15-41 months).  
12  
13  
14  
15  
16  
17

18 204 The mean 25-hydroxyvitamin D concentrations were significantly different across season  
19  
20 205 of blood draw in this cohort (p=0.004). Tanzania has four seasons: dry (January-  
21  
22 206 February); long rains (March-June); dry (July-October); short rains (November-  
23  
24 207 December). The boxplot of vitamin D's association with season of blood draw is  
25  
26 208 presented in Figure 2. In subgroup analyses, this association was only observed among  
27  
28 209 the HIV-uninfected patients and not the HIV-infected patients.  
29  
30  
31  
32  
33

34 211 We examined the correlates of vitamin D insufficiency, defined as serum 25(OH)D  
35  
36 212 concentrations below 75 nmol/L (75 nmol/L) in Supplemental Tables 1 (HIV-uninfected)  
37  
38 213 and 2 (HIV-infected). All factors that had univariate associations with p<0.20 were  
39  
40 214 included in a multivariate model; only the factors that had p<0.05 were retained in the  
41  
42 215 final model. Among the HIV-uninfected subset, patients enrolled in the dry winter season  
43  
44 216 between July and October were 50% more likely to have vitamin D insufficiency,  
45  
46 217 compared to patients enrolled in the dry summer season between January and February (p  
47  
48 218 for season=0.002). Similarly, the participants with the lowest height were more likely to  
49  
50 219 have vitamin D insufficiency (p=0.01). Finally, greater expenditure on food per person  
51  
52 220 per day was associated with a lower risk of having inadequate vitamin D status (Risk  
53  
54  
55  
56  
57  
58  
59  
60

1  
2  
3 221 Ratio [RR] per 1000 Tanzanian Shillings [approximately 1 US Dollar at the time of the  
4  
5 222 study]: 0.76; 95% Confidence Interval [CI]: 0.59, 0.98). In the HIV-infected subset,  
6  
7 223 patients with higher hemoglobin concentrations at baseline were less likely to have  
8  
9 224 vitamin D insufficiency, with a 7% lower risk per 1 g/dL higher hemoglobin level  
10  
11 225 ( $p=0.007$ ). On the other hand, higher number of CD4 T-cells was associated with a higher  
12  
13 226 risk of having inadequate vitamin D status (4% higher risk per 100 CD4 T-cells/ $\mu\text{L}$ ;  
14  
15 227  $p=0.02$ ).

16  
17  
18  
19 228  
20  
21 229 There was no significant association of vitamin D status at TB treatment initiation with  
22  
23 230 mortality or HIV disease progression in this cohort (Table 2 includes only HIV-infected  
24  
25 231 participants as there were only 13 deaths in the HIV-uninfected subset). There was no  
26  
27 232 association observed between vitamin D status and treatment failure one month after  
28  
29 233 initiation of TB treatment (Table 3). However, patients with vitamin D insufficiency ( $<75$   
30  
31 234 nmol/L) had a 66% higher risk of relapse after becoming culture-negative at one month  
32  
33 235 after initiation of TB treatment (95% CI: 4%, 164%). This association was more  
34  
35 236 pronounced in those who were not HIV-infected at enrollment in the study (RR: 2.33;  
36  
37 237 95% CI: 1.26, 4.29). In analysis with continuous vitamin D levels, each nmol/L increase  
38  
39 238 was associated with a 1% lower risk of relapse during follow-up ( $p=0.04$ ).

40  
41 239  
42  
43 240 Vitamin D insufficiency was observed to have no association with CD4 T-cell counts  
44  
45 241 during the entire follow-up in either the HIV-infected or the HIV-uninfected subsets  
46  
47 242 (Table 4). However, vitamin D insufficiency was associated with greater CD4 T-cell  
48  
49  
50  
51  
52  
53  
54  
55  
56  
57  
58  
59  
60

1  
2  
3 243 counts during the first eight months of follow-up in the HIV-infected patients (mean  
4  
5 244 difference: 58; 95% CI: 13, 104).  
6  
7

8 245

9  
10 246 In analysis among HIV-infected patients with continuous vitamin D levels, each nmol/L  
11  
12 247 higher vitamin D concentration was associated with a decrease of 3 CD8 and 3 CD3 T-  
13  
14 248 cells per  $\mu\text{L}$ . Vitamin D insufficiency was associated with an average of 85 higher CD8  
15  
16 249 T-cells/ $\mu\text{L}$  during follow-up (95% CI: 4, 165). Similar results were observed when we  
17  
18 250 restricted the analyses to the first eight months of follow-up, the duration of TB treatment  
19  
20 251 at the time of the study in Tanzania. No relationship was observed with mean viral loads  
21  
22 252 during follow-up in the patients who were HIV-infected at the time of enrollment.  
23  
24  
25  
26

27 253

28  
29 254 In analysis examining association of vitamin D status with nutritional parameters in the  
30  
31 255 entire period of follow-up, no significant relationship was observed with BMI, albumin,  
32  
33 256 or hemoglobin concentrations (Table 5). During the first eight months of follow-up,  
34  
35 257 patients with Vitamin D Insufficiency experienced a decline in BMI (Mean:  $-0.21 \text{ kg/m}^2$ ;  
36  
37 258 95% CI:  $-0.39, -0.02$ ), compared to patients with adequate vitamin D status. These results  
38  
39 259 were more pronounced in HIV-uninfected patients (Mean:  $-0.34$ ; 95% CI:  $-0.60, -0.09$ )  
40  
41 260 and not significant in HIV-infected patients. HIV-infected patients with vitamin D  
42  
43 261 insufficiency had increased albumin levels (Mean:  $0.94$ ; 95% CI:  $0.55, 1.32$ ) during the  
44  
45 262 first eight months of follow-up compared to patients with adequate vitamin D status.  
46  
47  
48  
49

50 263

51  
52  
53 264 ***Discussion***  
54  
55  
56  
57  
58  
59  
60

1  
2  
3 265 In this study among 677 patients with tuberculosis in Tanzania, more than 61% of the  
4  
5 266 participants had 25-hydroxyvitamin D concentrations below 75 nmol/L (75 nmol/L). 25-  
6  
7  
8 267 hydroxyvitamin D concentrations were associated with the season of blood draw, money  
9  
10 268 spent on food per person per day, and height in HIV-uninfected participants and  
11  
12 269 hemoglobin concentrations and CD4 T-cell counts among HIV-infected patients. Vitamin  
13  
14 270 D insufficiency (<75 nmol/L) was not associated with mortality, HIV disease  
15  
16  
17 271 progression, or treatment failure during follow-up in the entire cohort. However, patients  
18  
19 272 with vitamin D insufficiency had an increased risk of experiencing TB relapse during  
20  
21 273 follow-up. Further, vitamin D insufficiency was associated with a decline in CD8 and  
22  
23 274 CD3 T-cells in both the first eight months (the duration of TB treatment) and the entire  
24  
25 275 period of follow-up. A similar relationship was observed with BMI in the first eight  
26  
27 276 months of follow-up.  
28  
29  
30  
31

32 277  
33  
34 278 Our study was conducted in Dar es Salaam, the largest urban center in Tanzania, and just  
35  
36 279 six degrees south of the Equator. The prevalence of vitamin D insufficiency (>61%) in  
37  
38 280 this study is higher than the approximately 40% found in a previous study among TB  
39  
40 281 patients in Mwanza, Tanzania [12] and in our studies among HIV-infected pregnant  
41  
42 282 women (~85% of them had stage 1 HIV disease, unlike this study) in Dar es Salaam [13  
43  
44 283 14]. However, this prevalence is lower than what was observed in a cross-sectional study  
45  
46 284 in South Africa, where 88% of HIV-uninfected and 97% of HIV-infected TB patients had  
47  
48 285 vitamin D insufficiency. The mean vitamin D concentration in this study was 69.8  
49  
50 286 nmol/L, compared to 86.5 nmol/L in the study in Mwanza and 28.8-40 nmol/L in the  
51  
52 287 South African study. One study from Thailand observed similar levels (69.0 nmol/L) in  
53  
54  
55  
56  
57  
58  
59  
60

1  
2  
3 288 TB patients [15]; Thailand is located at a similar distance from the Equator as Tanzania,  
4  
5 289 though it is in the northern hemisphere. Similar to the study in South Africa, the vitamin  
6  
7  
8 290 D levels were lowest in our study in the dry winter season between July and October,  
9  
10 291 though the differences were not as stark. For example, the mean vitamin D concentration  
11  
12 292 in January to March in the South African study was 56.8 nmol/L and 30.8 nmol/L  
13  
14 293 between July and September, whereas in our study, the concentrations were 74.8 nmol/L  
15  
16 294 for January through February, and 66.3 nmol/L for July through October.  
17  
18  
19  
20  
21

22 296 Vitamin D is synthesized in the skin through the action of ultraviolet light on 7-  
23  
24 297 dehydrocholesterol. Fatty fish, such as salmon and sardines, are good sources of vitamin  
25  
26  
27 298 D in the diet but are not widely available everywhere and are usually expensive.  
28  
29 299 Increasing urbanization and a tendency to spend most time indoors are major factors that  
30  
31 300 contribute to the inability of the skin to synthesize adequate amounts of vitamin D [16-  
32  
33 301 18]. Additionally, the TB disease itself and/or the HIV co-infection in the participants in  
34  
35 302 this study are probably the primary reasons for restricted physical activity, lack of  
36  
37 303 adequate exposure to sunlight, and consequent low concentrations of vitamin D.  
38  
39  
40  
41  
42

43 305 Several other investigators have examined correlates of vitamin D status in TB patients.  
44  
45 306 The study in Mwanza found that marital status, BMI, and serum transferrin receptor  
46  
47 307 concentrations were correlated with vitamin D status. Though the first two were  
48  
49 308 correlated with vitamin D status in our study in univariate analyses, neither remained  
50  
51 309 significant in multivariate analyses. We didn't measure serum transferrin receptor in our  
52  
53 310 study, though we did observe a correlation of vitamin D status with hemoglobin  
54  
55  
56  
57  
58  
59  
60

1  
2  
3 311 concentrations among the HIV-infected subset. Another study in South Africa found that  
4  
5 312 TB status (active disease vs. latent infection), month of sampling, and BMI were  
6  
7 313 significantly correlated with vitamin D status in multivariate analyses [3]. All patients in  
8  
9 314 our study had active disease, and we didn't observe a relationship with BMI in our  
10  
11 315 analyses. The study in South Africa incorporated only those correlates associated with  
12  
13 316 serum 25(OH)D concentration with  $P < 0.05$  in univariate analysis in the multivariate  
14  
15 317 model. This may have precluded selection of important covariates and confounders, if  
16  
17 318 measured, and produced biased estimates and confidence intervals; increasing the  
18  
19 319 nominal significance level to 20% or more, as used in this study [19] can eliminate most  
20  
21 320 of this bias. Most other studies have been with smaller sample sizes and have examined a  
22  
23 321 limited set of covariates, compared to the current study.  
24  
25  
26  
27  
28  
29  
30  
31

32 322  
33 323 There was no association of vitamin D status with mortality or HIV disease progression  
34  
35 324 in this cohort, unlike our previous studies among HIV-infected pregnant women [13 20]  
36  
37 325 or HIV-infected adults [21 22] in Tanzania. The major difference is that in our earlier  
38  
39 326 studies [13 20], a large majority (~85%) of the participants had stage 1 or asymptomatic  
40  
41 327 HIV disease, whereas in this study, most of the individuals were already at stage 3  
42  
43 328 disease.  
44  
45  
46  
47  
48

49 330 The association of vitamin D insufficiency with TB recurrence/relapse, primarily driven  
50  
51 331 by the HIV-uninfected subset, is a novel finding in a longitudinal study and has important  
52  
53 332 implications. Vitamin D deficiency has been linked to TB in several studies – a  
54  
55 333 hypothesis perhaps initially generated by the observed seasonality of TB. *In vitro* and  
56  
57  
58  
59  
60

1  
2  
3 334 animal studies indicate that 1,25-dihydroxyvitamin D<sub>3</sub>, the most active form of vitamin  
4  
5 335 D, may increase mycobacterial killing by macrophages but also limits host damage by  
6  
7  
8 336 decreasing the gamma-interferon production [23-28]. In perhaps the strongest evidence to  
9  
10 337 date for a role of vitamin D in tuberculosis, a study by Liu *et al* [29] found that the  
11  
12 338 antimycobacterial response in humans is dependent on adequate availability of vitamin D.

13  
14  
15  
16 339

17  
18  
19 340 A few randomized trials of vitamin D supplementation in TB patients have been  
20  
21 341 conducted in the past few years [4 5 30]. In a randomized trial that was conducted among  
22  
23 342 365 TB patients in Guinea-Bissau starting antituberculosis treatment, overall mortality  
24  
25 343 was 15% (54 of 365) at 1 year of follow-up and similar in both arms [5]. Martineau and  
26  
27 344 colleagues didn't find a difference in median time to sputum culture conversion with  
28  
29 345 vitamin D supplementation of 2.5 mg vitamin D<sub>3</sub> at enrollment, 14, 28, and 42 days after  
30  
31 346 starting TB treatment in 126 adults with sputum smear-positive PTB [4]. A recent report  
32  
33 347 by Coussens *et al* from a subset of the 126 adults included in the trial above stated that  
34  
35 348 median time to sputum smear conversion in the intervention arm was significantly shorter  
36  
37 349 than in the control arm (23 vs. 36 days; p=0.04) [30]. The lack of effect and concordance  
38  
39 350 in most of these trials is probably due to the dose and dosing interval used. It is worth  
40  
41 351 noting however, that large intermittent doses of vitamin D may result in  
42  
43 352 supraphysiological concentrations in some cases, which may be more harmful than  
44  
45 353 helpful in their effects on the immune system [31].  
46  
47  
48  
49  
50  
51  
52  
53  
54  
55  
56  
57  
58  
59  
60



1  
2  
3 355 Vitamin D insufficiency also was associated with T-cell subset counts only among the  
4  
5  
6 356 HIV-infected patients in this cohort. We can only speculate as to the reasons for the  
7  
8 357 significantly higher increase in CD4 T-cells observed in patients with vitamin D  
9  
10 358 insufficiency at baseline. One potential explanation is that HIV-infected patients with  
11  
12 359 vitamin D insufficiency may experience more uncontrolled immune reconstitution,  
13  
14 360 leading to a greater increase in CD4 T-cell counts, on treatment of TB, compared to  
15  
16 361 patients with adequate vitamin D status. This may also explain why this relationship is  
17  
18 362 observed only in the first eight months of follow-up and not subsequently.  
19  
20  
21  
22  
23  
24  
25  
26  
27  
28  
29  
30  
31  
32  
33  
34  
35  
36  
37  
38  
39  
40  
41  
42  
43  
44  
45  
46  
47  
48  
49  
50  
51  
52  
53  
54  
55  
56  
57  
58  
59  
60

363  
364 The results for CD8 and CD3 T-cells are consistent with our previous studies among  
365 HIV-infected women in Tanzania [13 14]. This could suggest a possible role of vitamin  
366 D in inflammation. Although, the conventional role of CD8 cells is as cytotoxic cells,  
367 they also are effector cells in inflammation [32]. The involvement of vitamin D in  
368 modulating CD8 cells is also indicated by the fact that CD8 cells express the highest  
369 concentration of vitamin D receptor of the immune cells [33]. Other studies also have  
370 found that vitamin D suppresses antigen-stimulated proinflammatory cytokine responses,  
371 which may help speed up resolution of inflammatory responses that can lead to increased  
372 risk of mortality among TB patients [30].

373  
374 TB, once known as 'consumption', is associated with significant wasting and weight loss.  
375 The observation that better vitamin D status among HIV-uninfected patients is associated  
376 with a greater increase in BMI during follow-up is likely related to decreased risk of

1  
2  
3 377 relapse among these patients, as well as improvement in quality of life through  
4  
5 378 mechanisms such as better metabolism that were not directly assessed in this study.  
6  
7  
8 379 The major strengths of this study include a large number of participants, more than half  
9  
10 380 of whom were HIV-infected, comprehensive assessment of clinical, immunological,  
11  
12 381 socio-demographic, and nutritional parameters, and a long duration of follow-up. On the  
13  
14 382 other hand, the major limitation is the possibility of reverse causation and residual  
15  
16 383 confounding. We have attempted to minimize this through rigorous analyses and  
17  
18 384 adjusting for several potential confounders, including hemoglobin concentrations, HIV  
19  
20 385 status, viral load, CD4 T-cells, and Karnofsky score, in most analyses. The study results  
21  
22 386 are generalizable to most settings with a high TB burden and widely prevalent vitamin D  
23  
24 387 insufficiency.  
25  
26  
27  
28  
29  
30  
31

32 389 In summary, our study results indicate that adequate vitamin D status is associated with  
33  
34 390 better clinical and nutritional parameters during follow-up in a cohort of TB patients in  
35  
36 391 Tanzania. While randomized trials of vitamin D supplementation among TB patients are  
37  
38 392 urgently warranted, it is also imperative to conduct dose-response studies to determine  
39  
40 393 ideal dose and duration for the supplement.  
41  
42  
43  
44  
45  
46  
47  
48  
49  
50  
51  
52  
53  
54  
55  
56  
57  
58  
59  
60

1  
2  
3 397 ***Acknowledgments***  
4

5 398 We thank the patients, whose participation made this study possible. We are grateful to  
6  
7  
8 399 the study coordinator, Dorothy Mallya, and to the study physicians, research nurses, and  
9  
10 400 laboratory and administrative staff at Muhimbili University of Health and Allied Sciences  
11  
12 401 in Dar es Salaam, Tanzania, for their contributions to the project.  
13  
14

15 402

16  
17 403 ***Financial support***

18  
19  
20  
21 404 National Institute of Allergy and Infectious Diseases, National Institutes of Health (grant  
22  
23 405 U01AI045441 to support the study)  
24

25  
26 406

27  
28 407 The authors report NO conflict of interest  
29

30  
31 408

32  
33 409 ***Author Contributions***

34  
35 410 SM wrote the first draft of the manuscript and analyzed and interpreted the data; FMM,  
36  
37 411 RJB, SA, WU, EV, and WWF were investigators of the parent trial and contributed to  
38  
39 412 field activities and oversight; RJB also helped with the analysis and interpretation of the  
40  
41 413 data; all authors participated in study design and contributed to the final manuscript. All  
42  
43 414 authors have also read and approved the final manuscript.  
44  
45

46  
47 415 ***Data sharing***

48  
49 416 No additional data available on vitamin D and tuberculosis.  
50  
51  
52  
53  
54  
55  
56  
57  
58  
59  
60

## References

1. WHO. Global Tuberculosis Control. Geneva: World Health Organization, 2011.
2. Chaisson RE, Martinson NA. Tuberculosis in Africa--combating an HIV-driven crisis. *N Engl J Med* 2008;**358**(11):1089-92 doi: 358/11/1089 [pii] 10.1056/NEJMp0800809[published Online First: Epub Date]].
3. Martineau AR, Nhamoyebonde S, Oni T, et al. Reciprocal seasonal variation in vitamin D status and tuberculosis notifications in Cape Town, South Africa. *Proc Natl Acad Sci U S A* 2011;**108**(47):19013-7 doi: 10.1073/pnas.1111825108[published Online First: Epub Date]].
4. Martineau AR, Timms PM, Bothamley GH, et al. High-dose vitamin D(3) during intensive-phase antimicrobial treatment of pulmonary tuberculosis: a double-blind randomised controlled trial. *Lancet* 2011;**377**(9761):242-50 doi: 10.1016/S0140-6736(10)61889-2[published Online First: Epub Date]].
5. Wejse C, Gomes VF, Rabna P, et al. Vitamin D as supplementary treatment for tuberculosis: a double-blind, randomized, placebo-controlled trial. *American Journal of Respiratory and Critical Care Medicine* 2009;**179**(9):843-50 doi: 10.1164/rccm.200804-567OC[published Online First: Epub Date]].
6. Villamor E, Mugusi F, Urassa W, et al. A Trial of the Effect of Micronutrient Supplementation on Treatment Outcome, T Cell Counts, Morbidity, and Mortality in Adults with Pulmonary Tuberculosis. *J Infect Dis* 2008;**197**(11):1499-505 doi: 10.1086/587846 10.1086/587846 [pii][published Online First: Epub Date]].

- 1  
2  
3  
4  
5  
6  
7  
8  
9  
10  
11  
12  
13  
14  
15  
16  
17  
18  
19  
20  
21  
22  
23  
24  
25  
26  
27  
28  
29  
30  
31  
32  
33  
34  
35  
36  
37  
38  
39  
40  
41  
42  
43  
44  
45  
46  
47  
48  
49  
50  
51  
52  
53  
54  
55  
56  
57  
58  
59  
60
7. Karnofsky DA, Abelmann WH, Craver LF, et al. The use of nitrogen mustards in the palliative treatment of cancer. *Cancer* 1948;**1**:634-56
8. Fawzi WW, Msamanga GI, Spiegelman D, et al. A randomized trial of multivitamin supplements and HIV disease progression and mortality. *N Engl J Med* 2004;**351**(1):23-32
9. Baum M, Cassetti L, Bonvehi P, et al. Inadequate dietary intake and altered nutrition status in early HIV-1 infection. *Nutrition* 1994;**10**(1):16-20
10. Lohman TG, Roche AF, Martorell R. *Anthropometric standardization reference manual*. Champaign, IL: Human Kinetics Books, 1988.
11. WHO. Interim proposal for a WHO staging system for HIV infection and disease. *Wkly Epidemiol Rec* 1990;**65**:221-24
12. Friis H, Range N, Pedersen ML, et al. Hypovitaminosis D is common among pulmonary tuberculosis patients in Tanzania but is not explained by the acute phase response. *J Nutr* 2008;**138**(12):2474-80 doi: 10.1093/ajph/98.12.2474 [pii] 10.3945/jn.108.094979[published Online First: Epub Date].
13. Mehta S, Giovannucci E, Mugusi FM, et al. Vitamin D status of HIV-infected women and its association with HIV disease progression, anemia, and mortality. *PLoS ONE* 2010;**5**(1):e8770 doi: 10.1371/journal.pone.0008770[published Online First: Epub Date].
14. Mehta S, Spiegelman D, Aboud S, et al. Lipid-soluble vitamins A, D, and E in HIV-infected pregnant women in Tanzania. *European journal of clinical nutrition* 2010;**64**(8):808-17 doi: 10.1038/ejcn.2010.76[published Online First: Epub Date].
15. Davies PD, Church HA, Bovornkitti S, et al. Altered vitamin D homeostasis in tuberculosis. *Intern Med (Thailand)* 1988;**4**:45-47

- 1  
2  
3  
4  
5  
6  
7  
8  
9  
10  
11  
12  
13  
14  
15  
16  
17  
18  
19  
20  
21  
22  
23  
24  
25  
26  
27  
28  
29  
30  
31  
32  
33  
34  
35  
36  
37  
38  
39  
40  
41  
42  
43  
44  
45  
46  
47  
48  
49  
50  
51  
52  
53  
54  
55  
56  
57  
58  
59  
60
16. Norman AW. Nutritional Aspects of Vitamin D. <http://vitamind.ucr.edu/nutri.html>. Accessed Oct 9, 2006. 1999. <http://vitamind.ucr.edu/nutri.html> (accessed Oct 9, 2006).
17. Utiger RD. The need for more vitamin D. *N Engl J Med* 1998;**338**(12):828-9
18. Holick MF. High prevalence of vitamin D inadequacy and implications for health. *Mayo Clin Proc* 2006;**81**(3):353-73
19. Greenland S. Modeling and variable selection in epidemiologic analysis. *Am J Public Health* 1989;**79**(3):340-9
20. Mehta S, Mugusi FM, Spiegelman D, et al. Vitamin D status and its association with morbidity including wasting and opportunistic illnesses in HIV-infected women in Tanzania. *AIDS Patient Care STDS* 2011;**25**(10):579-85 doi: 10.1089/apc.2011.0182[published Online First: Epub Date].
21. Sudfeld CR, Giovannucci EL, Isanaka S, et al. Vitamin D Status and Incidence of Pulmonary Tuberculosis, Opportunistic Infections, and Wasting Among HIV-Infected Tanzanian Adults Initiating Antiretroviral Therapy. *The Journal of infectious diseases* 2013;**207**(3):378-85 doi: 10.1093/infdis/jis693[published Online First: Epub Date].
22. Sudfeld CR, Wang M, Aboud S, et al. Vitamin D and HIV progression among Tanzanian adults initiating antiretroviral therapy. *PloS one* 2012;**7**(6):e40036 doi: 10.1371/journal.pone.0040036[published Online First: Epub Date].
23. Thoma-Uszynski S, Stenger S, Takeuchi O, et al. Induction of direct antimicrobial activity through mammalian toll-like receptors. *Science* 2001;**291**(5508):1544-7
24. Waters WR, Palmer MV, Nonnecke BJ, et al. Mycobacterium bovis infection of vitamin D-deficient NOS2<sup>-/-</sup> mice. *Microb Pathog* 2004;**36**(1):11-7

- 1  
2  
3  
4  
5  
6  
7  
8  
9  
10  
11  
12  
13  
14  
15  
16  
17  
18  
19  
20  
21  
22  
23  
24  
25  
26  
27  
28  
29  
30  
31  
32  
33  
34  
35  
36  
37  
38  
39  
40  
41  
42  
43  
44  
45  
46  
47  
48  
49  
50  
51  
52  
53  
54  
55  
56  
57  
58  
59  
60
25. Waters WR, Nonnecke BJ, Foote MR, et al. Mycobacterium bovis bacille Calmette-Guerin vaccination of cattle: activation of bovine CD4+ and gamma delta TCR+ cells and modulation by 1,25-dihydroxyvitamin D3. *Tuberculosis (Edinb)* 2003;**83**(5):287-97
26. Waters WR, Nonnecke BJ, Rahner TE, et al. Modulation of Mycobacterium bovis-specific responses of bovine peripheral blood mononuclear cells by 1,25-dihydroxyvitamin D(3). *Clin Diagn Lab Immunol* 2001;**8**(6):1204-12
27. Kawakami K, Teruya K, Tohyama M, et al. [A therapeutic trial of experimental tuberculosis with gamma-interferon in an immunocompromised mouse model]. *Kekkaku* 1994;**69**(10):607-13
28. McMurray DN, Bartow RA, Mintzer CL, et al. Micronutrient status and immune function in tuberculosis. *Ann N Y Acad Sci* 1990;**587**:59-69
29. Liu PT, Stenger S, Li H, et al. Toll-Like Receptor Triggering of a Vitamin D-Mediated Human Antimicrobial Response. *Science* 2006:1123933 doi: 10.1126/science.1123933[published Online First: Epub Date].
30. Coussens AK, Wilkinson RJ, Hanifa Y, et al. Vitamin D accelerates resolution of inflammatory responses during tuberculosis treatment. *Proc Natl Acad Sci* 2012:Epub
31. Martineau AR. Bolus-dose vitamin D and prevention of childhood pneumonia. *Lancet* 2012;**379**(9824):1373-5 doi: 10.1016/S0140-6736(12)60405-X[published Online First: Epub Date].
32. Babbe H, Roers A, Waisman A, et al. Clonal expansions of CD8(+) T cells dominate the T cell infiltrate in active multiple sclerosis lesions as shown by micromanipulation and single cell polymerase chain reaction. *J Exp Med* 2000;**192**(3):393-404

1  
2  
3 33. Veldman CM, Cantorna MT, DeLuca HF. Expression of 1,25-dihydroxyvitamin D(3)  
4 receptor in the immune system. Arch Biochem Biophys 2000;374(2):334-8 doi:  
5  
6 10.1006/abbi.1999.1605  
7  
8 S0003-9861(99)91605-3 [pii][published Online First: Epub Date].  
9  
10  
11  
12  
13  
14  
15  
16  
17  
18  
19  
20  
21  
22  
23  
24  
25  
26  
27  
28  
29  
30  
31  
32  
33  
34  
35  
36  
37  
38  
39  
40  
41  
42  
43  
44  
45  
46  
47  
48  
49  
50  
51  
52  
53  
54  
55  
56  
57  
58  
59  
60

For peer review only



1  
2  
3  
4  
5  
6  
7  
8  
9  
10  
11  
12  
13  
14  
15  
16  
17  
18  
19  
20  
21  
22  
23  
24  
25  
26  
27  
28  
29  
30  
31  
32  
33  
34  
35  
36  
37  
38  
39  
40  
41  
42  
43  
44  
45  
46  
47  
48  
49  
50  
51  
52  
53  
54  
55  
56  
57  
58  
59  
60

*Figure Legends*

1. Distribution of 25-hydroxyvitamin D concentrations at baseline (nmol/L)
2. Distribution of 25-hydroxyvitamin D concentrations by season of blood draw;  
Season 1: Dry (January-February); Season 2: Long Rains (March-June); Season 3:  
Dry (July-October); Season 4: Short Rains (November-December)

For peer review only

*Tables*

| <b>Table 1</b>                                                     | <b>Baseline Characteristics of the Study Population (n=677)</b> |                                      |                                      |
|--------------------------------------------------------------------|-----------------------------------------------------------------|--------------------------------------|--------------------------------------|
|                                                                    |                                                                 | <b>HIV-infected<br/>(n=344)</b>      | <b>HIV-uninfected<br/>(n=333)</b>    |
| <b>Variable</b>                                                    |                                                                 | <b>Mean (Standard<br/>Deviation)</b> | <b>Mean (Standard<br/>Deviation)</b> |
| Age, years                                                         |                                                                 | 34.4 ± 8.6                           | 30.2 ± 9.2                           |
| Money spent on food per person per day,<br>Tanzanian Shillings*    |                                                                 | 587.3 ± 445.9                        | 580.1 ± 684.2                        |
| Hemoglobin, g/dL                                                   |                                                                 | 9.9 ± 1.8                            | 11.1 ± 1.7                           |
| Albumin, g/dL                                                      |                                                                 | 2.8 ± 1.0                            | 3.2 ± 1.1                            |
| CD3 T-cell count, cells/μL                                         |                                                                 | 1228.0 ± 608.5                       | 1195.9 ± 404.8                       |
| CD4 T-cell counts, cells/μL                                        |                                                                 | 327.2 ± 246.2                        | 709.2 ± 250.8                        |
| CD8 T-cell counts, cells/μL                                        |                                                                 | 826.9 ± 447.5                        | 427.5 ± 188.2                        |
| Log(10) Viral Load, copies/mL                                      |                                                                 | 4.6 ± 1.0                            | N/A                                  |
| Body Mass Index, kg/m <sup>2</sup>                                 |                                                                 | 19.4 ± 2.8                           | 18.8 ± 2.5                           |
| Mid-Upper Arm Circumference, cm                                    |                                                                 | 23.4 ± 2.7                           | 23.1 ± 2.7                           |
| Follow-up time, days                                               |                                                                 | 916.8 ± 507.4                        | 1532.9 ± 331.4                       |
|                                                                    |                                                                 |                                      |                                      |
|                                                                    |                                                                 | <b>n (%)</b>                         | <b>n (%)</b>                         |
| Vitamin D insufficiency (serum 25-<br>hydroxyvitamin D <75 nmol/L) |                                                                 | 218 (63.4%)                          | 200 (60.1%)                          |

|  |                                                             |             |             |
|--|-------------------------------------------------------------|-------------|-------------|
|  |                                                             |             |             |
|  | Vitamin D deficiency (serum 25-hydroxyvitamin D <50 nmol/L) | 55 (16.0%)  | 51 (15.3%)  |
|  |                                                             |             |             |
|  | Sex                                                         |             |             |
|  | Male                                                        | 203 (59.0%) | 257 (77.2%) |
|  | Female                                                      | 141 (41.0%) | 76 (22.8%)  |
|  |                                                             |             |             |
|  | Center                                                      |             |             |
|  | Mwananyamala                                                | 79 (23.0%)  | 88 (26.4%)  |
|  | Temeke                                                      | 102 (29.7%) | 83 (24.9%)  |
|  | Tandale                                                     | 83 (24.1%)  | 91 (27.3%)  |
|  | Mbgala                                                      | 31 (9.0%)   | 70 (21.0%)  |
|  | Amana                                                       | 49 (14.2%)  | 1 (.3%)     |
|  |                                                             |             |             |
|  | Karnofsky Score <70%                                        | 45 (13.1%)  | 29 (8.7%)   |
|  |                                                             |             |             |
|  | Education Group                                             |             |             |
|  | None                                                        | 29 (8.4%)   | 36 (10.8%)  |
|  | Low <5years                                                 | 35 (10.2%)  | 31 (9.3%)   |
|  | Primary 5-8 years                                           | 238 (69.2%) | 233 (70.0%) |
|  | Secondary/University                                        | 42 (12.2%)  | 33 (9.9%)   |
|  |                                                             |             |             |

|  |                                       |             |             |
|--|---------------------------------------|-------------|-------------|
|  | Cohabits with a Partner               | 200 (58.1%) | 168 (50.5%) |
|  |                                       |             |             |
|  | Assets at home                        |             |             |
|  | None                                  | 92 (26.9%)  | 108 (32.4%) |
|  | One                                   | 89 (26.0%)  | 85 (25.5%)  |
|  | 2-3                                   | 122 (35.7%) | 114 (34.2%) |
|  | 4-5                                   | 39 (11.4%)  | 26 (7.8%)   |
|  |                                       |             |             |
|  | WHO HIV Disease Stage                 |             |             |
|  | 3                                     | 240 (90.9%) | N/A         |
|  | 4                                     | 24 (9.1%)   |             |
|  |                                       |             |             |
|  | CD4 T-cell categories, cells/ $\mu$ L |             |             |
|  | 0-199                                 | 97 (35.9%)  | 0 (.0%)     |
|  | 200-499                               | 116 (43.0%) | 69 (22.9%)  |
|  | 500+                                  | 57 (21.1%)  | 232 (77.1%) |
|  |                                       |             |             |
|  | WHO BMI Group, kg/m <sup>2</sup>      |             |             |
|  | <16                                   | 26 (7.7%)   | 33 (9.9%)   |
|  | 16-16.99                              | 37 (10.9%)  | 45 (13.6%)  |
|  | 17-18.49                              | 73 (21.5%)  | 88 (26.5%)  |
|  | 18.5-19.99                            | 79 (23.3%)  | 70 (21.1%)  |
|  | 20-21.99                              | 77 (22.7%)  | 69 (20.8%)  |

|                                                                         |     |            |           |
|-------------------------------------------------------------------------|-----|------------|-----------|
|                                                                         | 22+ | 47 (13.9%) | 27 (8.1%) |
|                                                                         |     |            |           |
| * 1 US Dollar $\cong$ 1000 Tanzanian Shillings at the time of the study |     |            |           |

For peer review only

| <b>Table 2</b>                       |                | <b>Vitamin D Status and Mortality and HIV Disease Progression in HIV-infected TB Patients</b> |                |                     |                |
|--------------------------------------|----------------|-----------------------------------------------------------------------------------------------|----------------|---------------------|----------------|
|                                      |                | <b>Univariate</b>                                                                             |                | <b>Multivariate</b> |                |
| <b>Outcome</b>                       | <b>n/N (%)</b> | <b>RR (95% CI)</b>                                                                            | <b>p-value</b> | <b>RR (95% CI)</b>  | <b>p-value</b> |
| <b>Mortality</b>                     |                |                                                                                               |                |                     |                |
| Vitamin D insufficiency (<75 nmol/L) | 61/218 (28.0%) | 0.73 (0.50, 1.08)                                                                             | 0.12           | 0.70 (0.47, 1.04)   | 0.08           |
| Adequate Vitamin D                   | 43/126 (34.1%) |                                                                                               |                |                     |                |
| Vitamin D deficient (<50 nmol/L)     | 20/55 (36.4%)  | 1.34 (0.82, 2.18)                                                                             | 0.25           | 0.91 (0.55 1.50)    | 0.71           |
| Not deficient                        | 84/289 (29.1%) |                                                                                               |                |                     |                |
| Continuous Vitamin D (nmol/L)        |                | 1.00 (0.99, 1.01)                                                                             | 0.49           | 1.01 (1.00, 1.02)   | 0.15           |
| <b>HIV Disease Progression</b>       |                |                                                                                               |                |                     |                |

|                                                                                                                                                        |                   |                   |             |                      |      |
|--------------------------------------------------------------------------------------------------------------------------------------------------------|-------------------|-------------------|-------------|----------------------|------|
| Vitamin D<br>insufficiency<br>( $<75$ nmol/L)                                                                                                          | 46/150<br>(30.7%) | 1.10 (0.67, 1.82) | 0.71        | 1.08 (0.64, 1.82)    | 0.78 |
| Adequate<br>Vitamin D                                                                                                                                  | 23/90<br>(25.6%)  | Reference         |             | Reference            |      |
| Vitamin D<br>deficient ( $<50$<br>nmol/L)                                                                                                              | 14/34<br>(41.2%)  | 1.91 (1.05, 3.44) | <b>0.03</b> | 1.48 (0.78, 2.82)    | 0.23 |
| Not deficient                                                                                                                                          | 55/206<br>(26.7%) | Reference         |             | Reference            |      |
| Continuous Vitamin D<br>(nmol/L)                                                                                                                       |                   | 0.99 (0.98, 1.01) | 0.30        | 1.00 (0.99,<br>1.01) | 0.57 |
| p-values obtained using Cox Proportional Hazards Regression; RR: Risk Ratio; 95%<br>CI: 95% Confidence Interval                                        |                   |                   |             |                      |      |
| Multivariate analyses adjusted for Age, Karnofsky Score, Baseline Hemoglobin, Viral Load,<br>HIV Status, CD4 Counts, and Micronutrient Supplementation |                   |                   |             |                      |      |

| <b>Table 3</b>                                                                                      |                   | <b>Vitamin D Status and Treatment Outcomes in TB Patients</b> |                |                    |                     |  |
|-----------------------------------------------------------------------------------------------------|-------------------|---------------------------------------------------------------|----------------|--------------------|---------------------|--|
|                                                                                                     |                   | <b>Univariate</b>                                             |                |                    | <b>Multivariate</b> |  |
| <b>Outcome</b>                                                                                      | <b>n/N (%)</b>    | <b>RR (95% CI)</b>                                            | <b>p-value</b> | <b>RR (95% CI)</b> | <b>p-value</b>      |  |
| <b>Treatment Failure by 1 month post-treatment initiation</b>                                       |                   |                                                               |                |                    |                     |  |
| Vitamin D<br>insufficiency<br>( $<75$ nmol/L)                                                       | 58/298<br>(19.5%) | 1.06 (0.72, 1.55)                                             | 0.77           | 1.02 (0.70, 1.49)  | 0.93                |  |
| Adequate<br>Vitamin D                                                                               | 34/185<br>(18.4%) |                                                               |                |                    |                     |  |
| Vitamin D<br>deficient ( $<50$<br>nmol/L)                                                           | 15/75<br>(20.0%)  | 1.06 (0.65, 1.74)                                             | 0.82           | 1.13 (0.69, 1.86)  | 0.63                |  |
| Not deficient                                                                                       | 77/408<br>(18.9%) |                                                               |                |                    |                     |  |
| Continuous Vitamin D<br>(nmol/L)                                                                    |                   | 1.00 (0.99, 1.01)                                             | 0.49           | 1.00 (0.99, 1.01)  | 0.50                |  |
| <b>Any Relapse (relapse after 1 month post-treatment initiation if culture negative at 1 month)</b> |                   |                                                               |                |                    |                     |  |
| Vitamin D<br>insufficiency                                                                          | 51/227<br>(22.5%) | 1.56 (0.98, 2.48)                                             | 0.06           | 1.66 (1.04, 2.64)  | <b>0.03</b>         |  |



|                                                                                                                                                     |                                        |                   |                   |      |                   |             |
|-----------------------------------------------------------------------------------------------------------------------------------------------------|----------------------------------------|-------------------|-------------------|------|-------------------|-------------|
|                                                                                                                                                     | (<75 nmol/L)                           |                   |                   |      |                   |             |
|                                                                                                                                                     | Adequate<br>Vitamin D                  | 21/146<br>(14.4%) |                   |      |                   |             |
|                                                                                                                                                     |                                        |                   |                   |      |                   |             |
|                                                                                                                                                     | Vitamin D<br>deficient (<50<br>nmol/L) | 13/56<br>(23.2%)  | 1.25 (0.73, 2.12) | 0.41 | 1.40 (0.82, 2.39) | 0.21        |
|                                                                                                                                                     | Not deficient                          | 59/317<br>(18.6%) |                   |      |                   |             |
|                                                                                                                                                     |                                        |                   |                   |      |                   |             |
|                                                                                                                                                     | Continuous Vitamin D<br>(nmol/L)       |                   | 0.99 (0.98, 1.00) | 0.06 | 0.99 (0.98, 1.00) | <b>0.04</b> |
|                                                                                                                                                     |                                        |                   |                   |      |                   |             |
| p-values obtained using Binomial Regression; RR: Risk Ratio; 95% CI: 95% Confidence Interval                                                        |                                        |                   |                   |      |                   |             |
| Multivariate analyses adjusted for Age, Karnofsky Score, Baseline Hemoglobin, Viral Load, HIV Status, CD4 Counts, and Micronutrient Supplementation |                                        |                   |                   |      |                   |             |

1  
2  
3  
4  
5  
6  
7  
8  
9  
10  
11  
12  
13  
14  
15  
16  
17  
18  
19  
20  
21  
22  
23  
24  
25  
26  
27  
28  
29  
30  
31  
32  
33  
34  
35  
36  
37  
38  
39  
40  
41  
42  
43  
44  
45  
46  
47  
48  
49

| Table 4 | Vitamin D Status and T-cell Counts (cells/ $\mu$ L) in TB Patients |                                                                |                                                                         |         |  |                                                       |                                                                         |                                                                         |         |  |                                                       |                                                                         |
|---------|--------------------------------------------------------------------|----------------------------------------------------------------|-------------------------------------------------------------------------|---------|--|-------------------------------------------------------|-------------------------------------------------------------------------|-------------------------------------------------------------------------|---------|--|-------------------------------------------------------|-------------------------------------------------------------------------|
|         | CD4 T-cells                                                        |                                                                |                                                                         |         |  | CD8 T-cells                                           |                                                                         |                                                                         |         |  | CD3 T-cells                                           |                                                                         |
| Outcome | Adequate vitamin D, mean difference (SD) <sup>a</sup>              | Vitamin D insufficiency, mean difference (95% CI) <sup>b</sup> | Vitamin D insufficiency, adjusted mean difference (95% CI) <sup>c</sup> | p-value |  | Adequate vitamin D, mean difference (SD) <sup>a</sup> | Vitamin D insufficiency, adjusted mean difference (95% CI) <sup>b</sup> | Vitamin D insufficiency, adjusted mean difference (95% CI) <sup>c</sup> | p-value |  | Adequate vitamin D, mean difference (SD) <sup>a</sup> | Vitamin D insufficiency, adjusted mean difference (95% CI) <sup>c</sup> |
|         |                                                                    |                                                                |                                                                         |         |  |                                                       |                                                                         |                                                                         |         |  |                                                       |                                                                         |

1  
2  
3  
4  
5  
6  
7  
8  
9  
10  
11  
12  
13  
14  
15  
16  
17  
18  
19  
20  
21  
22  
23  
24  
25  
26  
27  
28  
29  
30  
31  
32  
33  
34  
35  
36  
37  
38  
39  
40  
41  
42  
43  
44  
45  
46  
47  
48  
49

| Entire follow-up: HIV-infected patients   |              |              |              |          |              |               |               |                         |               |                |                |                        |  |
|-------------------------------------------|--------------|--------------|--------------|----------|--------------|---------------|---------------|-------------------------|---------------|----------------|----------------|------------------------|--|
| Vitamin D insufficiency (<75 nmol/L)      | 300<br>(234) | 17 (-23, 56) | 21 (-18, 59) | 0.2<br>9 | 902<br>(457) | 88 (7, 169)   | 85 (4, 165)   | <b>0.0</b><br><b>4</b>  | 1298<br>(635) | 101 (-4, 206)  | 103 (-5, 212)  | 0.0<br>6               |  |
| Vitamin D deficient (<50 nmol/L)          | 333<br>(225) | 21 (-34, 76) | 30 (-26, 86) | 0.2<br>9 | 957<br>(424) | 105 (-9, 219) | 114 (-6, 234) | 0.0<br>6                | 1392<br>(595) | 104 (-47, 255) | 125 (-28, 279) | 0.1<br>1               |  |
| Continuous Vitamin D (per nmol/L)         |              | 0 (-1, 1)    | -1 (-1, 0)   | 0.2<br>6 |              | -3 (-5, -1)   | -3 (-5, -1)   | <b>0.0</b><br><b>04</b> |               | -3 (-5, -1)    | -3 (-6, -1)    | <b>0.0</b><br><b>1</b> |  |
| Entire follow-up: HIV-uninfected patients |              |              |              |          |              |               |               |                         |               |                |                |                        |  |
| Vitamin D                                 | 771          | -2 (-)       | 3 (-45, 3)   | 0.9      | 508          | -25 (-)       | -22 (-)       | 0.2                     | 1351          | -37 (-)        | -28 (-)        | 0.4                    |  |

|                                                           |                                      |            |               |                |                        |            |               |               |                        |            |                |                |                        |
|-----------------------------------------------------------|--------------------------------------|------------|---------------|----------------|------------------------|------------|---------------|---------------|------------------------|------------|----------------|----------------|------------------------|
|                                                           | insufficiency (<75 nmol/L)           | (235 )     | 49, 45)       | 51)            | 1                      | (209 )     | 63, 14)       | 60, 17)       | 7                      | (400)      | 109, 35)       | 99, 44)        | 5                      |
|                                                           | Vitamin D deficient (<50 nmol/L)     | 781 (241 ) | -34 (-99, 30) | -34 (-101, 32) | 0.3<br>1               | 500 (195 ) | -1 (-64, 62)  | 3 (-61, 67)   | 0.9<br>3               | 1354 (397) | -33 (-136, 71) | -28 (-134, 79) | 0.6<br>1               |
|                                                           | Continuous Vitamin D (per nmol/L)    |            | 0 (-1, 1)     | 0 (-1, 1)      | 0.9<br>7               |            | 0 (-1, 1)     | 0 (-1, 1)     | 0.8<br>3               |            | 0 (-1, 2)      | 0 (-2, 2)      | 0.9<br>0               |
| <b>First 8 months of follow-up: HIV-infected patients</b> |                                      |            |               |                |                        |            |               |               |                        |            |                |                |                        |
|                                                           | Vitamin D insufficiency (<75 nmol/L) | 316 (237 ) | 54 (8, 100)   | 58 (13, 104)   | <b>0.0</b><br><b>1</b> | 868 (470 ) | 132 (29, 235) | 119 (15, 223) | <b>0.0</b><br><b>2</b> | 1279 (670) | 190 (42, 337)  | 179 (28, 331)  | <b>0.0</b><br><b>2</b> |

|                                                             |                                      |              |              |               |                        |              |               |               |                         |               |                |                |                         |
|-------------------------------------------------------------|--------------------------------------|--------------|--------------|---------------|------------------------|--------------|---------------|---------------|-------------------------|---------------|----------------|----------------|-------------------------|
|                                                             |                                      |              |              |               |                        |              |               |               |                         |               |                |                |                         |
|                                                             | Vitamin D deficient (<50 nmol/L)     | 372<br>(264) | 36 (-25, 97) | 41 (-20, 101) | 0.1<br>9               | 963<br>(471) | 63 (-77, 203) | 75 (-72, 221) | 0.3<br>2                | 1443<br>(689) | 67 (-125, 259) | 101 (-93, 295) | 0.3<br>1                |
|                                                             | Continuous Vitamin D (per nmol/L)    |              | -1 (-2, 0)   | -1 (-2, 0)    | <b>0.0</b><br><b>1</b> |              | -4 (-6, -1)   | -4 (-6, -1)   | <b>0.0</b><br><b>02</b> |               | -4 (-7, -1)    | -5 (-8, -2)    | <b>0.0</b><br><b>03</b> |
| <b>First 8 months of follow-up: HIV-uninfected patients</b> |                                      |              |              |               |                        |              |               |               |                         |               |                |                |                         |
|                                                             | Vitamin D insufficiency (<75 nmol/L) | 724<br>(243) | 1 (-52, 53)  | 6 (-47, 59)   | 0.8<br>2               | 461<br>(232) | -22 (-63, 20) | -17 (-57, 22) | 0.3<br>9                | 1248<br>(446) | -38 (-121, 46) | -27 (-106, 52) | 0.5<br>0                |
|                                                             | Vitamin D deficient                  | 731          | -7 (-        | -7 (-         | 0.8                    | 454          | 4 (-73,       | 5 (-71,       | 0.9                     | 1247          | 14 (-          | 17 (-          | 0.8                     |

1  
2  
3  
4  
5  
6  
7  
8  
9  
10  
11  
12  
13  
14  
15  
16  
17  
18  
19  
20  
21  
22  
23  
24  
25  
26  
27  
28  
29  
30  
31  
32  
33  
34  
35  
36  
37  
38  
39  
40  
41  
42  
43  
44  
45  
46  
47  
48  
49

|  |                                   |        |          |          |          |        |           |           |          |       |           |           |          |
|--|-----------------------------------|--------|----------|----------|----------|--------|-----------|-----------|----------|-------|-----------|-----------|----------|
|  | (<50 nmol/L)                      | (237 ) | 95, 80)  | 96, 81)  | 7        | (209 ) | 81)       | 81)       | 0        | (410) | 124, 153) | 123, 156) | 2        |
|  | Continuous Vitamin D (per nmol/L) |        | 0 (-2,1) | 0 (-2,1) | 0.5<br>4 |        | 0 (-1, 1) | 0 (-1, 1) | 0.7<br>3 |       | 0 (-2, 1) | 0 (-2, 1) | 0.5<br>7 |

<sup>a</sup> Data are the means (SD) of the average measurement during follow-up for each participant

<sup>b</sup> Data are the mean difference between the low and the adequate vitamin D group, as defined in Column B. The mean differences, 95% confidence intervals (CIs), and corresponding p-values were estimated from generalized estimating equations, after adjustment for baseline measurements, follow-up time, and treatment (micronutrients vs. placebo) group.

<sup>c</sup> Multivariate analyses additionally adjusted for Age, Karnofsky Score, and Baseline Hemoglobin

1  
2  
3  
4  
5  
6  
7  
8  
9  
10  
11  
12  
13  
14  
15  
16  
17  
18  
19  
20  
21  
22  
23  
24  
25  
26  
27  
28  
29  
30  
31  
32  
33  
34  
35  
36  
37  
38  
39  
40  
41  
42  
43  
44  
45  
46  
47  
48  
49

| Table 5 Vitamin D Status and Nutritional Parameters in TB Patients |                                            |                                                                |                                                                         |         |                                            |                                                                |                                                                         |         |                                            |                                                                |                                                                         |         |
|--------------------------------------------------------------------|--------------------------------------------|----------------------------------------------------------------|-------------------------------------------------------------------------|---------|--------------------------------------------|----------------------------------------------------------------|-------------------------------------------------------------------------|---------|--------------------------------------------|----------------------------------------------------------------|-------------------------------------------------------------------------|---------|
|                                                                    | Body Mass Index (kg/m <sup>2</sup> )       |                                                                |                                                                         |         | Albumin concentration (g/dL)               |                                                                |                                                                         |         | Hemoglobin concentration (g/dL)            |                                                                |                                                                         |         |
| Outcome                                                            | Adequate vitamin D, mean (SD) <sup>a</sup> | Vitamin D insufficiency, mean difference (95% CI) <sup>b</sup> | Vitamin D insufficiency, adjusted mean difference (95% CI) <sup>c</sup> | p-value | Adequate vitamin D, mean (SD) <sup>a</sup> | Vitamin D insufficiency, mean difference (95% CI) <sup>b</sup> | Vitamin D insufficiency, adjusted mean difference (95% CI) <sup>c</sup> | p-value | Adequate vitamin D, mean (SD) <sup>a</sup> | Vitamin D insufficiency, mean difference (95% CI) <sup>b</sup> | Vitamin D insufficiency, adjusted mean difference (95% CI) <sup>c</sup> | p-value |
| Entire                                                             |                                            |                                                                |                                                                         |         |                                            |                                                                |                                                                         |         |                                            |                                                                |                                                                         |         |

1  
2  
3  
4  
5  
6  
7  
8  
9  
10  
11  
12  
13  
14  
15  
16  
17  
18  
19  
20  
21  
22  
23  
24  
25  
26  
27  
28  
29  
30  
31  
32  
33  
34  
35  
36  
37  
38  
39  
40  
41  
42  
43  
44  
45  
46  
47  
48  
49

|                                      |                 |                        |                        |      |                |                        |                       |          |                 |                        |                        |          |  |
|--------------------------------------|-----------------|------------------------|------------------------|------|----------------|------------------------|-----------------------|----------|-----------------|------------------------|------------------------|----------|--|
| <b>follow-up:</b>                    |                 |                        |                        |      |                |                        |                       |          |                 |                        |                        |          |  |
| <b>All patients</b>                  |                 |                        |                        |      |                |                        |                       |          |                 |                        |                        |          |  |
| Vitamin D insufficiency (<75 nmol/L) | 21.20<br>(2.80) | -0.06<br>(-0.30, 0.17) | -0.08<br>(-0.30, 0.14) | 0.46 | 3.42<br>(0.74) | -0.05<br>(-0.14, 0.04) | 0.00<br>(-0.08, 0.08) | 0.9<br>7 | 12.65<br>(1.80) | -0.16<br>(-0.40, 0.08) | -0.18<br>(-0.41, 0.05) | 0<br>12  |  |
| Vitamin D deficient (<50 nmol/L)     | 21.23<br>(3.00) | -0.16<br>(-0.46, 0.14) | -0.14<br>(-0.44, 0.15) | 0.34 | 3.42<br>(0.72) | -0.05<br>(-0.17, 0.07) | 0.02<br>(-0.08, 0.13) | 0.65     | 12.42<br>(1.87) | 0.15<br>(-0.16, 0.45)  | 0.17<br>(-0.11, 0.45)  | 0.2<br>4 |  |



|                             |                                                  |                      |                         |                         |             |  |                        |                          |                       |      |                       |                        |                        |          |
|-----------------------------|--------------------------------------------------|----------------------|-------------------------|-------------------------|-------------|--|------------------------|--------------------------|-----------------------|------|-----------------------|------------------------|------------------------|----------|
|                             | Continuous Vitamin D (per nmol/L)                | 0.00<br>(0.00, 0.01) | 0.00<br>(0.00, 0.01)    | 0.30                    |             |  | 0.002<br>(0.00, 0.004) | 0.000<br>(-0.002, 0.002) | 0.90                  |      | 0.00<br>(-0.01, 0.01) | 0.00<br>(0.00, 0.01)   | 0.8<br>5               |          |
| <b>For peer review only</b> |                                                  |                      |                         |                         |             |  |                        |                          |                       |      |                       |                        |                        |          |
|                             | <b>First 8 months of follow-up: All patients</b> |                      |                         |                         |             |  |                        |                          |                       |      |                       |                        |                        |          |
|                             | Vitamin D insufficiency (<75 nmol/L)             | 20.96<br>(2.73)      | -0.20<br>(-0.40, -0.01) | -0.21<br>(-0.39, -0.02) | <b>0.03</b> |  | 3.42<br>(1.09)         | -0.01<br>(-0.18, 0.16)   | 0.04<br>(-0.13, 0.21) | 0.65 | 12.12<br>(1.85)       | -0.01<br>(-0.28, 0.26) | -0.04<br>(-0.31, 0.23) | 0.7<br>8 |

1  
2  
3  
4  
5  
6  
7  
8  
9  
10  
11  
12  
13  
14  
15  
16  
17  
18  
19  
20  
21  
22  
23  
24  
25  
26  
27  
28  
29  
30  
31  
32  
33  
34  
35  
36  
37  
38  
39  
40  
41  
42  
43  
44  
45  
46  
47  
48  
49

1  
2  
3  
4  
5  
6  
7  
8  
9  
10  
11  
12  
13  
14  
15  
16  
17  
18  
19  
20  
21  
22  
23  
24  
25  
26  
27  
28  
29  
30  
31  
32  
33  
34  
35  
36  
37  
38  
39  
40  
41  
42  
43  
44  
45  
46  
47  
48  
49

|                                   |                 |                       |                       |      |                |                          |                          |      |  |                 |                       |                       |          |  |
|-----------------------------------|-----------------|-----------------------|-----------------------|------|----------------|--------------------------|--------------------------|------|--|-----------------|-----------------------|-----------------------|----------|--|
|                                   |                 |                       |                       |      |                |                          |                          |      |  |                 |                       |                       |          |  |
| Vitamin D deficient (<50 nmol/L)  | 20.85<br>(2.84) | 0.00<br>(-0.25, 0.25) | 0.04<br>(-0.21, 0.29) | 0.78 | 3.41<br>(1.08) | -0.11<br>(-0.32, 0.10)   | -0.05<br>(-0.27, 0.17)   | 0.64 |  | 11.92<br>(1.99) | 0.16<br>(-0.18, 0.50) | 0.21<br>(-0.10, 0.53) | 0.1<br>9 |  |
| Continuous Vitamin D (per nmol/L) |                 | 0.00<br>(0.00, 0.01)  | 0.00<br>(0.00, 0.01)  | 0.38 |                | 0.000<br>(-0.003, 0.005) | 0.000<br>(-0.004, 0.004) | 0.87 |  |                 | 0.00<br>(-0.01, 0.00) | 0.00<br>(-0.01, 0.00) | 0.5<br>7 |  |

<sup>a</sup>Data are the means (SD) of the average measurement during follow-up for each participant

<sup>b</sup>Data are the mean difference between the low and the adequate vitamin D group, as defined in Column B. The mean differences, 95% confidence intervals (CIs), and corresponding p-values were estimated from generalized estimating equations, after adjustment for baseline

1  
2  
3  
4  
5 measurements, follow-up time, and treatment (micronutrients vs. placebo) group.  
6

7 <sup>c</sup> Multivariate analyses additionally adjusted for Age, Karnofsky Score, Baseline Hemoglobin, Viral Load, CD4 Count, and HIV Status;  
8  
9 HIV status removed from the model where the results are stratified by HIV status. Viral Load also removed from the model in HIV-  
10  
11 uninfected individuals.  
12  
13  
14  
15  
16  
17  
18  
19  
20  
21  
22  
23  
24  
25  
26  
27  
28  
29  
30  
31  
32  
33  
34  
35  
36  
37  
38  
39  
40  
41  
42  
43  
44  
45  
46  
47  
48  
49

1  
2  
3  
4  
5  
6  
7  
8  
9  
10  
11  
12  
13  
14  
15  
16  
17  
18  
19  
20  
21  
22  
23  
24  
25  
26  
27  
28  
29  
30  
31  
32  
33  
34  
35  
36  
37  
38  
39  
40  
41  
42  
43  
44  
45  
46  
47  
48  
49  
50  
51  
52  
53  
54  
55  
56  
57  
58  
59  
60

For peer review only

## Vitamin D Status and TB Treatment Outcomes in Adult Tanzanian Patients

Saurabh Mehta<sup>1</sup>, Ferdinand M. Mugusi<sup>2</sup>, Ronald J. Bosch<sup>3</sup>, Said Aboud<sup>4</sup>, Willy Urassa<sup>5</sup>,  
Eduardo Villamor<sup>6</sup>, Wafaie W. Fawzi<sup>7</sup>

Corresponding Author: Saurabh Mehta, M.B.B.S., Sc.D.

Division of Nutritional Sciences, Cornell University

314 Savage Hall, Ithaca NY 14853

Phone: +1-607-255-2640; Fax: +1-607-255-1033; E-mail: [smehta@cornell.edu](mailto:smehta@cornell.edu)

Word Count: 3743 words

Number of figures: 2

Number of tables: 5

Online Supplementary Information: 2 tables

Running Title: Vitamin D and Tuberculosis

Keywords: Vitamin D, Tuberculosis, HIV, Africa

---

<sup>1</sup> Division of Nutritional Sciences, Cornell University, Ithaca NY 14853

<sup>2</sup> Department of Internal Medicine, Muhimbili University of Health and Allied Sciences, Dar es Salaam, Tanzania

<sup>3</sup> Department of Biostatistics, Harvard School of Public Health, Boston MA 02115

<sup>4</sup> Department of Microbiology and Immunology, Muhimbili University of Health and Allied Sciences, Dar es Salaam, Tanzania

<sup>5</sup> Diagnostics and Laboratory Technology Team, World Health Organization, Geneva, Switzerland

<sup>6</sup> Department of Epidemiology, University of Michigan School of Public Health, Ann Arbor MI 48109

<sup>7</sup> Departments of Global Health and Population, Nutrition, and Epidemiology, Harvard School of Public Health, Boston MA 02115

1  
2  
3 1 *Abstract*

4 2 **Objectives:** Vitamin D is an immunomodulator and can alter response to tuberculosis  
5  
6 treatment, though randomized trials have been inconclusive to date. We present the first  
7  
8 comprehensive analysis of the associations between vitamin D status and TB treatment,  
9  
10 T-cell counts, and nutritional outcomes by HIV status.  
11  
12  
13

14  
15  
16  
17 7 **Design:** Cohort study  
18  
19  
20  
21

22 9 **Setting:** Outpatient clinics in Tanzania  
23  
24  
25  
26

27 11 **Participants:** 25-hydroxyvitamin D levels were assessed in a cohort of 677 patients with  
28  
29 TB (344 HIV-infected) initiating anti-TB treatment at enrollment in a multivitamin  
30  
31 supplementation (excluding vitamin D) trial (Clinicaltrials.gov identifier:  
32  
33 [NCT00197704](#)).  
34  
35  
36  
37  
38

39 16 **Primary and secondary outcome measures:** Information on treatment outcomes such as  
40  
41 failure and relapse, HIV disease progression, T-cell counts, and anthropometry was  
42  
43 collected routinely, with a median follow-up of 52 and 30 months for HIV-uninfected and  
44  
45 HIV-infected patients, respectively. Cox and binomial regression, and generalized  
46  
47 estimating equations were used to assess the association of vitamin D status with these  
48  
49 outcomes.  
50  
51  
52  
53  
54  
55  
56  
57  
58  
59  
60

1  
2  
3  
4 23 **Results:** Mean 25-hydroxyvitamin D concentrations at enrollment were 69.8 ( $\pm$ 21.5)  
5  
6 24 nmol/L [27.9 ( $\pm$ 8.6) ng/mL]. Vitamin D insufficiency (<75 nmol/L) was associated with  
7  
8 25 a 66% higher risk of relapse (95% CI: 4%, 164%; 133% higher risk in HIV-uninfected  
9  
10 26 patients). Each unit higher vitamin D levels at baseline were associated with a decrease of  
11  
12 27 3 ( $p=0.004$ ) CD8 and 3 ( $p=0.01$ ) CD3 T-cells/ $\mu$ L during follow-up in HIV-infected  
13  
14 28 patients. Vitamin D insufficiency was also associated with a greater decrease of BMI (-  
15  
16 29 0.21 kg/m<sup>2</sup>; 95% CI:-0.39, -0.02), during the first eight months of follow-up. No  
17  
18 30 association was observed for vitamin D status with mortality or HIV disease progression.  
19  
20 31

21  
22 32 **Conclusions:** Adequate vitamin D status is associated with a lower risk of relapse and  
23  
24 33 with improved nutritional indicators such as BMI in TB patients, with or without HIV  
25  
26 34 infection. Further research is needed to determine the optimal dose of vitamin D and  
27  
28 35 effectiveness of daily vitamin D supplementation among patients with TB.  
29  
30  
31  
32  
33  
34  
35  
36  
37  
38  
39  
40  
41  
42  
43  
44  
45  
46  
47  
48  
49  
50  
51  
52  
53  
54  
55  
56  
57  
58  
59  
60

1  
2  
3 38 **Article Focus:** Recent laboratory data has suggested that optimal vitamin D status may  
4  
5 39 be associated with a more effective immune response to TB infection, a faster rate of  
6  
7  
8 40 bacteriologic cure, and better long-term outcomes. However, clinical and epidemiological  
9  
10  
11 41 studies have found inconsistent results. In this paper, we present the first comprehensive  
12  
13 42 analysis of the associations between vitamin D status and TB treatment, T-cell counts,  
14  
15 43 and nutritional outcomes by HIV status.  
16  
17  
18 44

19  
20 45 **Key Messages:** We found that patients with adequate vitamin D status were less likely to  
21  
22 46 experience a relapse during follow-up after completing TB treatment. They were also  
23  
24 47 more likely to have a better nutritional status, as assessed by their body mass index,  
25  
26  
27 48 during follow-up, compared to patients with vitamin D insufficiency. The results provide  
28  
29 49 justification for conducting both a dose response study to determine optimal dose of  
30  
31 50 vitamin D and a randomized controlled trial of daily vitamin D supplementation among  
32  
33  
34 51 patients with TB.  
35  
36  
37 52

38  
39 53 **Strengths and Limitations of this study:** The major strengths of this study include a  
40  
41 54 large number of participants, more than half of whom were HIV-infected, comprehensive  
42  
43 55 assessment of clinical, immunological, socio-demographic, and nutritional parameters,  
44  
45  
46 56 and a long duration of follow-up. On the other hand, the major limitation is the possibility  
47  
48 57 of reverse causation and residual confounding. We have attempted to minimize this  
49  
50  
51 58 through rigorous analyses and adjusting for several potential confounders, including  
52  
53 59 hemoglobin concentrations, HIV status, viral load, CD4 T-cells, and Karnofsky score, in  
54  
55 60 most analyses.  
56  
57  
58  
59  
60



1  
2  
3 61 **Introduction**  
4

5 62 *Mycobacterium tuberculosis* is one of the most pernicious infectious diseases and  
6  
7  
8 63 successful pathogens known to man. More than 95% of the estimated cases and deaths  
9  
10 64 due to tuberculosis (TB) occur in low-income countries. The United Republic of  
11  
12 65 Tanzania is one of the 22 high-burden countries that account for 80% of global TB cases.  
13  
14 66 Tanzania has an incidence of 177 cases per 100,000 population per year and a prevalence  
15  
16 67 of 183 cases per 100,000 population per year [1].  
17  
18  
19

20 68  
21  
22 69 The spread of Human Immunodeficiency Virus (HIV) has fuelled the resurgence of the  
23  
24 70 TB epidemic in Tanzania, as in other parts of sub-Saharan Africa [2]. HIV is the  
25  
26 71 strongest factor in the development of active TB; it is estimated that only one out of ten  
27  
28 72 immunocompetent persons infected with TB develops active TB in his/her lifetime;  
29  
30 73 whereas, one out of ten HIV-infected persons infected with TB will develop active TB  
31  
32 74 every year. An estimated 38% of TB patients in Tanzania are also infected with HIV [1].  
33  
34  
35

36 75  
37  
38 76 Current treatment regimens, given under appropriate management conditions, are nearly  
39  
40 77 100% curative for patients with drug-susceptible organisms. However, in Tanzania,  
41  
42 78 treatment fails in 12-17% of the cases. Additionally, TB patients in settings such as  
43  
44 79 Tanzania grapple with multiple health-related and quality of life issues, which are not  
45  
46 80 addressed adequately with treatment alone.  
47  
48  
49

50 81  
51  
52 82 Recent data has suggested that optimal vitamin D status may be associated with a more  
53  
54 83 effective immune response to TB infection, a faster rate of bacteriologic cure, and better  
55  
56  
57  
58  
59  
60

1  
2  
3 84 long-term outcomes. For example, a recent cross-sectional study found that vitamin D  
4  
5 85 deficiency is highly prevalent in South Africa and is associated with susceptibility to  
6  
7  
8 86 active TB both in the presence and absence of HIV infection [3]. A few randomized trials  
9  
10 87 have also been conducted; two of the recent ones failed to find an effect of vitamin D  
11  
12 88 supplementation on treatment success [4 5]. However, the dose used and duration of  
13  
14 89 supplementation may have precluded finding an effect. Further, most studies had small  
15  
16 90 sample sizes and assessed only a limited number of covariates.  
17  
18  
19

20 91  
21  
22 92 In this manuscript, we comprehensively examined the hypotheses that vitamin D status  
23  
24 93 may be associated with response to treatment, risk of treatment failure, laboratory  
25  
26 94 parameters such as T-cell counts, and anthropometric measurements in the context of a  
27  
28 95 randomized trial of micronutrient supplementation (supplement did not contain vitamin  
29  
30 96 D) in Tanzania to better inform future studies or trials.  
31  
32  
33

### 34 97 35 36 98 ***Materials and Methods***

37  
38 99 Study Population: The study population and recruitment methods have been described in  
39  
40 100 detail earlier [6]. Briefly, 887 adults with pulmonary tuberculosis (PTB) were enrolled in  
41  
42 101 a randomized trial (Clinicaltrials.gov identifier: NCT00197704) to examine the effects of  
43  
44 102 micronutrient supplementation on TB treatment failure, relapse, and mortality. The trial  
45  
46 103 started in April 2000 in Dar es Salaam, Tanzania and continued until April 2005. The  
47  
48 104 eligibility criteria for the study included positive sputum smears for acid-fast bacilli  
49  
50 105 (AFB), age between 18 and 65 years, Karnofsky performance score of  $\geq 40\%$  [7], plan to  
51  
52 106 stay in Dar es Salaam for 2 years, not being pregnant, and not having received anti-TB  
53  
54  
55  
56  
57  
58  
59  
60

1  
2  
3 107 treatment during the previous one year. Consenting subjects were randomly assigned in  
4  
5 108 computer-generated permuted blocks of 20, stratified by HIV status, to receive a daily  
6  
7  
8 109 oral dose of 1 of 2 regimens: micronutrients (5000 IU of retinol, 20 mg of vitamin B1,  
9  
10 110 20mg of vitamin B2, 25mg of vitamin B<sub>6</sub>, 100 mg of niacin, 50 µg of vitamin B<sub>12</sub>, 500  
11  
12 111 mg of vitamin C, 200 mg of vitamin E, 0.8 mg of folic acid, and 100 µg of selenium) or  
13  
14 112 placebo. These doses represent between 6 and 10 times the recommended dietary  
15  
16 113 allowance (RDA) and were being tested at the time among HIV-infected adults from this  
17  
18 114 setting [8]. We chose multiples of the RDA because previous observational studies  
19  
20 115 suggested that HIV-infected individuals need higher dietary intakes of micronutrients to  
21  
22 116 achieve normal serum concentrations [9]. All patients received a daily combination of  
23  
24 117 rifampicin, isoniazid, pyrazinamide, and ethambutol under direct observation of a health  
25  
26 118 worker during the first 2 months (intensive phase) followed by 6 months of self-  
27  
28 119 administered daily isoniazid and ethambutol, as per the Tanzania National TB and  
29  
30 120 Leprosy Programme guidelines. None of the HIV-infected patients received antiretroviral  
31  
32 121 therapy, as these medications were not routinely available in Tanzania at the time this  
33  
34 122 trial was conducted.  
35  
36  
37  
38  
39  
40  
41  
42

43 124 At the time of randomization, research nurses collected information on various socio-  
44  
45 125 demographic characteristics including age, education levels, marital status, and  
46  
47 126 socioeconomic status. Anthropometric measurements were also obtained using  
48  
49 127 standardized procedures [10] at the randomization visit as well as during each monthly  
50  
51 128 follow-up visit. Height was measured to the nearest 0.1 cm using SECA Bodymeter 206  
52  
53 129 stadiometers, weight to the nearest 100 g with SECA 700 balance beam scales, and left  
54  
55  
56  
57  
58  
59  
60

1  
2  
3 130 mid-upper arm circumference (MUAC) at the midpoint between the acromion and  
4  
5 131 olecranon to the nearest 0.1 cm using non-stretchable tailor's tapes.  
6  
7  
8 132  
9  
10 133 Physician visits were scheduled every 3 months. During these visits, study physicians  
11  
12 134 inquired about the health of the subject during the preceding period and performed a  
13  
14 135 complete physical examination. The stage of HIV disease was assessed according to the  
15  
16 136 World Health Organization system [11].  
17  
18  
19  
20 137  
21  
22 138 Ethics Approval: A written informed consent was obtained from all the study  
23  
24 139 participants. The institutional review boards of the Muhimbili University of Health and  
25  
26 140 Allied Sciences, the Tanzanian National AIDS Control Program, and the Harvard School  
27  
28 141 of Public Health approved the study protocol.  
29  
30  
31  
32 142  
33  
34 143 Laboratory Methods: At the time of initiation of anti-TB treatment, HIV status was  
35  
36 144 assessed among consenting patients using 2 sequential ELISAs (Wellcozyme, Murex  
37  
38 145 Biotech; Enzygnost anti-HIV1/2 Plus, Dade Behring); discrepant results were resolved by  
39  
40 146 Western Blot test (Bio-rad, Genetic Systems). Both pre-test and post-test counseling was  
41  
42 147 provided. A blood sample also was obtained for measurement of hemoglobin and  
43  
44 148 albumin concentrations using AcT Diff II hematology analyzer (Beckman Coulter,  
45  
46 149 Miami) and Hitachi 911 analyzer (Roche Diagnostics), respectively. CD4, CD3, and CD8  
47  
48 150 T-cell counts were determined using FACScout or FACSCan systems (Becton  
49  
50 151 Dickinson, CA, USA). Viral load was also determined using the Amplicor HIV-1  
51  
52 152 monitor v1.5 assay (Roche Molecular Systems, Branchburg, NJ, USA).  
53  
54  
55  
56  
57  
58  
59  
60

1  
2  
3 153  
4  
5

6 154 Assessment of Vitamin D Status: Serum 25-hydroxyvitamin D concentrations were  
7  
8 155 measured using liquid chromatography-mass spectrometry at the Children's Hospital in  
9  
10 156 Boston only at enrollment **before the initiation of micronutrient supplementation**. We  
11  
12 157 defined vitamin D insufficiency status as serum 25(OH)D levels of less than 75 nmol/L  
13  
14 158 and adequate otherwise. Vitamin D deficiency was defined as serum 25(OH)D levels of  
15  
16 159 less than 50 nmol/L.  
17  
18  
19

20 160  
21

22 161 Statistical Analysis: We examined the association of vitamin D status with TB treatment  
23  
24 162 outcomes as well as nutritional, immunological, and clinical end points in the entire  
25  
26 163 cohort and separately by HIV status at baseline. TB-related end points included treatment  
27  
28 164 failure, early relapse, and late relapse. Treatment failure by 1 month was defined as  
29  
30 165 positive AFB cultures at 1 month from the initiation of treatment. Relapses were deemed  
31  
32 166 to have occurred in patients with positive cultures, among those who had become culture  
33  
34 167 negative after treatment initiation. Relapses/recurrences included both endogenous  
35  
36 168 reactivation and exogenous reinfection, which could not be distinguished in this study.  
37  
38 169 We calculated the relative risks (RRs) and 95% confidence intervals (CIs) for each of  
39  
40 170 these outcomes by vitamin D status using binomial regression. We used Cox proportional  
41  
42 171 hazards models to assess the association of vitamin D status with mortality in all patients  
43  
44 172 and HIV disease progression from stage 3 to 4 in HIV-infected participants. We defined  
45  
46 173 the end of follow-up as the date when HIV stage was last assessed.  
47  
48  
49  
50  
51

52 174  
53  
54  
55  
56  
57  
58  
59  
60

1  
2  
3 175 We examined the association of vitamin D status with CD4, CD8, and CD3 T-cell counts,  
4  
5 176 viral load (in HIV-infected participants), indicators of nutritional status (body mass index  
6  
7 [BMI] and albumin concentrations), and hemoglobin concentrations using generalized  
8  
9 177  
10 178 estimating equations (GEEs). These models do not require that all patients have the same  
11  
12 179 number of follow-up assessments or that the follow-up measurements be obtained at  
13  
14 180 exactly the same time points. We assumed a standard normal distribution for repeated  
15  
16 181 continuous end points (T cell subsets,  $\log_{10}$  viral load, anthropometry, and albumin and  
17  
18 182 hemoglobin concentrations) and estimated average differences during follow-up by  
19  
20 183 vitamin D status. We used an exchangeable correlation structure to account for within-  
21  
22 184 subject correlations and adjusted the models for the follow-up time when the  
23  
24 185 measurements had been obtained and for the baseline values.  
25  
26  
27  
28  
29  
30  
31

32 187 We analyzed the data for the entire period and for the first 8 months, coinciding with the  
33  
34 188 expected end of TB treatment. Multivariate analyses adjusted for age, Karnofsky score,  
35  
36 189 baseline hemoglobin concentrations, viral load, HIV status, CD4 T-cell counts, and  
37  
38 190 micronutrient supplementation, unless otherwise specified in the results section or the  
39  
40 191 tables. All analyses were performed using SAS software version 9.3 (SAS Institute Inc.,  
41  
42 192 Cary NC).  
43  
44  
45  
46  
47

## 48 194 **Results**

49  
50 195 Baseline 25-hydroxyvitamin D concentrations were available for 677 patients out of the  
51  
52 196 original cohort of 887. Mean 25-hydroxyvitamin D concentration was 69.8 ( $\pm 21.5$ )  
53  
54 197 nmol/L [27.9 ( $\pm 8.6$ ) ng/mL] and its distribution is shown in Figure 1. The baseline  
55  
56  
57  
58  
59  
60

1  
2  
3 198 characteristics of these 677 patients by HIV status are presented in Table 1. 36% of the  
4  
5 199 HIV-infected patients had CD4 T-cell counts below 200 cells/ $\mu$ L. The mean body mass  
6  
7 200 index (BMI) was  $19.1 \pm 2.7$  kg/m<sup>2</sup>. The median follow-up time for HIV-uninfected  
8  
9 201 patients was 52 months (inter-quartile range [IQR]: 47-57 months) and for HIV-infected  
10  
11 202 patients was 30 months (IQR: 15-41 months).  
12  
13  
14  
15  
16  
17

18 204 The mean 25-hydroxyvitamin D concentrations were significantly different across season  
19  
20 205 of blood draw in this cohort (p=0.004). Tanzania has four seasons: dry (January-  
21  
22 206 February); long rains (March-June); dry (July-October); short rains (November-  
23  
24 207 December). The boxplot of vitamin D's association with season of blood draw is  
25  
26 208 presented in Figure 2. In subgroup analyses, this association was only observed among  
27  
28 209 the HIV-uninfected patients and not the HIV-infected patients.  
29  
30  
31  
32  
33

34 211 We examined the correlates of vitamin D insufficiency, defined as serum 25(OH)D  
35  
36 212 concentrations below 75 nmol/L (75 nmol/L) in Supplemental Tables 1 (HIV-uninfected)  
37  
38 213 and 2 (HIV-infected). All factors that had univariate associations with p<0.20 were  
39  
40 214 included in a multivariate model; only the factors that had p<0.05 were retained in the  
41  
42 215 final model. Among the HIV-uninfected subset, patients enrolled in the dry winter season  
43  
44 216 between July and October were 50% more likely to have vitamin D insufficiency,  
45  
46 217 compared to patients enrolled in the dry summer season between January and February (p  
47  
48 218 for season=0.002). Similarly, the participants with the lowest height were more likely to  
49  
50 219 have vitamin D insufficiency (p=0.01). Finally, greater expenditure on food per person  
51  
52 220 per day was associated with a lower risk of having inadequate vitamin D status (Risk  
53  
54  
55  
56  
57  
58  
59  
60

1  
2  
3 221 Ratio [RR] per 1000 Tanzanian Shillings [approximately 1 US Dollar at the time of the  
4  
5 222 study]: 0.76; 95% Confidence Interval [CI]: 0.59, 0.98). In the HIV-infected subset,  
6  
7 223 patients with higher hemoglobin concentrations at baseline were less likely to have  
8  
9 224 vitamin D insufficiency, with a 7% lower risk per 1 g/dL higher hemoglobin level  
10  
11 225 ( $p=0.007$ ). On the other hand, higher number of CD4 T-cells was associated with a higher  
12  
13 226 risk of having inadequate vitamin D status (4% higher risk per 100 CD4 T-cells/ $\mu\text{L}$ ;  
14  
15 227  $p=0.02$ ).

16  
17  
18  
19 228  
20  
21 229 There was no significant association of vitamin D status at TB treatment initiation with  
22  
23 230 mortality or HIV disease progression in this cohort (Table 2 includes only HIV-infected  
24  
25 231 participants as there were only 13 deaths in the HIV-uninfected subset). There was no  
26  
27 232 association observed between vitamin D status and treatment failure one month after  
28  
29 233 initiation of TB treatment (Table 3). However, patients with vitamin D insufficiency ( $<75$   
30  
31 234 nmol/L) had a 66% higher risk of relapse after becoming culture-negative at one month  
32  
33 235 after initiation of TB treatment (95% CI: 4%, 164%). This association was more  
34  
35 236 pronounced in those who were not HIV-infected at enrollment in the study (RR: 2.33;  
36  
37 237 95% CI: 1.26, 4.29). In analysis with continuous vitamin D levels, each nmol/L increase  
38  
39 238 was associated with a 1% lower risk of relapse during follow-up ( $p=0.04$ ).

40  
41 239  
42  
43 240 Vitamin D insufficiency was observed to have no association with CD4 T-cell counts  
44  
45 241 during the entire follow-up in either the HIV-infected or the HIV-uninfected subsets  
46  
47 242 (Table 4). However, vitamin D insufficiency was associated with greater CD4 T-cell  
48  
49  
50  
51  
52  
53  
54  
55  
56  
57  
58  
59  
60



1  
2  
3 243 counts during the first eight months of follow-up in the HIV-infected patients (mean  
4  
5 244 difference: 58; 95% CI: 13, 104).  
6  
7

8 245

9  
10 246 In analysis among HIV-infected patients with continuous vitamin D levels, each nmol/L  
11  
12 247 higher vitamin D concentration was associated with a decrease of 3 CD8 and 3 CD3 T-  
13  
14 248 cells per  $\mu\text{L}$ . Vitamin D insufficiency was associated with an average of 85 higher CD8  
15  
16 249 T-cells/ $\mu\text{L}$  during follow-up (95% CI: 4, 165). Similar results were observed when we  
17  
18 250 restricted the analyses to the first eight months of follow-up, the duration of TB treatment  
19  
20 251 at the time of the study in Tanzania. No relationship was observed with mean viral loads  
21  
22 252 during follow-up in the patients who were HIV-infected at the time of enrollment.  
23  
24  
25  
26

27 253

28  
29 254 In analysis examining association of vitamin D status with nutritional parameters in the  
30  
31 255 entire period of follow-up, no significant relationship was observed with BMI, albumin,  
32  
33 256 or hemoglobin concentrations (Table 5). During the first eight months of follow-up,  
34  
35 257 patients with Vitamin D Insufficiency experienced a decline in BMI (Mean:  $-0.21 \text{ kg/m}^2$ ;  
36  
37 258 95% CI:  $-0.39, -0.02$ ), compared to patients with adequate vitamin D status. These results  
38  
39 259 were more pronounced in HIV-uninfected patients (Mean:  $-0.34$ ; 95% CI:  $-0.60, -0.09$ )  
40  
41 260 and not significant in HIV-infected patients. HIV-infected patients with vitamin D  
42  
43 261 insufficiency had increased albumin levels (Mean:  $0.94$ ; 95% CI:  $0.55, 1.32$ ) during the  
44  
45 262 first eight months of follow-up compared to patients with adequate vitamin D status.  
46  
47  
48  
49

50 263

51  
52  
53 264 ***Discussion***  
54  
55  
56  
57  
58  
59  
60

1  
2  
3 265 In this study among 677 patients with tuberculosis in Tanzania, more than 61% of the  
4  
5 266 participants had 25-hydroxyvitamin D concentrations below 75 nmol/L (75 nmol/L). 25-  
6  
7  
8 267 hydroxyvitamin D concentrations were associated with the season of blood draw, money  
9  
10 268 spent on food per person per day, and height in HIV-uninfected participants and  
11  
12 269 hemoglobin concentrations and CD4 T-cell counts among HIV-infected patients. Vitamin  
13  
14 270 D insufficiency (<75 nmol/L) was not associated with mortality, HIV disease  
15  
16  
17 271 progression, or treatment failure during follow-up in the entire cohort. However, patients  
18  
19 272 with vitamin D insufficiency had an increased risk of experiencing TB relapse during  
20  
21 273 follow-up. Further, vitamin D insufficiency was associated with a decline in CD8 and  
22  
23 274 CD3 T-cells in both the first eight months (the duration of TB treatment) and the entire  
24  
25 275 period of follow-up. A similar relationship was observed with BMI in the first eight  
26  
27 276 months of follow-up.  
28  
29  
30  
31

32 277  
33  
34 278 Our study was conducted in Dar es Salaam, the largest urban center in Tanzania, and just  
35  
36 279 six degrees south of the Equator. The prevalence of vitamin D insufficiency (>61%) in  
37  
38 280 this study is higher than the approximately 40% found in a previous study among TB  
39  
40 281 patients in Mwanza, Tanzania [12] and in our studies among HIV-infected pregnant  
41  
42 282 women (~85% of them had stage 1 HIV disease, unlike this study) in Dar es Salaam [13  
43  
44 283 14]. However, this prevalence is lower than what was observed in a cross-sectional study  
45  
46 284 in South Africa, where 88% of HIV-uninfected and 97% of HIV-infected TB patients had  
47  
48 285 vitamin D insufficiency. The mean vitamin D concentration in this study was 69.8  
49  
50 286 nmol/L, compared to 86.5 nmol/L in the study in Mwanza and 28.8-40 nmol/L in the  
51  
52 287 South African study. One study from Thailand observed similar levels (69.0 nmol/L) in  
53  
54  
55  
56  
57  
58  
59  
60

1  
2  
3 288 TB patients [15]; Thailand is located at a similar distance from the Equator as Tanzania,  
4  
5 289 though it is in the northern hemisphere. Similar to the study in South Africa, the vitamin  
6  
7 290 D levels were lowest in our study in the dry winter season between July and October,  
8  
9 291 though the differences were not as stark. For example, the mean vitamin D concentration  
10  
11 292 in January to March in the South African study was 56.8 nmol/L and 30.8 nmol/L  
12  
13 293 between July and September, whereas in our study, the concentrations were 74.8 nmol/L  
14  
15 294 for January through February, and 66.3 nmol/L for July through October.  
16  
17  
18  
19  
20  
21

22 296 Vitamin D is synthesized in the skin through the action of ultraviolet light on 7-  
23  
24 297 dehydrocholesterol. Fatty fish, such as salmon and sardines, are good sources of vitamin  
25  
26 298 D in the diet but are not widely available everywhere and are usually expensive.  
27  
28 299 Increasing urbanization and a tendency to spend most time indoors are major factors that  
29  
30 300 contribute to the inability of the skin to synthesize adequate amounts of vitamin D [16-  
31  
32 301 18]. Additionally, the TB disease itself and/or the HIV co-infection in the participants in  
33  
34 302 this study are probably the primary reasons for restricted physical activity, lack of  
35  
36 303 adequate exposure to sunlight, and consequent low concentrations of vitamin D.  
37  
38  
39  
40

41 304  
42  
43 305 Several other investigators have examined correlates of vitamin D status in TB patients.  
44  
45 306 The study in Mwanza found that marital status, BMI, and serum transferrin receptor  
46  
47 307 concentrations were correlated with vitamin D status. Though the first two were  
48  
49 308 correlated with vitamin D status in our study in univariate analyses, neither remained  
50  
51 309 significant in multivariate analyses. We didn't measure serum transferrin receptor in our  
52  
53 310 study, though we did observe a correlation of vitamin D status with hemoglobin  
54  
55  
56  
57  
58  
59  
60

1  
2  
3 311 concentrations among the HIV-infected subset. Another study in South Africa found that  
4  
5 312 TB status (active disease vs. latent infection), month of sampling, and BMI were  
6  
7  
8 313 significantly correlated with vitamin D status in multivariate analyses [3]. All patients in  
9  
10 314 our study had active disease, and we didn't observe a relationship with BMI in our  
11  
12 315 analyses. The study in South Africa incorporated only those correlates associated with  
13  
14 316 serum 25(OH)D concentration with  $P < 0.05$  in univariate analysis in the multivariate  
15  
16 317 model. This may have precluded selection of important covariates and confounders, if  
17  
18 318 measured, and produced biased estimates and confidence intervals; increasing the  
19  
20 319 nominal significance level to 20% or more, as used in this study [19] can eliminate most  
21  
22 320 of this bias. Most other studies have been with smaller sample sizes and have examined a  
23  
24 321 limited set of covariates, compared to the current study.  
25  
26  
27  
28  
29  
30  
31

32 322  
33 323 There was no association of vitamin D status with mortality or HIV disease progression  
34  
35 324 in this cohort, unlike our previous studies among HIV-infected pregnant women [13 20]  
36  
37 325 or HIV-infected adults [21 22] in Tanzania. The major difference is that in our earlier  
38  
39 326 studies [13 20], a large majority (~85%) of the participants had stage 1 or asymptomatic  
40  
41 327 HIV disease, whereas in this study, most of the individuals were already at stage 3  
42  
43 328 disease.  
44  
45  
46  
47  
48

49 330 The association of vitamin D insufficiency with TB recurrence/relapse, primarily driven  
50  
51 331 by the HIV-uninfected subset, is a novel finding in a longitudinal study and has important  
52  
53 332 implications. Vitamin D deficiency has been linked to TB in several studies – a  
54  
55 333 hypothesis perhaps initially generated by the observed seasonality of TB. *In vitro* and  
56  
57  
58  
59  
60

1  
2  
3 334 animal studies indicate that 1,25-dihydroxyvitamin D<sub>3</sub>, the most active form of vitamin  
4  
5 335 D, may increase mycobacterial killing by macrophages but also limits host damage by  
6  
7  
8 336 decreasing the gamma-interferon production [23-28]. In perhaps the strongest evidence to  
9  
10 337 date for a role of vitamin D in tuberculosis, a study by Liu *et al* [29] found that the  
11  
12 338 antimycobacterial response in humans is dependent on adequate availability of vitamin D.

13  
14  
15  
16 339

17  
18  
19 340 A few randomized trials of vitamin D supplementation in TB patients have been  
20  
21 341 conducted in the past few years [4 5 30]. In a randomized trial that was conducted among  
22  
23 342 365 TB patients in Guinea-Bissau starting antituberculosis treatment, overall mortality  
24  
25 343 was 15% (54 of 365) at 1 year of follow-up and similar in both arms [5]. Martineau and  
26  
27 344 colleagues didn't find a difference in median time to sputum culture conversion with  
28  
29 345 vitamin D supplementation of 2.5 mg vitamin D<sub>3</sub> at enrollment, 14, 28, and 42 days after  
30  
31 346 starting TB treatment in 126 adults with sputum smear-positive PTB [4]. A recent report  
32  
33 347 by Coussens *et al* from a subset of the 126 adults included in the trial above stated that  
34  
35 348 median time to sputum smear conversion in the intervention arm was significantly shorter  
36  
37 349 than in the control arm (23 vs. 36 days; p=0.04) [30]. The lack of effect and concordance  
38  
39 350 in most of these trials is probably due to the dose and dosing interval used. It is worth  
40  
41 351 noting however, that large intermittent doses of vitamin D may result in  
42  
43 352 supraphysiological concentrations in some cases, which may be more harmful than  
44  
45 353 helpful in their effects on the immune system [31].  
46  
47  
48  
49  
50  
51  
52  
53  
54  
55  
56  
57  
58  
59  
60

1  
2  
3 355 Vitamin D insufficiency also was associated with T-cell subset counts only among the  
4  
5 356 HIV-infected patients in this cohort. We can only speculate as to the reasons for the  
6  
7  
8 357 significantly higher increase in CD4 T-cells observed in patients with vitamin D  
9  
10 358 insufficiency at baseline. One potential explanation is that HIV-infected patients with  
11  
12 359 vitamin D insufficiency may experience more uncontrolled immune reconstitution,  
13  
14 360 leading to a greater increase in CD4 T-cell counts, on treatment of TB, compared to  
15  
16 361 patients with adequate vitamin D status. This may also explain why this relationship is  
17  
18 362 observed only in the first eight months of follow-up and not subsequently.  
19  
20  
21  
22  
23 363  
24  
25  
26  
27 364 The results for CD8 and CD3 T-cells are consistent with our previous studies among  
28  
29 365 HIV-infected women in Tanzania [13 14]. This could suggest a possible role of vitamin  
30  
31 366 D in inflammation. Although, the conventional role of CD8 cells is as cytotoxic cells,  
32  
33 367 they also are effector cells in inflammation [32]. The involvement of vitamin D in  
34  
35 368 modulating CD8 cells is also indicated by the fact that CD8 cells express the highest  
36  
37 369 concentration of vitamin D receptor of the immune cells [33]. Other studies also have  
38  
39 370 found that vitamin D suppresses antigen-stimulated proinflammatory cytokine responses,  
40  
41 371 which may help speed up resolution of inflammatory responses that can lead to increased  
42  
43 372 risk of mortality among TB patients [30].  
44  
45  
46  
47  
48 373  
49  
50 374 TB, once known as 'consumption', is associated with significant wasting and weight loss.  
51  
52 375 The observation that better vitamin D status among HIV-uninfected patients is associated  
53  
54 376 with a greater increase in BMI during follow-up is likely related to decreased risk of  
55  
56  
57  
58  
59  
60

1  
2  
3 377 relapse among these patients, as well as improvement in quality of life through  
4  
5 378 mechanisms such as better metabolism that were not directly assessed in this study.  
6  
7  
8 379 The major strengths of this study include a large number of participants, more than half  
9  
10 380 of whom were HIV-infected, comprehensive assessment of clinical, immunological,  
11  
12 381 socio-demographic, and nutritional parameters, and a long duration of follow-up. On the  
13  
14 382 other hand, the major limitation is the possibility of reverse causation and residual  
15  
16 383 confounding. We have attempted to minimize this through rigorous analyses and  
17  
18 384 adjusting for several potential confounders, including hemoglobin concentrations, HIV  
19  
20 385 status, viral load, CD4 T-cells, and Karnofsky score, in most analyses. The study results  
21  
22 386 are generalizable to most settings with a high TB burden and widely prevalent vitamin D  
23  
24 387 insufficiency.  
25  
26  
27  
28  
29  
30  
31  
32  
33  
34  
35  
36  
37  
38  
39  
40  
41  
42  
43  
44  
45  
46  
47  
48  
49  
50  
51  
52  
53  
54  
55  
56  
57  
58  
59  
60

389 In summary, our study results indicate that adequate vitamin D status is associated with  
390 better clinical and nutritional parameters during follow-up in a cohort of TB patients in  
391 Tanzania. While randomized trials of vitamin D supplementation among TB patients are  
392 urgently warranted, it is also imperative to conduct dose-response studies to determine  
393 ideal dose and duration for the supplement.

394  
395  
396

1  
2  
3 397 *Acknowledgments*  
4

5 398 We thank the patients, whose participation made this study possible. We are grateful to  
6  
7  
8 399 the study coordinator, Dorothy Mallya, and to the study physicians, research nurses, and  
9  
10 400 laboratory and administrative staff at Muhimbili University of Health and Allied Sciences  
11  
12 401 in Dar es Salaam, Tanzania, for their contributions to the project.  
13

14  
15 402

16  
17 403 *Financial support*  
18

19  
20  
21 404 National Institute of Allergy and Infectious Diseases, National Institutes of Health (grant  
22  
23 405 U01AI045441 to support the study)  
24

25  
26 406

27  
28 407 The authors report NO conflict of interest  
29

30  
31 408

32  
33 409 *Author Contributions*  
34

35 410 SM wrote the first draft of the manuscript and analyzed and interpreted the data; FMM,  
36  
37 411 RJB, SA, WU, EV, and WWF were investigators of the parent trial and contributed to  
38  
39 412 field activities and oversight; RJB also helped with the analysis and interpretation of the  
40  
41 413 data; all authors participated in study design and contributed to the final manuscript. All  
42  
43 414 authors have also read and approved the final manuscript.  
44  
45

46  
47 415

48  
49 416  
50  
51  
52  
53  
54  
55  
56  
57  
58  
59  
60



## References

1. WHO. Global Tuberculosis Control. Geneva: World Health Organization, 2011.
2. Chaisson RE, Martinson NA. Tuberculosis in Africa--combating an HIV-driven crisis. *N Engl J Med* 2008;**358**(11):1089-92 doi: 358/11/1089 [pii] 10.1056/NEJMp0800809[published Online First: Epub Date]].
3. Martineau AR, Nhamoyebonde S, Oni T, et al. Reciprocal seasonal variation in vitamin D status and tuberculosis notifications in Cape Town, South Africa. *Proc Natl Acad Sci U S A* 2011;**108**(47):19013-7 doi: 10.1073/pnas.1111825108[published Online First: Epub Date]].
4. Martineau AR, Timms PM, Bothamley GH, et al. High-dose vitamin D(3) during intensive-phase antimicrobial treatment of pulmonary tuberculosis: a double-blind randomised controlled trial. *Lancet* 2011;**377**(9761):242-50 doi: 10.1016/S0140-6736(10)61889-2[published Online First: Epub Date]].
5. Wejse C, Gomes VF, Rabna P, et al. Vitamin D as supplementary treatment for tuberculosis: a double-blind, randomized, placebo-controlled trial. *American Journal of Respiratory and Critical Care Medicine* 2009;**179**(9):843-50 doi: 10.1164/rccm.200804-567OC[published Online First: Epub Date]].
6. Villamor E, Mugusi F, Urassa W, et al. A Trial of the Effect of Micronutrient Supplementation on Treatment Outcome, T Cell Counts, Morbidity, and Mortality in Adults with Pulmonary Tuberculosis. *J Infect Dis* 2008;**197**(11):1499-505 doi: 10.1086/587846 10.1086/587846 [pii][published Online First: Epub Date]].

- 1  
2  
3 7. Karnofsky DA, Abelmann WH, Craver LF, et al. The use of nitrogen mustards in the  
4  
5 palliative treatment of cancer. *Cancer* 1948;**1**:634-56  
6  
7
- 8 8. Fawzi WW, Msamanga GI, Spiegelman D, et al. A randomized trial of multivitamin  
9  
10 supplements and HIV disease progression and mortality. *N Engl J Med* 2004;**351**(1):23-  
11  
12 32  
13
- 14 9. Baum M, Cassetti L, Bonvehi P, et al. Inadequate dietary intake and altered nutrition  
15  
16 status in early HIV-1 infection. *Nutrition* 1994;**10**(1):16-20  
17  
18
- 19 10. Lohman TG, Roche AF, Martorell R. *Anthropometric standardization reference*  
20  
21 *manual*. Champaign, IL: Human Kinetics Books, 1988.  
22  
23
- 24 11. WHO. Interim proposal for a WHO staging system for HIV infection and disease.  
25  
26 *Wkly Epidemiol Rec* 1990;**65**:221-24  
27  
28
- 29 12. Friis H, Range N, Pedersen ML, et al. Hypovitaminosis D is common among  
30  
31 pulmonary tuberculosis patients in Tanzania but is not explained by the acute phase  
32  
33 response. *J Nutr* 2008;**138**(12):2474-80 doi: 138/12/2474 [pii]  
34  
35 10.3945/jn.108.094979[published Online First: Epub Date]].  
36  
37
- 38 13. Mehta S, Giovannucci E, Mugusi FM, et al. Vitamin D status of HIV-infected women  
39  
40 and its association with HIV disease progression, anemia, and mortality. *PLoS ONE*  
41  
42 2010;**5**(1):e8770 doi: 10.1371/journal.pone.0008770[published Online First: Epub Date]].  
43  
44
- 45 14. Mehta S, Spiegelman D, Aboud S, et al. Lipid-soluble vitamins A, D, and E in HIV-  
46  
47 infected pregnant women in Tanzania. *European journal of clinical nutrition*  
48  
49 2010;**64**(8):808-17 doi: 10.1038/ejcn.2010.76[published Online First: Epub Date]].  
50  
51
- 52 15. Davies PD, Church HA, Bovornkitti S, et al. Altered vitamin D homeostasis in  
53  
54 tuberculosis. *Intern Med (Thailand)* 1988;**4**:45-47  
55  
56  
57  
58  
59  
60

- 1  
2  
3  
4  
5  
6  
7  
8  
9  
10  
11  
12  
13  
14  
15  
16  
17  
18  
19  
20  
21  
22  
23  
24  
25  
26  
27  
28  
29  
30  
31  
32  
33  
34  
35  
36  
37  
38  
39  
40  
41  
42  
43  
44  
45  
46  
47  
48  
49  
50  
51  
52  
53  
54  
55  
56  
57  
58  
59  
60
16. Norman AW. Nutritional Aspects of Vitamin D. <http://vitamind.ucr.edu/nutri.html>. Accessed Oct 9, 2006. 1999. <http://vitamind.ucr.edu/nutri.html> (accessed Oct 9, 2006).
17. Utiger RD. The need for more vitamin D. *N Engl J Med* 1998;**338**(12):828-9
18. Holick MF. High prevalence of vitamin D inadequacy and implications for health. *Mayo Clin Proc* 2006;**81**(3):353-73
19. Greenland S. Modeling and variable selection in epidemiologic analysis. *Am J Public Health* 1989;**79**(3):340-9
20. Mehta S, Mugusi FM, Spiegelman D, et al. Vitamin D status and its association with morbidity including wasting and opportunistic illnesses in HIV-infected women in Tanzania. *AIDS Patient Care STDS* 2011;**25**(10):579-85 doi: 10.1089/apc.2011.0182[published Online First: Epub Date].
21. Sudfeld CR, Giovannucci EL, Isanaka S, et al. Vitamin D Status and Incidence of Pulmonary Tuberculosis, Opportunistic Infections, and Wasting Among HIV-Infected Tanzanian Adults Initiating Antiretroviral Therapy. *The Journal of infectious diseases* 2013;**207**(3):378-85 doi: 10.1093/infdis/jis693[published Online First: Epub Date].
22. Sudfeld CR, Wang M, Aboud S, et al. Vitamin D and HIV progression among Tanzanian adults initiating antiretroviral therapy. *PloS one* 2012;**7**(6):e40036 doi: 10.1371/journal.pone.0040036[published Online First: Epub Date].
23. Thoma-Uszynski S, Stenger S, Takeuchi O, et al. Induction of direct antimicrobial activity through mammalian toll-like receptors. *Science* 2001;**291**(5508):1544-7
24. Waters WR, Palmer MV, Nonnecke BJ, et al. Mycobacterium bovis infection of vitamin D-deficient NOS2<sup>-/-</sup> mice. *Microb Pathog* 2004;**36**(1):11-7

- 1  
2  
3 25. Waters WR, Nonnecke BJ, Foote MR, et al. Mycobacterium bovis bacille Calmette-  
4 Guerin vaccination of cattle: activation of bovine CD4+ and gamma delta TCR+ cells and  
5  
6 modulation by 1,25-dihydroxyvitamin D3. Tuberculosis (Edinb) 2003;**83**(5):287-97  
7  
8  
9  
10 26. Waters WR, Nonnecke BJ, Rahner TE, et al. Modulation of Mycobacterium bovis-  
11 specific responses of bovine peripheral blood mononuclear cells by 1,25-  
12  
13 dihydroxyvitamin D(3). Clin Diagn Lab Immunol 2001;**8**(6):1204-12  
14  
15  
16  
17 27. Kawakami K, Teruya K, Tohyama M, et al. [A therapeutic trial of experimental  
18 tuberculosis with gamma-interferon in an immunocompromised mouse model]. Kekkaku  
19  
20 1994;**69**(10):607-13  
21  
22  
23  
24 28. McMurray DN, Bartow RA, Mintzer CL, et al. Micronutrient status and immune  
25 function in tuberculosis. Ann N Y Acad Sci 1990;**587**:59-69  
26  
27  
28  
29 29. Liu PT, Stenger S, Li H, et al. Toll-Like Receptor Triggering of a Vitamin D-  
30 Mediated Human Antimicrobial Response. Science 2006:1123933 doi:  
31  
32 10.1126/science.1123933[published Online First: Epub Date]].  
33  
34  
35  
36 30. Coussens AK, Wilkinson RJ, Hanifa Y, et al. Vitamin D accelerates resolution of  
37 inflammatory responses during tuberculosis treatment. Proc Natl Acad Sci 2012:Epub  
38  
39  
40 31. Martineau AR. Bolus-dose vitamin D and prevention of childhood pneumonia. Lancet  
41 2012;**379**(9824):1373-5 doi: 10.1016/S0140-6736(12)60405-X[published Online First:  
42  
43 Epub Date]].  
44  
45  
46  
47 32. Babbe H, Roers A, Waisman A, et al. Clonal expansions of CD8(+) T cells dominate  
48 the T cell infiltrate in active multiple sclerosis lesions as shown by micromanipulation  
49 and single cell polymerase chain reaction. J Exp Med 2000;**192**(3):393-404  
50  
51  
52  
53  
54  
55  
56  
57  
58  
59  
60

1  
2  
3 33. Veldman CM, Cantorna MT, DeLuca HF. Expression of 1,25-dihydroxyvitamin D(3)  
4 receptor in the immune system. Arch Biochem Biophys 2000;374(2):334-8 doi:  
5  
6

7  
8 10.1006/abbi.1999.1605  
9

10 S0003-9861(99)91605-3 [pii][published Online First: Epub Date].  
11  
12  
13  
14  
15  
16  
17  
18  
19  
20  
21  
22  
23  
24  
25  
26  
27  
28  
29  
30  
31  
32  
33  
34  
35  
36  
37  
38  
39  
40  
41  
42  
43  
44  
45  
46  
47  
48  
49  
50  
51  
52  
53  
54  
55  
56  
57  
58  
59  
60

For peer review only

1  
2  
3  
4  
5  
6  
7  
8  
9  
10  
11  
12  
13  
14  
15  
16  
17  
18  
19  
20  
21  
22  
23  
24  
25  
26  
27  
28  
29  
30  
31  
32  
33  
34  
35  
36  
37  
38  
39  
40  
41  
42  
43  
44  
45  
46  
47  
48  
49  
50  
51  
52  
53  
54  
55  
56  
57  
58  
59  
60

*Figure Legends*

1. Distribution of 25-hydroxyvitamin D concentrations at baseline (nmol/L)
2. Distribution of 25-hydroxyvitamin D concentrations by season of blood draw;  
Season 1: Dry (January-February); Season 2: Long Rains (March-June); Season 3:  
Dry (July-October); Season 4: Short Rains (November-December)

For peer review only

1  
2  
3  
4  
5  
6  
7  
8  
9  
10  
11  
12  
13  
14  
15  
16  
17  
18  
19  
20  
21  
22  
23  
24  
25  
26  
27  
28  
29  
30  
31  
32  
33  
34  
35  
36  
37  
38  
39  
40  
41  
42  
43  
44  
45  
46  
47  
48  
49  
50  
51  
52  
53  
54  
55  
56  
57  
58  
59  
60

**Tables**

| <b>Table 1</b>                                                     | <b>Baseline Characteristics of the Study Population (n=677)</b> |                                      |                                      |
|--------------------------------------------------------------------|-----------------------------------------------------------------|--------------------------------------|--------------------------------------|
|                                                                    |                                                                 | <b>HIV-infected<br/>(n=344)</b>      | <b>HIV-uninfected<br/>(n=333)</b>    |
| <b>Variable</b>                                                    |                                                                 | <b>Mean (Standard<br/>Deviation)</b> | <b>Mean (Standard<br/>Deviation)</b> |
| Age, years                                                         |                                                                 | 34.4 ± 8.6                           | 30.2 ± 9.2                           |
| Money spent on food per person per day,<br>Tanzanian Shillings*    |                                                                 | 587.3 ± 445.9                        | 580.1 ± 684.2                        |
| Hemoglobin, g/dL                                                   |                                                                 | 9.9 ± 1.8                            | 11.1 ± 1.7                           |
| Albumin, g/dL                                                      |                                                                 | 2.8 ± 1.0                            | 3.2 ± 1.1                            |
| CD3 T-cell count, cells/μL                                         |                                                                 | 1228.0 ± 608.5                       | 1195.9 ± 404.8                       |
| CD4 T-cell counts, cells/μL                                        |                                                                 | 327.2 ± 246.2                        | 709.2 ± 250.8                        |
| CD8 T-cell counts, cells/μL                                        |                                                                 | 826.9 ± 447.5                        | 427.5 ± 188.2                        |
| Log(10) Viral Load, copies/mL                                      |                                                                 | 4.6 ± 1.0                            | N/A                                  |
| Body Mass Index, kg/m <sup>2</sup>                                 |                                                                 | 19.4 ± 2.8                           | 18.8 ± 2.5                           |
| Mid-Upper Arm Circumference, cm                                    |                                                                 | 23.4 ± 2.7                           | 23.1 ± 2.7                           |
| Follow-up time, days                                               |                                                                 | 916.8 ± 507.4                        | 1532.9 ± 331.4                       |
|                                                                    |                                                                 |                                      |                                      |
|                                                                    |                                                                 | <b>n (%)</b>                         | <b>n (%)</b>                         |
| Vitamin D insufficiency (serum 25-<br>hydroxyvitamin D <75 nmol/L) |                                                                 | 218 (63.4%)                          | 200 (60.1%)                          |

|  |                                                             |             |             |
|--|-------------------------------------------------------------|-------------|-------------|
|  |                                                             |             |             |
|  | Vitamin D deficiency (serum 25-hydroxyvitamin D <50 nmol/L) | 55 (16.0%)  | 51 (15.3%)  |
|  |                                                             |             |             |
|  | Sex                                                         |             |             |
|  | Male                                                        | 203 (59.0%) | 257 (77.2%) |
|  | Female                                                      | 141 (41.0%) | 76 (22.8%)  |
|  |                                                             |             |             |
|  | Center                                                      |             |             |
|  | Mwananyamala                                                | 79 (23.0%)  | 88 (26.4%)  |
|  | Temeke                                                      | 102 (29.7%) | 83 (24.9%)  |
|  | Tandale                                                     | 83 (24.1%)  | 91 (27.3%)  |
|  | Mbgala                                                      | 31 (9.0%)   | 70 (21.0%)  |
|  | Amana                                                       | 49 (14.2%)  | 1 (.3%)     |
|  |                                                             |             |             |
|  | Karnofsky Score <70%                                        | 45 (13.1%)  | 29 (8.7%)   |
|  |                                                             |             |             |
|  | Education Group                                             |             |             |
|  | None                                                        | 29 (8.4%)   | 36 (10.8%)  |
|  | Low <5years                                                 | 35 (10.2%)  | 31 (9.3%)   |
|  | Primary 5-8 years                                           | 238 (69.2%) | 233 (70.0%) |
|  | Secondary/University                                        | 42 (12.2%)  | 33 (9.9%)   |
|  |                                                             |             |             |



|                                       |            |             |             |
|---------------------------------------|------------|-------------|-------------|
| Cohabits with a Partner               |            | 200 (58.1%) | 168 (50.5%) |
| Assets at home                        |            |             |             |
|                                       | None       | 92 (26.9%)  | 108 (32.4%) |
|                                       | One        | 89 (26.0%)  | 85 (25.5%)  |
|                                       | 2-3        | 122 (35.7%) | 114 (34.2%) |
|                                       | 4-5        | 39 (11.4%)  | 26 (7.8%)   |
| WHO HIV Disease Stage                 |            |             |             |
|                                       | 3          | 240 (90.9%) | N/A         |
|                                       | 4          | 24 (9.1%)   |             |
| CD4 T-cell categories, cells/ $\mu$ L |            |             |             |
|                                       | 0-199      | 97 (35.9%)  | 0 (.0%)     |
|                                       | 200-499    | 116 (43.0%) | 69 (22.9%)  |
|                                       | 500+       | 57 (21.1%)  | 232 (77.1%) |
| WHO BMI Group, kg/m <sup>2</sup>      |            |             |             |
|                                       | <16        | 26 (7.7%)   | 33 (9.9%)   |
|                                       | 16-16.99   | 37 (10.9%)  | 45 (13.6%)  |
|                                       | 17-18.49   | 73 (21.5%)  | 88 (26.5%)  |
|                                       | 18.5-19.99 | 79 (23.3%)  | 70 (21.1%)  |
|                                       | 20-21.99   | 77 (22.7%)  | 69 (20.8%)  |

1  
2  
3  
4  
5  
6  
7  
8  
9  
10  
11  
12  
13  
14  
15  
16  
17  
18  
19  
20  
21  
22  
23  
24  
25  
26  
27  
28  
29  
30  
31  
32  
33  
34  
35  
36  
37  
38  
39  
40  
41  
42  
43  
44  
45  
46  
47  
48  
49  
50  
51  
52  
53  
54  
55  
56  
57  
58  
59  
60

|                                                                         |     |            |           |
|-------------------------------------------------------------------------|-----|------------|-----------|
|                                                                         | 22+ | 47 (13.9%) | 27 (8.1%) |
|                                                                         |     |            |           |
| * 1 US Dollar $\cong$ 1000 Tanzanian Shillings at the time of the study |     |            |           |

For peer review only

| <b>Table 2</b>                       |                | <b>Vitamin D Status and Mortality and HIV Disease Progression in HIV-infected TB Patients</b> |                |                     |                |
|--------------------------------------|----------------|-----------------------------------------------------------------------------------------------|----------------|---------------------|----------------|
|                                      |                | <b>Univariate</b>                                                                             |                | <b>Multivariate</b> |                |
| <b>Outcome</b>                       | <b>n/N (%)</b> | <b>RR (95% CI)</b>                                                                            | <b>p-value</b> | <b>RR (95% CI)</b>  | <b>p-value</b> |
| <b>Mortality</b>                     |                |                                                                                               |                |                     |                |
| Vitamin D insufficiency (<75 nmol/L) | 61/218 (28.0%) | 0.73 (0.50, 1.08)                                                                             | 0.12           | 0.70 (0.47, 1.04)   | 0.08           |
| Adequate Vitamin D                   | 43/126 (34.1%) |                                                                                               |                |                     |                |
| Vitamin D deficient (<50 nmol/L)     | 20/55 (36.4%)  | 1.34 (0.82, 2.18)                                                                             | 0.25           | 0.91 (0.55 1.50)    | 0.71           |
| Not deficient                        | 84/289 (29.1%) |                                                                                               |                |                     |                |
| Continuous Vitamin D (nmol/L)        |                | 1.00 (0.99, 1.01)                                                                             | 0.49           | 1.01 (1.00, 1.02)   | 0.15           |
| <b>HIV Disease Progression</b>       |                |                                                                                               |                |                     |                |

|                                                                                                                                                        |                   |                   |             |                      |      |
|--------------------------------------------------------------------------------------------------------------------------------------------------------|-------------------|-------------------|-------------|----------------------|------|
| Vitamin D<br>insufficiency<br>( $<75$ nmol/L)                                                                                                          | 46/150<br>(30.7%) | 1.10 (0.67, 1.82) | 0.71        | 1.08 (0.64, 1.82)    | 0.78 |
| Adequate<br>Vitamin D                                                                                                                                  | 23/90<br>(25.6%)  | Reference         |             | Reference            |      |
| Vitamin D<br>deficient ( $<50$<br>nmol/L)                                                                                                              | 14/34<br>(41.2%)  | 1.91 (1.05, 3.44) | <b>0.03</b> | 1.48 (0.78, 2.82)    | 0.23 |
| Not deficient                                                                                                                                          | 55/206<br>(26.7%) | Reference         |             | Reference            |      |
| Continuous Vitamin D<br>(nmol/L)                                                                                                                       |                   | 0.99 (0.98, 1.01) | 0.30        | 1.00 (0.99,<br>1.01) | 0.57 |
| p-values obtained using Cox Proportional Hazards Regression; RR: Risk Ratio; 95%<br>CI: 95% Confidence Interval                                        |                   |                   |             |                      |      |
| Multivariate analyses adjusted for Age, Karnofsky Score, Baseline Hemoglobin, Viral Load,<br>HIV Status, CD4 Counts, and Micronutrient Supplementation |                   |                   |             |                      |      |

| <b>Table 3</b>                                                                                      |                   | <b>Vitamin D Status and Treatment Outcomes in TB Patients</b> |                    |                |                     |                |
|-----------------------------------------------------------------------------------------------------|-------------------|---------------------------------------------------------------|--------------------|----------------|---------------------|----------------|
|                                                                                                     |                   |                                                               | <b>Univariate</b>  |                | <b>Multivariate</b> |                |
| <i>Outcome</i>                                                                                      | <i>n/N (%)</i>    |                                                               | <i>RR (95% CI)</i> | <i>p-value</i> | <i>RR (95% CI)</i>  | <i>p-value</i> |
| <b>Treatment Failure by 1 month post-treatment initiation</b>                                       |                   |                                                               |                    |                |                     |                |
| Vitamin D<br>insufficiency<br>( $<75$ nmol/L)                                                       | 58/298<br>(19.5%) |                                                               | 1.06 (0.72, 1.55)  | 0.77           | 1.02 (0.70, 1.49)   | 0.93           |
| Adequate<br>Vitamin D                                                                               | 34/185<br>(18.4%) |                                                               |                    |                |                     |                |
| Vitamin D<br>deficient ( $<50$<br>nmol/L)                                                           | 15/75<br>(20.0%)  |                                                               | 1.06 (0.65, 1.74)  | 0.82           | 1.13 (0.69, 1.86)   | 0.63           |
| Not deficient                                                                                       | 77/408<br>(18.9%) |                                                               |                    |                |                     |                |
| Continuous Vitamin D<br>(nmol/L)                                                                    |                   |                                                               | 1.00 (0.99, 1.01)  | 0.49           | 1.00 (0.99, 1.01)   | 0.50           |
| <b>Any Relapse (relapse after 1 month post-treatment initiation if culture negative at 1 month)</b> |                   |                                                               |                    |                |                     |                |
| Vitamin D<br>insufficiency                                                                          | 51/227<br>(22.5%) |                                                               | 1.56 (0.98, 2.48)  | 0.06           | 1.66 (1.04, 2.64)   | <b>0.03</b>    |

|                                                                                                                                                     |                                        |                   |                   |      |                   |             |  |
|-----------------------------------------------------------------------------------------------------------------------------------------------------|----------------------------------------|-------------------|-------------------|------|-------------------|-------------|--|
|                                                                                                                                                     | (<75 nmol/L)                           |                   |                   |      |                   |             |  |
|                                                                                                                                                     | Adequate<br>Vitamin D                  | 21/146<br>(14.4%) |                   |      |                   |             |  |
|                                                                                                                                                     |                                        |                   |                   |      |                   |             |  |
|                                                                                                                                                     | Vitamin D<br>deficient (<50<br>nmol/L) | 13/56<br>(23.2%)  | 1.25 (0.73, 2.12) | 0.41 | 1.40 (0.82, 2.39) | 0.21        |  |
|                                                                                                                                                     | Not deficient                          | 59/317<br>(18.6%) |                   |      |                   |             |  |
|                                                                                                                                                     |                                        |                   |                   |      |                   |             |  |
|                                                                                                                                                     | Continuous Vitamin D<br>(nmol/L)       |                   | 0.99 (0.98, 1.00) | 0.06 | 0.99 (0.98, 1.00) | <b>0.04</b> |  |
|                                                                                                                                                     |                                        |                   |                   |      |                   |             |  |
| p-values obtained using Binomial Regression; RR: Risk Ratio; 95% CI: 95% Confidence Interval                                                        |                                        |                   |                   |      |                   |             |  |
| Multivariate analyses adjusted for Age, Karnofsky Score, Baseline Hemoglobin, Viral Load, HIV Status, CD4 Counts, and Micronutrient Supplementation |                                        |                   |                   |      |                   |             |  |

1  
2  
3  
4  
5  
6  
7  
8  
9  
10  
11  
12  
13  
14  
15  
16  
17  
18  
19  
20  
21  
22  
23  
24  
25  
26  
27  
28  
29  
30  
31  
32  
33  
34  
35  
36  
37  
38  
39  
40  
41  
42  
43  
44  
45  
46  
47  
48  
49

| Table 4 | Vitamin D Status and T-cell Counts (cells/ $\mu$ L) in TB Patients |                                                                |                                                                         |         |  |                                                       |                                                                |                                                                         |         |  |                                            |                                                                |                                                                         |         |
|---------|--------------------------------------------------------------------|----------------------------------------------------------------|-------------------------------------------------------------------------|---------|--|-------------------------------------------------------|----------------------------------------------------------------|-------------------------------------------------------------------------|---------|--|--------------------------------------------|----------------------------------------------------------------|-------------------------------------------------------------------------|---------|
|         | CD4 T-cells                                                        |                                                                |                                                                         |         |  | CD8 T-cells                                           |                                                                |                                                                         |         |  | CD3 T-cells                                |                                                                |                                                                         |         |
| Outcome | Adequate vitamin D, mean difference (SD) <sup>a</sup>              | Vitamin D insufficiency, mean difference (95% CI) <sup>b</sup> | Vitamin D insufficiency, adjusted mean difference (95% CI) <sup>c</sup> | p-value |  | Adequate vitamin D, mean difference (SD) <sup>a</sup> | Vitamin D insufficiency, mean difference (95% CI) <sup>b</sup> | Vitamin D insufficiency, adjusted mean difference (95% CI) <sup>c</sup> | p-value |  | Adequate vitamin D, mean (SD) <sup>a</sup> | Vitamin D insufficiency, mean difference (95% CI) <sup>b</sup> | Vitamin D insufficiency, adjusted mean difference (95% CI) <sup>c</sup> | p-value |
|         |                                                                    |                                                                |                                                                         |         |  |                                                       |                                                                |                                                                         |         |  |                                            |                                                                |                                                                         |         |

1  
2  
3  
4  
5  
6  
7  
8  
9  
10  
11  
12  
13  
14  
15  
16  
17  
18  
19  
20  
21  
22  
23  
24  
25  
26  
27  
28  
29  
30  
31  
32  
33  
34  
35  
36  
37  
38  
39  
40  
41  
42  
43  
44  
45  
46  
47  
48  
49

|                                                  |              |              |              |          |              |               |               |                         |               |                |                |                        |  |
|--------------------------------------------------|--------------|--------------|--------------|----------|--------------|---------------|---------------|-------------------------|---------------|----------------|----------------|------------------------|--|
| <b>Entire follow-up: HIV-infected patients</b>   |              |              |              |          |              |               |               |                         |               |                |                |                        |  |
| Vitamin D insufficiency (<75 nmol/L)             | 300<br>(234) | 17 (-23, 56) | 21 (-18, 59) | 0.2<br>9 | 902<br>(457) | 88 (7, 169)   | 85 (4, 165)   | <b>0.0</b><br><b>4</b>  | 1298<br>(635) | 101 (-4, 206)  | 103 (-5, 212)  | 0.0<br>6               |  |
| Vitamin D deficient (<50 nmol/L)                 | 333<br>(225) | 21 (-34, 76) | 30 (-26, 86) | 0.2<br>9 | 957<br>(424) | 105 (-9, 219) | 114 (-6, 234) | 0.0<br>6                | 1392<br>(595) | 104 (-47, 255) | 125 (-28, 279) | 0.1<br>1               |  |
| Continuous Vitamin D (per nmol/L)                |              | 0 (-1, 1)    | -1 (-1, 0)   | 0.2<br>6 |              | -3 (-5, -1)   | -3 (-5, -1)   | <b>0.0</b><br><b>04</b> |               | -3 (-5, -1)    | -3 (-6, -1)    | <b>0.0</b><br><b>1</b> |  |
| <b>Entire follow-up: HIV-uninfected patients</b> |              |              |              |          |              |               |               |                         |               |                |                |                        |  |
| Vitamin D                                        | 771          | -2 (-)       | 3 (-45, 3)   | 0.9      | 508          | -25 (-)       | -22 (-)       | 0.2                     | 1351          | -37 (-)        | -28 (-)        | 0.4                    |  |



|                                                           |                                      |            |               |                |              |            |               |               |              |            |                |                |              |
|-----------------------------------------------------------|--------------------------------------|------------|---------------|----------------|--------------|------------|---------------|---------------|--------------|------------|----------------|----------------|--------------|
|                                                           | insufficiency (<75 nmol/L)           | (235 )     | 49, 45)       | 51)            | 1            | (209 )     | 63, 14)       | 60, 17)       | 7            | (400)      | 109, 35)       | 99, 44)        | 5            |
|                                                           | Vitamin D deficient (<50 nmol/L)     | 781 (241 ) | -34 (-99, 30) | -34 (-101, 32) | 0.3 1        | 500 (195 ) | -1 (-64, 62)  | 3 (-61, 67)   | 0.9 3        | 1354 (397) | -33 (-136, 71) | -28 (-134, 79) | 0.6 1        |
|                                                           | Continuous Vitamin D (per nmol/L)    |            | 0 (-1, 1)     | 0 (-1, 1)      | 0.9 7        |            | 0 (-1, 1)     | 0 (-1, 1)     | 0.8 3        |            | 0 (-1, 2)      | 0 (-2, 2)      | 0.9 0        |
| <b>First 8 months of follow-up: HIV-infected patients</b> |                                      |            |               |                |              |            |               |               |              |            |                |                |              |
|                                                           | Vitamin D insufficiency (<75 nmol/L) | 316 (237 ) | 54 (8, 100)   | 58 (13, 104)   | <b>0.0 1</b> | 868 (470 ) | 132 (29, 235) | 119 (15, 223) | <b>0.0 2</b> | 1279 (670) | 190 (42, 337)  | 179 (28, 331)  | <b>0.0 2</b> |

1  
2  
3  
4  
5  
6  
7  
8  
9  
10  
11  
12  
13  
14  
15  
16  
17  
18  
19  
20  
21  
22  
23  
24  
25  
26  
27  
28  
29  
30  
31  
32  
33  
34  
35  
36  
37  
38  
39  
40  
41  
42  
43  
44  
45  
46  
47  
48  
49

1  
2  
3  
4  
5  
6  
7  
8  
9  
10  
11  
12  
13  
14  
15  
16  
17  
18  
19  
20  
21  
22  
23  
24  
25  
26  
27  
28  
29  
30  
31  
32  
33  
34  
35  
36  
37  
38  
39  
40  
41  
42  
43  
44  
45  
46  
47  
48  
49

|                                                             |                                      |              |              |               |                        |              |               |               |                         |               |                |                |                         |
|-------------------------------------------------------------|--------------------------------------|--------------|--------------|---------------|------------------------|--------------|---------------|---------------|-------------------------|---------------|----------------|----------------|-------------------------|
|                                                             |                                      |              |              |               |                        |              |               |               |                         |               |                |                |                         |
|                                                             | Vitamin D deficient (<50 nmol/L)     | 372<br>(264) | 36 (-25, 97) | 41 (-20, 101) | 0.1<br>9               | 963<br>(471) | 63 (-77, 203) | 75 (-72, 221) | 0.3<br>2                | 1443<br>(689) | 67 (-125, 259) | 101 (-93, 295) | 0.3<br>1                |
|                                                             | Continuous Vitamin D (per nmol/L)    |              | -1 (-2, 0)   | -1 (-2, 0)    | <b>0.0</b><br><b>1</b> |              | -4 (-6, -1)   | -4 (-6, -1)   | <b>0.0</b><br><b>02</b> |               | -4 (-7, -1)    | -5 (-8, -2)    | <b>0.0</b><br><b>03</b> |
| <b>First 8 months of follow-up: HIV-uninfected patients</b> |                                      |              |              |               |                        |              |               |               |                         |               |                |                |                         |
|                                                             | Vitamin D insufficiency (<75 nmol/L) | 724<br>(243) | 1 (-52, 53)  | 6 (-47, 59)   | 0.8<br>2               | 461<br>(232) | -22 (-63, 20) | -17 (-57, 22) | 0.3<br>9                | 1248<br>(446) | -38 (-121, 46) | -27 (-106, 52) | 0.5<br>0                |
|                                                             | Vitamin D deficient                  | 731          | -7 (-)       | -7 (-)        | 0.8                    | 454          | 4 (-73,)      | 5 (-71,)      | 0.9                     | 1247          | 14 (-)         | 17 (-)         | 0.8                     |

|  |                                   |        |          |          |          |        |           |           |          |       |           |           |          |
|--|-----------------------------------|--------|----------|----------|----------|--------|-----------|-----------|----------|-------|-----------|-----------|----------|
|  | (<50 nmol/L)                      | (237 ) | 95, 80)  | 96, 81)  | 7        | (209 ) | 81)       | 81)       | 0        | (410) | 124, 153) | 123, 156) | 2        |
|  | Continuous Vitamin D (per nmol/L) |        | 0 (-2,1) | 0 (-2,1) | 0.5<br>4 |        | 0 (-1, 1) | 0 (-1, 1) | 0.7<br>3 |       | 0 (-2, 1) | 0 (-2, 1) | 0.5<br>7 |

<sup>a</sup> Data are the means (SD) of the average measurement during follow-up for each participant

<sup>b</sup> Data are the mean difference between the low and the adequate vitamin D group, as defined in Column B. The mean differences, 95% confidence intervals (CIs), and corresponding p-values were estimated from generalized estimating equations, after adjustment for baseline measurements, follow-up time, and treatment (micronutrients vs. placebo) group.

<sup>c</sup> Multivariate analyses additionally adjusted for Age, Karnofsky Score, and Baseline Hemoglobin

1  
2  
3  
4  
5  
6  
7  
8  
9  
10  
11  
12  
13  
14  
15  
16  
17  
18  
19  
20  
21  
22  
23  
24  
25  
26  
27  
28  
29  
30  
31  
32  
33  
34  
35  
36  
37  
38  
39  
40  
41  
42  
43  
44  
45  
46  
47  
48  
49

| Table 5 Vitamin D Status and Nutritional Parameters in TB Patients |                                            |                                                                |                                                                         |         |                                            |                                                                |                                                                         |         |                                            |                                                                |                                                                         |         |
|--------------------------------------------------------------------|--------------------------------------------|----------------------------------------------------------------|-------------------------------------------------------------------------|---------|--------------------------------------------|----------------------------------------------------------------|-------------------------------------------------------------------------|---------|--------------------------------------------|----------------------------------------------------------------|-------------------------------------------------------------------------|---------|
|                                                                    | Body Mass Index (kg/m <sup>2</sup> )       |                                                                |                                                                         |         | Albumin concentration (g/dL)               |                                                                |                                                                         |         | Hemoglobin concentration (g/dL)            |                                                                |                                                                         |         |
| Outcome                                                            | Adequate vitamin D, mean (SD) <sup>a</sup> | Vitamin D insufficiency, mean difference (95% CI) <sup>b</sup> | Vitamin D insufficiency, adjusted mean difference (95% CI) <sup>c</sup> | p-value | Adequate vitamin D, mean (SD) <sup>a</sup> | Vitamin D insufficiency, mean difference (95% CI) <sup>b</sup> | Vitamin D insufficiency, adjusted mean difference (95% CI) <sup>c</sup> | p-value | Adequate vitamin D, mean (SD) <sup>a</sup> | Vitamin D insufficiency, mean difference (95% CI) <sup>b</sup> | Vitamin D insufficiency, adjusted mean difference (95% CI) <sup>c</sup> | p-value |
| Entire                                                             |                                            |                                                                |                                                                         |         |                                            |                                                                |                                                                         |         |                                            |                                                                |                                                                         |         |

1  
2  
3  
4  
5  
6  
7  
8  
9  
10  
11  
12  
13  
14  
15  
16  
17  
18  
19  
20  
21  
22  
23  
24  
25  
26  
27  
28  
29  
30  
31  
32  
33  
34  
35  
36  
37  
38  
39  
40  
41  
42  
43  
44  
45  
46  
47  
48  
49

|                                      |                 |                        |                        |      |                |                        |                       |          |                 |                        |                        |          |  |
|--------------------------------------|-----------------|------------------------|------------------------|------|----------------|------------------------|-----------------------|----------|-----------------|------------------------|------------------------|----------|--|
| <b>follow-up:</b>                    |                 |                        |                        |      |                |                        |                       |          |                 |                        |                        |          |  |
| <b>All patients</b>                  |                 |                        |                        |      |                |                        |                       |          |                 |                        |                        |          |  |
| Vitamin D insufficiency (<75 nmol/L) | 21.20<br>(2.80) | -0.06<br>(-0.30, 0.17) | -0.08<br>(-0.30, 0.14) | 0.46 | 3.42<br>(0.74) | -0.05<br>(-0.14, 0.04) | 0.00<br>(-0.08, 0.08) | 0.9<br>7 | 12.65<br>(1.80) | -0.16<br>(-0.40, 0.08) | -0.18<br>(-0.41, 0.05) | 0.<br>12 |  |
| Vitamin D deficient (<50 nmol/L)     | 21.23<br>(3.00) | -0.16<br>(-0.46, 0.14) | -0.14<br>(-0.44, 0.15) | 0.34 | 3.42<br>(0.72) | -0.05<br>(-0.17, 0.07) | 0.02<br>(-0.08, 0.13) | 0.65     | 12.42<br>(1.87) | 0.15<br>(-0.16, 0.45)  | 0.17<br>(-0.11, 0.45)  | 0.2<br>4 |  |

1  
2  
3  
4  
5  
6  
7  
8  
9  
10  
11  
12  
13  
14  
15  
16  
17  
18  
19  
20  
21  
22  
23  
24  
25  
26  
27  
28  
29  
30  
31  
32  
33  
34  
35  
36  
37  
38  
39  
40  
41  
42  
43  
44  
45  
46  
47  
48  
49

|                             |                                                  |                      |                         |                         |             |  |                        |                          |                       |      |                       |                        |                        |          |
|-----------------------------|--------------------------------------------------|----------------------|-------------------------|-------------------------|-------------|--|------------------------|--------------------------|-----------------------|------|-----------------------|------------------------|------------------------|----------|
|                             | Continuous Vitamin D (per nmol/L)                | 0.00<br>(0.00, 0.01) | 0.00<br>(0.00, 0.01)    | 0.30                    |             |  | 0.002<br>(0.00, 0.004) | 0.000<br>(-0.002, 0.002) | 0.90                  |      | 0.00<br>(-0.01, 0.01) | 0.00<br>(0.00, 0.01)   | 0.8<br>5               |          |
| <b>For peer review only</b> |                                                  |                      |                         |                         |             |  |                        |                          |                       |      |                       |                        |                        |          |
|                             | <b>First 8 months of follow-up: All patients</b> |                      |                         |                         |             |  |                        |                          |                       |      |                       |                        |                        |          |
|                             | Vitamin D insufficiency (<75 nmol/L)             | 20.96<br>(2.73)      | -0.20<br>(-0.40, -0.01) | -0.21<br>(-0.39, -0.02) | <b>0.03</b> |  | 3.42<br>(1.09)         | -0.01<br>(-0.18, 0.16)   | 0.04<br>(-0.13, 0.21) | 0.65 | 12.12<br>(1.85)       | -0.01<br>(-0.28, 0.26) | -0.04<br>(-0.31, 0.23) | 0.7<br>8 |

|                                   |                 |                       |                       |      |                |                          |                          |      |  |                 |                       |                       |          |
|-----------------------------------|-----------------|-----------------------|-----------------------|------|----------------|--------------------------|--------------------------|------|--|-----------------|-----------------------|-----------------------|----------|
|                                   |                 |                       |                       |      |                |                          |                          |      |  |                 |                       |                       |          |
| Vitamin D deficient (<50 nmol/L)  | 20.85<br>(2.84) | 0.00<br>(-0.25, 0.25) | 0.04<br>(-0.21, 0.29) | 0.78 | 3.41<br>(1.08) | -0.11<br>(-0.32, 0.10)   | -0.05<br>(-0.27, 0.17)   | 0.64 |  | 11.92<br>(1.99) | 0.16<br>(-0.18, 0.50) | 0.21<br>(-0.10, 0.53) | 0.1<br>9 |
| Continuous Vitamin D (per nmol/L) |                 | 0.00<br>(0.00, 0.01)  | 0.00<br>(0.00, 0.01)  | 0.38 |                | 0.000<br>(-0.003, 0.005) | 0.000<br>(-0.004, 0.004) | 0.87 |  |                 | 0.00<br>(-0.01, 0.00) | 0.00<br>(-0.01, 0.00) | 0.5<br>7 |

<sup>a</sup>Data are the means (SD) of the average measurement during follow-up for each participant

<sup>b</sup>Data are the mean difference between the low and the adequate vitamin D group, as defined in Column B. The mean differences, 95% confidence intervals (CIs), and corresponding p-values were estimated from generalized estimating equations, after adjustment for baseline

1  
2  
3  
4  
5 measurements, follow-up time, and treatment (micronutrients vs. placebo) group.  
6

7 <sup>c</sup> Multivariate analyses additionally adjusted for Age, Karnofsky Score, Baseline Hemoglobin, Viral Load, CD4 Count, and HIV Status;  
8  
9 HIV status removed from the model where the results are stratified by HIV status. Viral Load also removed from the model in HIV-  
10  
11 uninfected individuals.  
12  
13  
14  
15  
16  
17  
18  
19  
20  
21  
22  
23  
24  
25  
26  
27  
28  
29  
30  
31  
32  
33  
34  
35  
36  
37  
38  
39  
40  
41  
42  
43  
44  
45  
46  
47  
48  
49



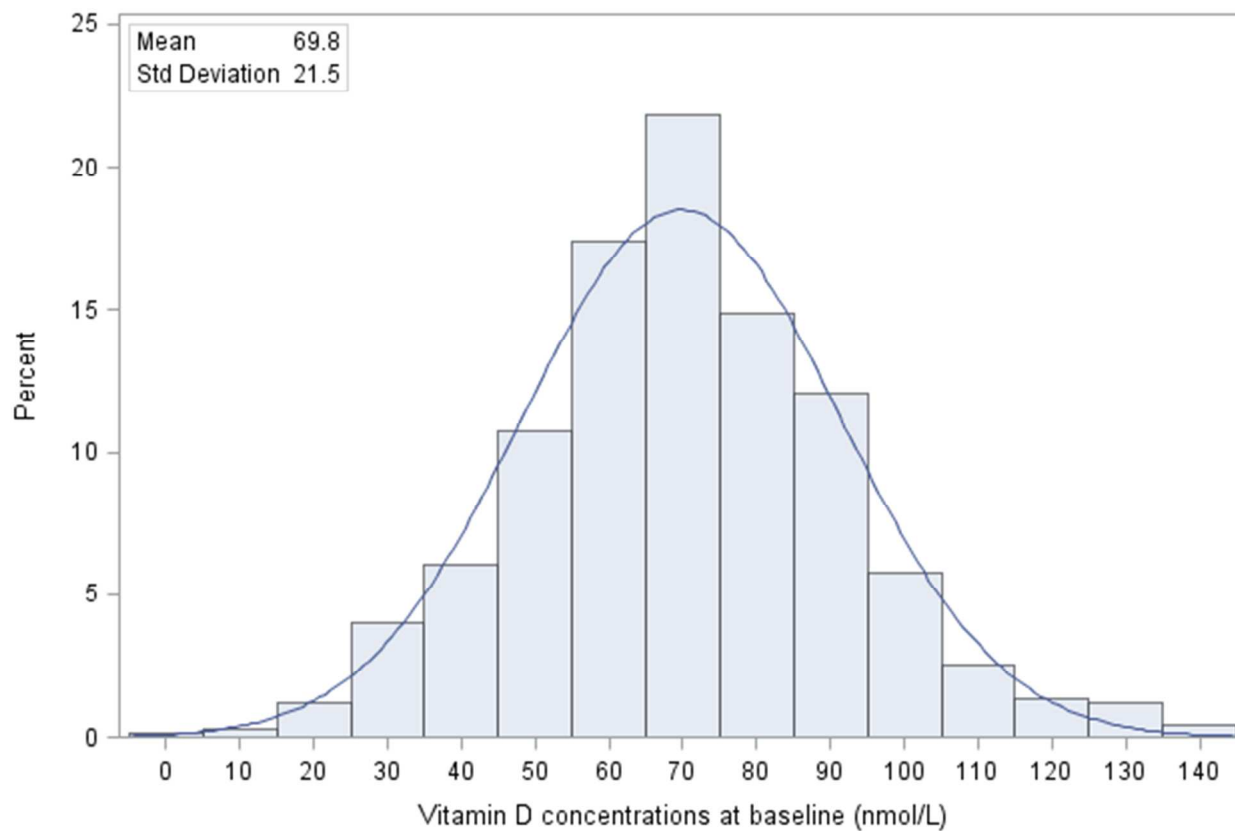

Review only

1  
2  
3  
4  
5  
6  
7  
8  
9  
10  
11  
12  
13  
14  
15  
16  
17  
18  
19  
20  
21  
22  
23  
24  
25  
26  
27  
28  
29  
30  
31  
32  
33  
34  
35  
36  
37  
38  
39  
40  
41  
42  
43  
44  
45  
46  
47  
48  
49  
50  
51  
52  
53  
54  
55  
56  
57  
58  
59  
60

1  
2  
3  
4  
5  
6  
7  
8  
9  
10  
11  
12  
13  
14  
15  
16  
17  
18  
19  
20  
21  
22  
23  
24  
25  
26  
27  
28  
29  
30  
31  
32  
33  
34  
35  
36  
37  
38  
39  
40  
41  
42  
43  
44  
45  
46  
47  
48  
49  
50  
51  
52  
53  
54  
55  
56  
57  
58  
59  
60

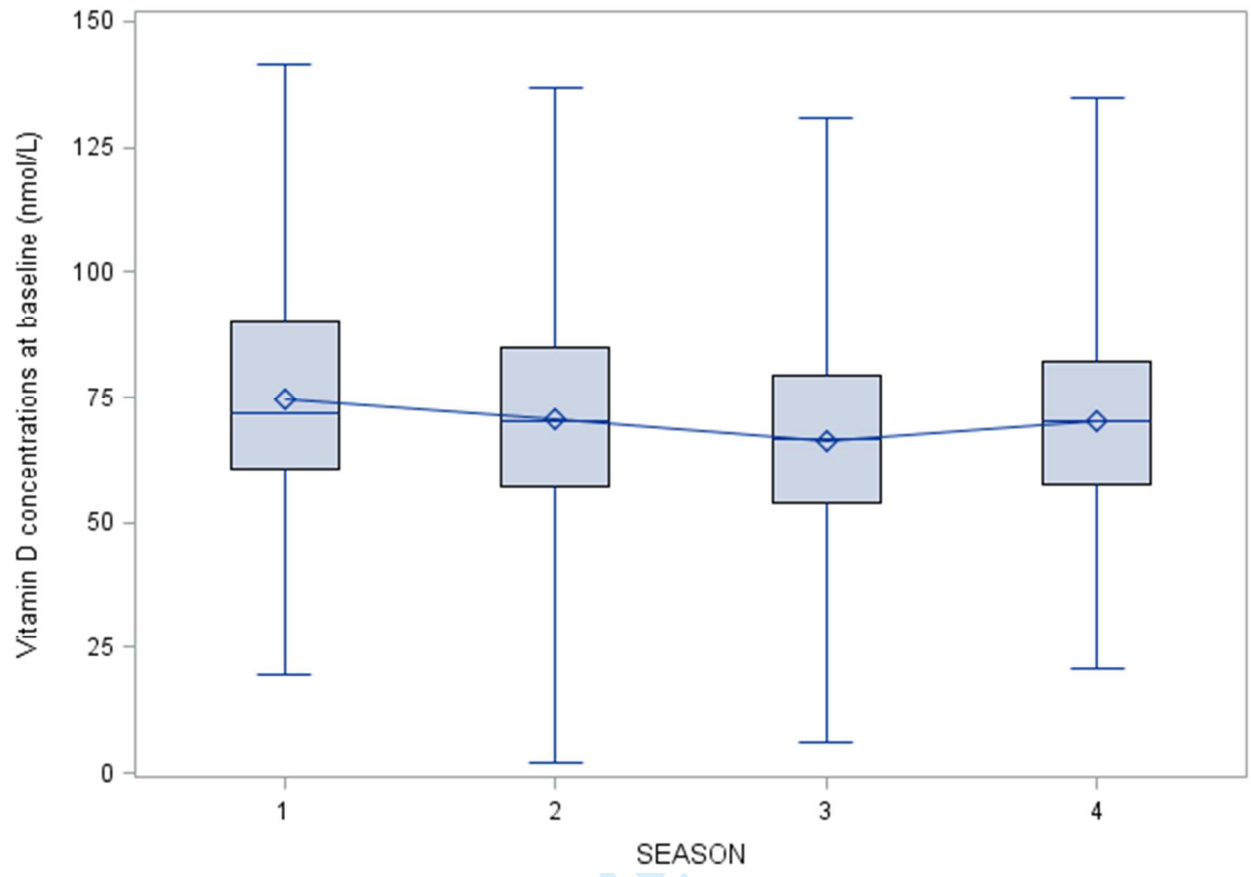

Review only

| Supplemental Table 1                                                  |                          | Correlates of Vitamin D insufficiency (25(OH)D < 75 nmol/L) in HIV-uninfected TB patients |              |                       |              |
|-----------------------------------------------------------------------|--------------------------|-------------------------------------------------------------------------------------------|--------------|-----------------------|--------------|
|                                                                       |                          | Univariate (p<0.20)                                                                       |              | Multivariate (p<0.05) |              |
| Variable                                                              |                          | RR (95% CI)                                                                               | p-value      | RR (95% CI)           | p-value      |
| Season                                                                |                          |                                                                                           | <b>0.002</b> |                       | <b>0.002</b> |
|                                                                       | 1: Dry (Jan-Feb)         | Ref.                                                                                      |              | Ref.                  |              |
|                                                                       | 2: Long Rains (Mar-Jun)  | 1.07 (0.74, 1.53)                                                                         |              | 1.09 (0.76, 1.56)     |              |
|                                                                       | 3: Dry (Jul-Oct)         | 1.50 (1.07, 2.09)                                                                         |              | 1.50 (1.08, 2.08)     |              |
|                                                                       | 4: Short Rains (Nov-Dec) | 1.29 (0.84, 1.96)                                                                         |              | 1.26 (0.84, 1.90)     |              |
| Sex                                                                   |                          |                                                                                           |              |                       |              |
|                                                                       | Female                   | 1.19 (0.99, 1.43)                                                                         | 0.07         |                       |              |
| Cohabits with a partner                                               |                          | 0.89 (0.75, 1.06)                                                                         | 0.19         |                       |              |
| Money spent per person per day on food, per 1000 Tanzanian Shillings* |                          | 0.76 (0.59, 0.98)                                                                         | <b>0.04</b>  | 0.76 (0.59, 0.98)     | <b>0.03</b>  |
| Money spent per person per day on food quartiles                      |                          |                                                                                           | 0.14         |                       |              |
|                                                                       | 0:<250                   | 1.36 (1.03, 1.80)                                                                         |              |                       |              |
|                                                                       | 1:250-499                | 1.11 (0.82, 1.52)                                                                         |              |                       |              |
|                                                                       | 2:500-750                | 1.13 (0.84, 1.53)                                                                         |              |                       |              |
|                                                                       | 3:>750                   | Ref.                                                                                      |              |                       |              |
| AFB Culture positive at baseline                                      |                          | 1.17 (0.94, 1.46)                                                                         | 0.16         |                       |              |
| Number of colonies in AFB culture                                     |                          |                                                                                           | 0.16         |                       |              |
|                                                                       | 1                        | Ref.                                                                                      |              |                       |              |
|                                                                       | 2                        | 1.01 (0.66, 1.56)                                                                         |              |                       |              |
|                                                                       | 3                        | 0.95 (0.63, 1.44)                                                                         |              |                       |              |
|                                                                       | 4                        | 1.05 (0.70, 1.58)                                                                         |              |                       |              |

|  |                                           |                   |              |                   |             |
|--|-------------------------------------------|-------------------|--------------|-------------------|-------------|
|  | 5                                         | 1.27 (1.01, 1.59) |              |                   |             |
|  |                                           |                   |              |                   |             |
|  | Received TB treatment in the past 5 years | 1.41 (0.97, 2.04) | 0.07         |                   |             |
|  |                                           |                   |              |                   |             |
|  | Hemoglobin, g/dL                          | 0.92 (0.87, 0.97) | <b>0.004</b> |                   |             |
|  |                                           |                   |              |                   |             |
|  | CD4 T-cells, 100 cells/ $\mu$ L           | 1.03 (0.99, 1.07) | 0.12         |                   |             |
|  |                                           |                   |              |                   |             |
|  | CD3 T-cells, 100 cells/ $\mu$ L           | 1.02 (1.00, 1.04) | 0.12         |                   |             |
|  |                                           |                   |              |                   |             |
|  | Depressed >2 weeks, ever                  | 1.17 (0.97, 1.42) | 0.10         |                   |             |
|  |                                           |                   |              |                   |             |
|  | Dysentery                                 | 0.23 (0.04, 1.41) | 0.11         |                   |             |
|  |                                           |                   |              |                   |             |
|  | Outpatient visit                          | 1.14 (0.95, 1.38) | 0.16         |                   |             |
|  |                                           |                   |              |                   |             |
|  | Skin rash                                 | 0.73 (0.46, 1.16) | 0.18         |                   |             |
|  |                                           |                   |              |                   |             |
|  | Height quartiles, cm                      |                   | <b>0.01</b>  |                   | <b>0.01</b> |
|  | <158.1                                    | Ref.              |              | Ref.              |             |
|  | 158.1-164.0                               | 1.08 (0.87, 1.32) |              | 1.12 (0.93, 1.36) |             |
|  | 164.1-169.5                               | 0.76 (0.59, 0.98) |              | 0.82 (0.64, 1.04) |             |
|  | 169.6+                                    | 0.77 (0.60, 0.99) |              | 0.81 (0.64, 1.03) |             |
|  |                                           |                   |              |                   |             |
|  | Weight, kg                                | 0.99 (0.97, 1.00) | <b>0.03</b>  |                   |             |
|  |                                           |                   |              |                   |             |
|  | WHO BMI groups, kg/m <sup>2</sup>         |                   | 0.14         |                   |             |
|  | <16                                       | 1.14 (0.88, 1.48) |              |                   |             |
|  | 16-16.99                                  | 0.98 (0.74, 1.29) |              |                   |             |
|  | 17-18.49                                  | Ref.              |              |                   |             |
|  | 18.5-19.99                                | 0.76 (0.57, 1.02) |              |                   |             |
|  | 20-21.99                                  | 0.89 (0.68, 1.15) |              |                   |             |
|  | 22+                                       | 1.11 (0.83, 1.48) |              |                   |             |
|  |                                           |                   |              |                   |             |
|  | Mid-Upper Arm Circumference (MUAC) <22 cm | 1.27 (1.07, 1.51) | <b>0.01</b>  |                   |             |
|  |                                           |                   |              |                   |             |
|  | Triceps Skinfold Thickness,               | 1.02 (1.00, 1.03) | 0.09         |                   |             |

|                                                                                                                                                                       |  |  |  |  |  |  |  |
|-----------------------------------------------------------------------------------------------------------------------------------------------------------------------|--|--|--|--|--|--|--|
| cm                                                                                                                                                                    |  |  |  |  |  |  |  |
|                                                                                                                                                                       |  |  |  |  |  |  |  |
| p-values obtained using Binomial Regression; RR: Risk Ratio; 95% CI: 95% Confidence Interval; * 1 US Dollar $\cong$ 1000 Tanzanian Shillings at the time of the study |  |  |  |  |  |  |  |

For peer review only

| Supplemental Table 2                      |              | Correlates of Vitamin D insufficiency (serum 25(OH)D <75 nmol/L) in HIV-infected TB patients |             |                       |              |
|-------------------------------------------|--------------|----------------------------------------------------------------------------------------------|-------------|-----------------------|--------------|
|                                           |              | Univariate (p<0.20)                                                                          |             | Multivariate (p<0.05) |              |
| Variable                                  |              | RR (95% CI)                                                                                  | P-value     | RR (95% CI)           | P-value      |
| Age                                       |              | 0.99 (0.98, 1.00)                                                                            | <b>0.01</b> |                       |              |
| Center                                    |              |                                                                                              | <b>0.03</b> |                       |              |
|                                           | Mwananyamala | 1.05 (0.86, 1.27)                                                                            |             |                       |              |
|                                           | Temeke       | Ref.                                                                                         |             |                       |              |
|                                           | Tandale      | 0.80 (0.63, 1.02)                                                                            |             |                       |              |
|                                           | Mbgala       | 0.67 (0.44, 1.01)                                                                            |             |                       |              |
|                                           | Amana        | 1.03 (0.82, 1.29)                                                                            |             |                       |              |
| Cohabits with a partner                   |              | 0.90 (0.77, 1.05)                                                                            | 0.19        |                       |              |
| Assets at home                            |              |                                                                                              | 0.07        |                       |              |
|                                           | 0:none       | 1.36 (1.03, 1.80)                                                                            |             |                       |              |
|                                           | 1:one        | 0.88 (0.66, 1.16)                                                                            |             |                       |              |
|                                           | 2:2-3        | 0.87 (0.67, 1.14)                                                                            |             |                       |              |
|                                           | 3:4-5        | Ref.                                                                                         |             |                       |              |
| Received TB treatment in the past 5 years |              | 0.58 (0.31, 1.10)                                                                            | 0.10        |                       |              |
| Hemoglobin, g/dL                          |              | 0.95 (0.90, 1.00)                                                                            | <b>0.04</b> | 0.93 (0.89, 0.98)     | <b>0.007</b> |
| Albumin, U/L                              |              | 0.93 (0.86, 1.02)                                                                            | 0.13        |                       |              |
| CD4 T-cells, 100 cells/ $\mu$ L           |              | 1.02 (0.99, 1.05)                                                                            | 0.12        | 1.04 (1.01, 1.07)     | <b>0.02</b>  |
| Depressed >2 weeks, ever                  |              | 0.80 (0.61, 1.05)                                                                            | 0.11        |                       |              |
| Hospitalization                           |              | 1.30 (0.94, 1.80)                                                                            | 0.11        |                       |              |
| Skin rash                                 |              | 1.32 (1.07, 1.64)                                                                            | <b>0.01</b> |                       |              |
| Extrapulmonary TB                         |              | 1.35 (0.93, 1.96)                                                                            | 0.11        |                       |              |

## Online Supporting Material

|                                                                                              |            |                   |             |  |  |
|----------------------------------------------------------------------------------------------|------------|-------------------|-------------|--|--|
| Height, cm                                                                                   |            | 0.99 (0.98, 1.00) | 0.08        |  |  |
| Weight, kg                                                                                   |            | 0.99 (0.98, 1.00) | 0.11        |  |  |
| WHO Body Mass Index (BMI) groups, kg/m <sup>2</sup>                                          |            |                   | 0.06        |  |  |
|                                                                                              | <16        | 0.81 (0.57, 1.16) |             |  |  |
|                                                                                              | 16-16.99   | 0.99 (0.76, 1.27) |             |  |  |
|                                                                                              | 17-18.49   | Ref.              |             |  |  |
|                                                                                              | 18.5-19.99 | 0.80 (0.63, 1.02) |             |  |  |
|                                                                                              | 20-21.99   | 0.75 (0.58, 0.96) |             |  |  |
|                                                                                              | 22+        | 1.05 (0.84, 1.30) |             |  |  |
| Mid-Upper Arm Circumference (MUAC) quartiles, cm                                             |            |                   | <b>0.02</b> |  |  |
|                                                                                              | <=21       | Ref.              |             |  |  |
|                                                                                              | 21.1-23.0  | 1.09 (0.90, 1.32) |             |  |  |
|                                                                                              | 23.1-24.9  | 0.81 (0.61, 1.08) |             |  |  |
|                                                                                              | 25+        | 0.82 (0.66, 1.03) |             |  |  |
| p-values obtained using Binomial Regression; RR: Risk Ratio; 95% CI: 95% Confidence Interval |            |                   |             |  |  |

STROBE 2007 (v4) Statement—Checklist of items that should be included in reports of *cohort studies*

| Section/Topic                | Item # | Recommendation                                                                                                                                                                       | Reported on page # |
|------------------------------|--------|--------------------------------------------------------------------------------------------------------------------------------------------------------------------------------------|--------------------|
| Title and abstract           | 1      | (a) Indicate the study's design with a commonly used term in the title or the abstract                                                                                               | 2                  |
|                              |        | (b) Provide in the abstract an informative and balanced summary of what was done and what was found                                                                                  | 2-3                |
| <b>Introduction</b>          |        |                                                                                                                                                                                      |                    |
| Background/rationale         | 2      | Explain the scientific background and rationale for the investigation being reported                                                                                                 | 5                  |
| Objectives                   | 3      | State specific objectives, including any prespecified hypotheses                                                                                                                     | 6                  |
| <b>Methods</b>               |        |                                                                                                                                                                                      |                    |
| Study design                 | 4      | Present key elements of study design early in the paper                                                                                                                              | 6-8                |
| Setting                      | 5      | Describe the setting, locations, and relevant dates, including periods of recruitment, exposure, follow-up, and data collection                                                      | 6-8                |
| Participants                 | 6      | (a) Give the eligibility criteria, and the sources and methods of selection of participants. Describe methods of follow-up                                                           | 6-8                |
|                              |        | (b) For matched studies, give matching criteria and number of exposed and unexposed                                                                                                  | NA                 |
| Variables                    | 7      | Clearly define all outcomes, exposures, predictors, potential confounders, and effect modifiers. Give diagnostic criteria, if applicable                                             | 6, 9               |
| Data sources/<br>measurement | 8*     | For each variable of interest, give sources of data and details of methods of assessment (measurement). Describe comparability of assessment methods if there is more than one group | 9-10               |
| Bias                         | 9      | Describe any efforts to address potential sources of bias                                                                                                                            | 10                 |
| Study size                   | 10     | Explain how the study size was arrived at                                                                                                                                            | 10                 |
| Quantitative variables       | 11     | Explain how quantitative variables were handled in the analyses. If applicable, describe which groupings were chosen and why                                                         | 10                 |
| Statistical methods          | 12     | (a) Describe all statistical methods, including those used to control for confounding                                                                                                | 9-10               |
|                              |        | (b) Describe any methods used to examine subgroups and interactions                                                                                                                  | 9-10               |
|                              |        | (c) Explain how missing data were addressed                                                                                                                                          | 9-10               |
|                              |        | (d) If applicable, explain how loss to follow-up was addressed                                                                                                                       | 9-10               |
|                              |        | (e) Describe any sensitivity analyses                                                                                                                                                | NA                 |
| <b>Results</b>               |        |                                                                                                                                                                                      |                    |



|                          |     |                                                                                                                                                                                                              |            |
|--------------------------|-----|--------------------------------------------------------------------------------------------------------------------------------------------------------------------------------------------------------------|------------|
| Participants             | 13* | (a) Report numbers of individuals at each stage of study—eg numbers potentially eligible, examined for eligibility, confirmed eligible, included in the study, completing follow-up, and analysed            | 10, Tables |
|                          |     | (b) Give reasons for non-participation at each stage                                                                                                                                                         | NA         |
|                          |     | (c) Consider use of a flow diagram                                                                                                                                                                           | NA         |
| Descriptive data         | 14* | (a) Give characteristics of study participants (eg demographic, clinical, social) and information on exposures and potential confounders                                                                     | 10-11      |
|                          |     | (b) Indicate number of participants with missing data for each variable of interest                                                                                                                          | 10         |
|                          |     | (c) Summarise follow-up time (eg, average and total amount)                                                                                                                                                  | 11         |
| Outcome data             | 15* | Report numbers of outcome events or summary measures over time                                                                                                                                               | Tables     |
| Main results             | 16  | (a) Give unadjusted estimates and, if applicable, confounder-adjusted estimates and their precision (eg, 95% confidence interval). Make clear which confounders were adjusted for and why they were included | Tables     |
|                          |     | (b) Report category boundaries when continuous variables were categorized                                                                                                                                    | Tables     |
|                          |     | (c) If relevant, consider translating estimates of relative risk into absolute risk for a meaningful time period                                                                                             | NA         |
| Other analyses           | 17  | Report other analyses done—eg analyses of subgroups and interactions, and sensitivity analyses                                                                                                               | 10-13      |
| <b>Discussion</b>        |     |                                                                                                                                                                                                              |            |
| Key results              | 18  | Summarise key results with reference to study objectives                                                                                                                                                     | 13         |
| <b>Limitations</b>       |     |                                                                                                                                                                                                              |            |
| Interpretation           | 20  | Give a cautious overall interpretation of results considering objectives, limitations, multiplicity of analyses, results from similar studies, and other relevant evidence                                   | 14-19      |
| Generalisability         | 21  | Discuss the generalisability (external validity) of the study results                                                                                                                                        | 18-19      |
| <b>Other information</b> |     |                                                                                                                                                                                                              |            |
| Funding                  | 22  | Give the source of funding and the role of the funders for the present study and, if applicable, for the original study on which the present article is based                                                | 20         |

\*Give information separately for cases and controls in case-control studies and, if applicable, for exposed and unexposed groups in cohort and cross-sectional studies.

**Note:** An Explanation and Elaboration article discusses each checklist item and gives methodological background and published examples of transparent reporting. The STROBE checklist is best used in conjunction with this article (freely available on the Web sites of PLoS Medicine at <http://www.plosmedicine.org/>, Annals of Internal Medicine at <http://www.annals.org/>, and Epidemiology at <http://www.epidem.com/>). Information on the STROBE Initiative is available at [www.strobe-statement.org](http://www.strobe-statement.org).

1  
2  
3  
4  
5  
6  
7  
8  
9  
10  
11  
12  
13  
14  
15  
16  
17  
18  
19  
20  
21  
22  
23  
24  
25  
26  
27  
28  
29  
30  
31  
32  
33  
34  
35  
36  
37  
38  
39  
40  
41  
42  
43  
44  
45  
46  
47  
48  
49  
50  
51  
52  
53  
54  
55  
56  
57  
58  
59  
60

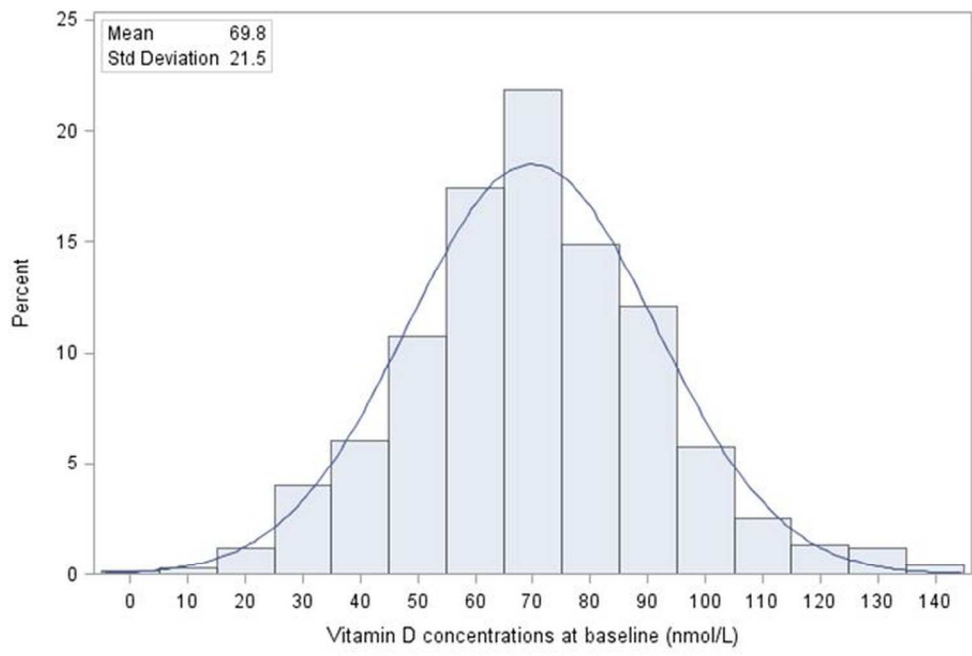

131x90mm (300 x 300 DPI)

view only

1  
2  
3  
4  
5  
6  
7  
8  
9  
10  
11  
12  
13  
14  
15  
16  
17  
18  
19  
20  
21  
22  
23  
24  
25  
26  
27  
28  
29  
30  
31  
32  
33  
34  
35  
36  
37  
38  
39  
40  
41  
42  
43  
44  
45  
46  
47  
48  
49  
50  
51  
52  
53  
54  
55  
56  
57  
58  
59  
60

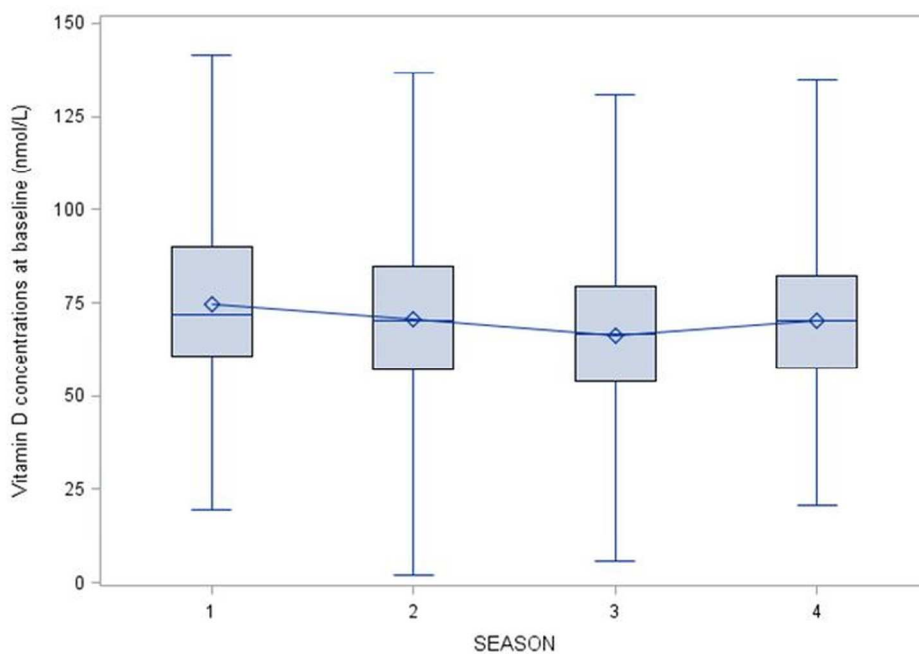

130x90mm (300 x 300 DPI)

view only

| Supplemental Table 1                                                  |                          | Correlates of Vitamin D insufficiency (25(OH)D < 75 nmol/L) in HIV-uninfected TB patients |              |                       |              |
|-----------------------------------------------------------------------|--------------------------|-------------------------------------------------------------------------------------------|--------------|-----------------------|--------------|
|                                                                       |                          | Univariate (p<0.20)                                                                       |              | Multivariate (p<0.05) |              |
| Variable                                                              |                          | RR (95% CI)                                                                               | p-value      | RR (95% CI)           | p-value      |
| Season                                                                |                          |                                                                                           | <b>0.002</b> |                       | <b>0.002</b> |
|                                                                       | 1: Dry (Jan-Feb)         | Ref.                                                                                      |              | Ref.                  |              |
|                                                                       | 2: Long Rains (Mar-Jun)  | 1.07 (0.74, 1.53)                                                                         |              | 1.09 (0.76, 1.56)     |              |
|                                                                       | 3: Dry (Jul-Oct)         | 1.50 (1.07, 2.09)                                                                         |              | 1.50 (1.08, 2.08)     |              |
|                                                                       | 4: Short Rains (Nov-Dec) | 1.29 (0.84, 1.96)                                                                         |              | 1.26 (0.84, 1.90)     |              |
| Sex                                                                   |                          |                                                                                           |              |                       |              |
|                                                                       | Female                   | 1.19 (0.99, 1.43)                                                                         | 0.07         |                       |              |
| Cohabits with a partner                                               |                          | 0.89 (0.75, 1.06)                                                                         | 0.19         |                       |              |
| Money spent per person per day on food, per 1000 Tanzanian Shillings* |                          | 0.76 (0.59, 0.98)                                                                         | <b>0.04</b>  | 0.76 (0.59, 0.98)     | <b>0.03</b>  |
| Money spent per person per day on food quartiles                      |                          |                                                                                           | 0.14         |                       |              |
|                                                                       | 0:<250                   | 1.36 (1.03, 1.80)                                                                         |              |                       |              |
|                                                                       | 1:250-499                | 1.11 (0.82, 1.52)                                                                         |              |                       |              |
|                                                                       | 2:500-750                | 1.13 (0.84, 1.53)                                                                         |              |                       |              |
|                                                                       | 3:>750                   | Ref.                                                                                      |              |                       |              |
| AFB Culture positive at baseline                                      |                          | 1.17 (0.94, 1.46)                                                                         | 0.16         |                       |              |
| Number of colonies in AFB culture                                     |                          |                                                                                           | 0.16         |                       |              |
|                                                                       | 1                        | Ref.                                                                                      |              |                       |              |
|                                                                       | 2                        | 1.01 (0.66, 1.56)                                                                         |              |                       |              |
|                                                                       | 3                        | 0.95 (0.63, 1.44)                                                                         |              |                       |              |
|                                                                       | 4                        | 1.05 (0.70, 1.58)                                                                         |              |                       |              |

|  |                                           |                   |              |                   |             |
|--|-------------------------------------------|-------------------|--------------|-------------------|-------------|
|  | 5                                         | 1.27 (1.01, 1.59) |              |                   |             |
|  |                                           |                   |              |                   |             |
|  | Received TB treatment in the past 5 years | 1.41 (0.97, 2.04) | 0.07         |                   |             |
|  |                                           |                   |              |                   |             |
|  | Hemoglobin, g/dL                          | 0.92 (0.87, 0.97) | <b>0.004</b> |                   |             |
|  |                                           |                   |              |                   |             |
|  | CD4 T-cells, 100 cells/ $\mu$ L           | 1.03 (0.99, 1.07) | 0.12         |                   |             |
|  |                                           |                   |              |                   |             |
|  | CD3 T-cells, 100 cells/ $\mu$ L           | 1.02 (1.00, 1.04) | 0.12         |                   |             |
|  |                                           |                   |              |                   |             |
|  | Depressed >2 weeks, ever                  | 1.17 (0.97, 1.42) | 0.10         |                   |             |
|  |                                           |                   |              |                   |             |
|  | Dysentery                                 | 0.23 (0.04, 1.41) | 0.11         |                   |             |
|  |                                           |                   |              |                   |             |
|  | Outpatient visit                          | 1.14 (0.95, 1.38) | 0.16         |                   |             |
|  |                                           |                   |              |                   |             |
|  | Skin rash                                 | 0.73 (0.46, 1.16) | 0.18         |                   |             |
|  |                                           |                   |              |                   |             |
|  | Height quartiles, cm                      |                   | <b>0.01</b>  |                   | <b>0.01</b> |
|  | <158.1                                    | Ref.              |              | Ref.              |             |
|  | 158.1-164.0                               | 1.08 (0.87, 1.32) |              | 1.12 (0.93, 1.36) |             |
|  | 164.1-169.5                               | 0.76 (0.59, 0.98) |              | 0.82 (0.64, 1.04) |             |
|  | 169.6+                                    | 0.77 (0.60, 0.99) |              | 0.81 (0.64, 1.03) |             |
|  |                                           |                   |              |                   |             |
|  | Weight, kg                                | 0.99 (0.97, 1.00) | <b>0.03</b>  |                   |             |
|  |                                           |                   |              |                   |             |
|  | WHO BMI groups, kg/m <sup>2</sup>         |                   | 0.14         |                   |             |
|  | <16                                       | 1.14 (0.88, 1.48) |              |                   |             |
|  | 16-16.99                                  | 0.98 (0.74, 1.29) |              |                   |             |
|  | 17-18.49                                  | Ref.              |              |                   |             |
|  | 18.5-19.99                                | 0.76 (0.57, 1.02) |              |                   |             |
|  | 20-21.99                                  | 0.89 (0.68, 1.15) |              |                   |             |
|  | 22+                                       | 1.11 (0.83, 1.48) |              |                   |             |
|  |                                           |                   |              |                   |             |
|  | Mid-Upper Arm Circumference (MUAC) <22 cm | 1.27 (1.07, 1.51) | <b>0.01</b>  |                   |             |
|  |                                           |                   |              |                   |             |
|  | Triceps Skinfold Thickness,               | 1.02 (1.00, 1.03) | 0.09         |                   |             |

1  
2  
3  
4  
5  
6  
7  
8  
9  
10  
11  
12  
13  
14  
15  
16  
17  
18  
19  
20  
21  
22  
23  
24  
25  
26  
27  
28  
29  
30  
31  
32  
33  
34  
35  
36  
37  
38  
39  
40  
41  
42  
43  
44  
45  
46  
47  
48  
49  
50  
51  
52  
53  
54  
55  
56  
57  
58  
59  
60

|                                                                                                                                                                       |  |  |  |  |  |  |
|-----------------------------------------------------------------------------------------------------------------------------------------------------------------------|--|--|--|--|--|--|
| cm                                                                                                                                                                    |  |  |  |  |  |  |
|                                                                                                                                                                       |  |  |  |  |  |  |
| p-values obtained using Binomial Regression; RR: Risk Ratio; 95% CI: 95% Confidence Interval; * 1 US Dollar $\cong$ 1000 Tanzanian Shillings at the time of the study |  |  |  |  |  |  |

For peer review only

| Supplemental Table 2                      |              | Correlates of Vitamin D insufficiency (serum 25(OH)D <75 nmol/L) in HIV-infected TB patients |             |                       |              |
|-------------------------------------------|--------------|----------------------------------------------------------------------------------------------|-------------|-----------------------|--------------|
|                                           |              | Univariate (p<0.20)                                                                          |             | Multivariate (p<0.05) |              |
| Variable                                  |              | RR (95% CI)                                                                                  | P-value     | RR (95% CI)           | P-value      |
| Age                                       |              | 0.99 (0.98, 1.00)                                                                            | <b>0.01</b> |                       |              |
| Center                                    |              |                                                                                              | <b>0.03</b> |                       |              |
|                                           | Mwananyamala | 1.05 (0.86, 1.27)                                                                            |             |                       |              |
|                                           | Temeke       | Ref.                                                                                         |             |                       |              |
|                                           | Tandale      | 0.80 (0.63, 1.02)                                                                            |             |                       |              |
|                                           | Mbgala       | 0.67 (0.44, 1.01)                                                                            |             |                       |              |
|                                           | Amana        | 1.03 (0.82, 1.29)                                                                            |             |                       |              |
| Cohabits with a partner                   |              | 0.90 (0.77, 1.05)                                                                            | 0.19        |                       |              |
| Assets at home                            |              |                                                                                              | 0.07        |                       |              |
|                                           | 0:none       | 1.36 (1.03, 1.80)                                                                            |             |                       |              |
|                                           | 1:one        | 0.88 (0.66, 1.16)                                                                            |             |                       |              |
|                                           | 2:2-3        | 0.87 (0.67, 1.14)                                                                            |             |                       |              |
|                                           | 3:4-5        | Ref.                                                                                         |             |                       |              |
| Received TB treatment in the past 5 years |              | 0.58 (0.31, 1.10)                                                                            | 0.10        |                       |              |
| Hemoglobin, g/dL                          |              | 0.95 (0.90, 1.00)                                                                            | <b>0.04</b> | 0.93 (0.89, 0.98)     | <b>0.007</b> |
| Albumin, U/L                              |              | 0.93 (0.86, 1.02)                                                                            | 0.13        |                       |              |
| CD4 T-cells, 100 cells/ $\mu$ L           |              | 1.02 (0.99, 1.05)                                                                            | 0.12        | 1.04 (1.01, 1.07)     | <b>0.02</b>  |
| Depressed >2 weeks, ever                  |              | 0.80 (0.61, 1.05)                                                                            | 0.11        |                       |              |
| Hospitalization                           |              | 1.30 (0.94, 1.80)                                                                            | 0.11        |                       |              |
| Skin rash                                 |              | 1.32 (1.07, 1.64)                                                                            | <b>0.01</b> |                       |              |
| Extrapulmonary TB                         |              | 1.35 (0.93, 1.96)                                                                            | 0.11        |                       |              |

|                                                                                              |            |                   |             |  |  |  |
|----------------------------------------------------------------------------------------------|------------|-------------------|-------------|--|--|--|
| Height, cm                                                                                   |            | 0.99 (0.98, 1.00) | 0.08        |  |  |  |
| Weight, kg                                                                                   |            | 0.99 (0.98, 1.00) | 0.11        |  |  |  |
| WHO Body Mass Index (BMI) groups, kg/m <sup>2</sup>                                          |            |                   | 0.06        |  |  |  |
|                                                                                              | <16        | 0.81 (0.57, 1.16) |             |  |  |  |
|                                                                                              | 16-16.99   | 0.99 (0.76, 1.27) |             |  |  |  |
|                                                                                              | 17-18.49   | Ref.              |             |  |  |  |
|                                                                                              | 18.5-19.99 | 0.80 (0.63, 1.02) |             |  |  |  |
|                                                                                              | 20-21.99   | 0.75 (0.58, 0.96) |             |  |  |  |
|                                                                                              | 22+        | 1.05 (0.84, 1.30) |             |  |  |  |
| Mid-Upper Arm Circumference (MUAC) quartiles, cm                                             |            |                   | <b>0.02</b> |  |  |  |
|                                                                                              | <=21       | Ref.              |             |  |  |  |
|                                                                                              | 21.1-23.0  | 1.09 (0.90, 1.32) |             |  |  |  |
|                                                                                              | 23.1-24.9  | 0.81 (0.61, 1.08) |             |  |  |  |
|                                                                                              | 25+        | 0.82 (0.66, 1.03) |             |  |  |  |
| p-values obtained using Binomial Regression; RR: Risk Ratio; 95% CI: 95% Confidence Interval |            |                   |             |  |  |  |
